# Supplementary material for: QSAR and Chemical Read-Across Analysis of 370 Potential MGMT Inactivators to Identify the Structural Features Influencing Inactivation Potency
Source: Pharmaceutics. 2023 Aug 21;15(8):2170. doi: 10.3390/pharmaceutics15082170 (PMC10458236; doi:10.3390/pharmaceutics15082170)
Supplement: Supplementary file 1 [file pharmaceutics-15-02170-s001.zip › Supplementary Materials-Tables S1-S10.xlsx]

## Sheet: Table S1-Whole dataset
Table S1. The number, chemical structure, name and inactivation activity of 436 potential MGMT inactivators (458 entries)
No.	Trinity College Identifier	Chemical Structure	Inactivator Name	MW	MGMT inactivation IC50 (μM)	The yellow/blue color means the same free compound with different status
1	allylG		O6-allylguanine	191	22	The green color means compounds without experimental values
2	benzylG		O6-benzylguanine	241	0.04
3	B4203		O6-furfurylguanine.1/2H2O	240	0.115
4	B4205		O6-thenylguanine.1/3H2O	252	0.024
5	B4206		O6-thienylmethylguanine.1MeOH	279	0.024
6	B4209		O6-furylmethylguanine	231	0.115
7	B4210		O6-(2-picolyl)guanine.1/2H2O	251	35
8	B4211		O6-(3-picolyl)guanine.1/2H2O	251	0.43
9	B4212		O6-piperonylguanine.3/4H2O	299	0.02
10	B4213		O6-(2-naphthylmethyl)guanine	291	0.15
11	B4214		DL-O6-(a-methylbenzyl)guanine	255	/
12	B4217		DL-O6-(a-methylthenyl)guanine	261	/
13	B4218		O6-(2-methylbenzyl)guanine	255	58
14	B4219		DL-O6-[1-(3-thienyl)ethyl]guanine	261	85
15	B4220		O6-(5-methylthenyl)guanine	261	9
16	B4221		O6-(5-methylfuryl)guanine.1/2H2O	254	10
17	B4222		O6-(3-methylthenyl)guanine	260	0.65
18	B4226		O6-(2-benzo[b]thienylmethyl)guanine.1MeOH	329	0.03
19	B4227		S6-furfuryl-6-thioguanine.1H2O	265	/
20	B4228		S6-piperonyl-6-thioguanine	301	50
21	B4229		O6-(5-methoxycarbonylfurfuryl)guanine.3/2H2O	316	0.09
22	B4230		S6-(cyanomethyl-6-thioguanine	206	/
23	B4231		O6-(2-methoxybenzyl)guanine.1/2H2O	280	60
24	B4232		O6-benzyl-8-oxaguanine	243	0.25
25	B4233		S6-acetonyl-6-thioguanine	223	/
26	B4234		O6-(5-carboxyfurfuryl)guanine	275	60
27	B4235		S6-phenacyl-6-thioguanine	285	/
28	B4236		S6-methyl-6-thioguanine	181	/
29	B4256		O4-benzyl-1-methyluracil	216	/
30	B4257		O4-benzyl-1-methyl-3-deazauracil	215	/
31	B4258		O4-benzyl-3-formyl-1-methyl-3-deazauracil	243	/
32	B4259		O4-piperonyl-1-methyluracil	260	/
33	B4260		O6-benzyl-8-azaguanine	242	0.075
34	B4261		O4-benzyl-6,7-dimethylpterin	281	0.23
35	B4262		O4-benzyl-1-methylthymine	230	/
36	B4263		O4-allyl-1-methylthymine	180	/
37	B4264		O4-benzylpterin	253	0.07
38	B4265		O6-1-(napthylmethyl)guanine.1/2MeOH	307	95
39	B4266		O6-(2-benzofuranylmethyl)guanine.1MeOH	313	0.035
40	B4267		O4-(4-fluorobenzyl)benzyl)-6,7-dimethylpterin	299	0.4
41	B4268		O6-piperonylguanosine.2H2O	453	0.75
42	B4269		O6-(5-bromothenyl)guanine	326	0.0045
43	B4270		O6-(4-fluorobenzyl)-8-azaguanine	260	0.08
44	B4271		O6-(3-azapiperonyl)guanine.2H2O	298	0.23
45	B4272		O6-(4-fluorobenzyl)-8-oxaguanine	261	0.02
46	B4273		O6-(5-cyanofurfuryl)guanine.1H2O	274	0.006
47	B4274		O6-(5-oxazolylmethyl)guanine.1/4H2O	237	0.35
48	B4275		O6-(5-thiazolylmethyl)guanine.1/2H2O	257	0.033
49	B4276		O6-(2-benzo[b]thienylmethyl)guanosine.1H2O	447	0.35
50	B4277		O6-(4-picolyl)guanine	242	0.13
51	B4278		O6-(1-methyl-4-nitropyrrol-2-ylmethyl)guanine.1/2H2O	298	0.55
52	B4279		O6-thenylguanosine.1/2H2O	388	0.9
53	B4280		O6-(4-bromothenyl)guanine	326	0.0034
54	B4281		O6-(5-chlorothenyl)guanine	282	0.004
55	B4282		O6-(1-oxido-3-picolyl)guanine.1H2O	276	1.4
56	B4283		O6-(5-cyanothenyl)guanine	272	0.005
57	B4284		O6-(2-fluorobenzyl)guanine	259	6
58	B4285		O6-(4-chlorobenzyl)-8-oxaguanine	277	0.225
59	B4286		O6-(4-fluorobenzyl)-8-thiaguanine	277	0.03
60	B4287		O6-(4-bromothenyl)-8-oxaguanine	328	0.24
61	B4288		O6-(4-bromothenyl)pterin	338	0.025
62	B4289		O6-(4-bromothenyl)-8-azaguanine	327	0.045
63	B4290		O6-(4-fluorobenzyl)pterin	271	0.088
64	B4291		O6-thenylhypoxanthine	232	1.9
65	B4292		O6-(4-bromothenyl)hypoxanthine	311	0.3
66	B4293		O6-furfurylhypoxanthine	216	28
67	B4294		O6-(5-methylsulphinylthenyl)guanine	309	0.03
68	B4295		O6-(5-methylthiothenyl)guanine	293	11.5
69	B4296		O6-benzyl-8-thiaguanine	259	0.02
70	B4297		O6-benzyl-2-fluorohypoxanthine	244	5.8
71	B4298		O6-(4-chlorothenyl)guanine	282	0.008
72	B4299		O6-(4-chlorothenyl)-8-oxaguanine	284	0.243
73	B4300		O6-(4-methoxythenyl)guanine	277	0.0165
74	B4301		2,4-diamino-6-(4-fluorobenzyloxy)-5-nitrosopyrimidine	263	0.0175
75	B4302		2,4-diamino-6-(4-chlorothenyloxy)pyrimidine	257	0.17
76	B4303		2,4-diamino-6-(piperonyloxy)pyrimidine	260	0.8
77	B4304		2,4-diamino-6-(4-chlorobenzyloxy)pyrimidine	251	5
78	B4305		2,4-diamino-6-(4-fluorobenzyloxy)pyrimidine	234	4
79	B4306		2,4-diamino-6-thenyloxy-5-nitropyrimidine	267	2.3
80	B4307		2,4-diamino-6-thenyloxypyrimidine	222	0.4
81	B4308		2,4-diamino-5-nitro-6-(piperonyloxy)pyrimidine	305	0.5
82	B4309		O6-(5-methylsulphonylthenyl)guanine	325	0.072
83	B4310		O6-benzyl-7-deaza-8-azaguanine	241	0.01
84	B4311		2,4-diamino-6-(4-chlorothenyloxy)-5-nitrosopyrimidine	286	0.009
85	B4312		2,4-diamino-6-(4-bromothenyloxy)-5-nitrosopyrimidine	330	0.045
86	B4313		O6-(5-bromo-3-thienylmethyl)guanine	326	0.0065
87	B4314		O6-(4-chlorothenyl)-8-azaguanine	283	0.011
88	B4315		O6-(4-chlorothenyl)-8-thiaguanine	300	0.006
89	B4316		O6-(4-chlorothenyl)pterin	294	0.025
90	B4317		O6-(4-cyanothenyl)guanine	272	0.0028
91	B4318		O6-(4,5-dichlorothenyl)guanine	316	0.015
92	B4319		O6-(6-chloro-3-picolyl)guanine	277	0.2
93	B4320		O6-(5-bromo-3-picolyl)guanine	321	0.25
94	B4321		O6-(2-chloro-4-picolyl)guanine	277	0.04
95	B4334		O6-benzyl-9-(2-hydroxyethoxymethyl)guanine	315	8
96	B4335		O6-(4-bromothenyl)-9-(2-hydroxyethoxymethyl)guanine	400	0.33
97	B4336		O6-(5-bromofurfuryl)guanine	310	0.02
98	B4337		O6-(4-bromothenyl)-8-aza-7-deazaguanine	326	0.007
99	B4338		O6-thenyl-7-deaza-8-azaguanine	247	0.01
100	B4339		O6-(4-chlorobenzyl)-7-deaza-8-azaguanine	276	0.02
101	B4340		O6-(4-fluorobenzyl)-7-deaza-8-azaguanine	259	0.018
102	B4341		O6-(4-bromothenyl)-9-(dihydrotestosteronylcarbonylmethyl)guanine	657	0.22
103	B4342		O6-(4-bromothenyl)-9-(oestra-3-ol-17-ylcarbonylmethyl)guanine	629	0.32
104	B4343		O6-piperonyl-7-deaza-8-azaguanine	285	0.0065
105	B4344		O6-benzyl-9-(methoxycarbonyl)guanine	299	0.15
106	B4345		O6-(4-bromothenyl)-9-(ethoxycarbonylmethyl)guanine	412	0.23
107	B4346		O6-(4-bromothenyl)-9-(methoxycarbonyl)guanine	384	0.0048
108	B4347		O6-benzyl-2-methylhypoxanthine	240	75
109	B4348		O6-furfuryl-8-aza-7-deazaguanine	231	0.036
110	B4349		O6-(4-bromothenyl)-8-hydroxyguanine	342	0.018
111	B4350		O6-thenyl-2-methylhypoxanthine	246	14
112	B4351		O6-(4-bromothenyl)-8-thiaguanine	344	0.0028
113	B4352		S6-(4-bromothenyl)-6-thioguanine	342	8
114	B4353		O6-(4-bromothenyl)-2-fluorohypoxanthine	329	1.4
115	B4354		O6-(4-isothiazolmethyl)guanine	248	0.07
116	B4355		O6-(3-bromobenzyl)guanine	320	0.022
117	B4356		O6-(4-methylthiothenyl)guanine	293	0.0095
118	B4357		O6-(5-iodo-3-thienylmethyl)guanine	447	0.009
119	B4358		O6-(4-bromothenyl)-9-(dihydrotestosteronylcarbonyl)guanine	643	0.025
120	B4359		O6-(4-bromothenyl)-9-(carboxymethyl)guanine,sodium salt	406	0.5
120-1			O6-(4-bromothenyl)-9-(carboxymethyl)guanine	384	0.5
121	B4360		O6-(4-bromothenyl)-9-(5-ethoxycarbonylpentyl)guanine	468	0.24
122	B4361		O6-(4-methylsulphonylthenyl)guanine	325	0.2
123	B4362		O4-benzyl-5-deazalumazine	253	/
124	B4363		O6-(4-bromothenyl)guanosine	458	0.08
125	B4364		2-amino-4-methoxycarbonylamino-5-nitroso-6-(4-bromothenyloxy)pyrimidine	388	0.15
126	B4365		4-acetamido-2-amino-5-nitroso-6-(4-bromothenyloxy)pyrimidine	372	0.045
127	B4366		O6-(naphtho[2,1-b]thiophen-2-ylmethyl)guanine	347	0.05
128	B4367		O6-(4-bromothenyl)-9-(methoxycarbonylmethyl)guanine	398	0.25
129	B4368		O6-(4-bromothenyl)-9-(b-D-arabinofuranosyl)-guanine	458	0.115
130	B4369		O6-(4-bromothenyl)-9-(ethoxymethyl)guanine	384	0.28
131	B4370		O6-(4-bromothenyl)-9-(octyloxymethyl)guanine	468	1.2
132	B4371		O6-(4-bromothenyl)-9-(3-hydroxypropyl)guanine	384	0.15
133	B4372		O6-thenyl-3-methylxanthine	262	/
134	B4373		O6-(4-azidothenyl)guanine	288	0.0063
135	B4374		O6-benzyl-3-methylxanthine	256	/
136	B4375		O6(4-bromothenyl)-3-methylxanthine	340	/
137	B4376		O4-thenyl-5-deazalumazine	250	1600
138	B4377		O6-(4-methylsulphinylthenyl)guanine	309	0.15
139	B4378		O6-(5-phenylthenyl)guanine	323	0.75
140	B4379		O6-(4-bromothenyl)-2-deoxyguanosine	442	0.095
141			O6-(4-bromobenzyl)guanine	320	0.15
142	B4380		O2-(4-bromothenyl)-5-nitrocytosine	331	50
143	B4381		O4-piperonyl-5-deazalumazine	297	/
144	B4382		2-amino-4-(4-bromothenyloxy)-5-nitropyrimidine	331	0.32
145	B4383		O6-(naphtho[1,2-b]thiophen-2-ylmethyl)guanine	347	0.22
146	B4384		2,4-diamino-6-(4-bromothenyloxy)pyrimidine	301	0.27
147	B4385		2,4-diamino-6-(naphtho[1,2-b]thiophen-2-ylmethoxy)pyrimidine	322	6.5
148	B4386		2,4-diamino-6-(benzo[b]thien-2-ylmethoxy)pyrimidine	272	0.15
149	B4387		O6-(2-methylthioethyl)guanine	225	/
150	B4388		O6-(2-hydroxyethyl)guanine	195	/
151	B4389		O6-(1-methylimidazol-5-ylmethyl)guanine	245	8.5
152	B4390		DL-O6-[a-trifluoromethyl)thenyl]guanine.1/2H2O	324	/
153	B4391		O4-(4-bromothenyl)-5-deazalumazine	338	/
154	B4392		2,4-diamino-6-(5-methylthenyloxy)pyrimidine	236	2.7
155	B4393		O6-(3-phenylbenzyl)guanine	317	0.019
156	B4394		O6-(6-methoxynaphth-2-ylmethyl)guanine	321	0.011
157	B4395		O6-(10-methylphenothiazin-3-ylmethyl)guanine	376	0.09
158	B4396		O6-(4-bromothenyl)-N,7-diacetylguanine	410	62
159	B4397		N2-acetyl-O6-(4-bromothenyl)guanine	368	2.6
160	B4398		O6-(4-methylthiobenzyl)guanine	287	0.024
161	B4399		O6-(4-methylsulphonylbenzyl)guanine	319	0.018
162	B4400		O6-benzyl-9-(b-D-arabinofuranosyl)-guanine	373	/
163	B4401		O6-(4-phenylthenyl)guanine	323	0.015
164	B4402		O6-(2-iodobenzyl)guanine	367	9.5
165	B4403		O6-(3-iodobenzyl)guanine	367	0.05
166	B4404		O6-(4-methylsulphinylbenzyl)guanine	303	0.03
167	B4405		O6-(phenanthr-3-ylmethyl)guanine	341	0.55
168	B4406		O6-(phenanthr-2-ylmethyl)guanine	341	0.72
169	B4407		O6-(phenanthro[9,10-b]thiophen-2-ylmethyl)guanine	397	1.1
170	B4408		O6-(3-methoxybenzyl)guanine	271	1.1
171	B4409		O6-(4,5,6,7-tetrahydrobenzo[b]thien-2-ylmethyl)guanine	301	185
172	B4410		O6-benzyl-3-deazaguanine	240	/
173	B4411		O6-(4-methoxybenzyl)guanine	271	0.15
174	B4412		O6-veratrylguanine	301	0.23
175	B4413		O6-(benzo[b]thien-3-ylmethyl)guanine	297	2.3
176	B4414		O6-(4-bromothenyl)-2-deoxyguanosine O3,O5-diacetate	526	0.15
177	B4415		O6-(3-methylthiobenzyl)guanine	287	0.12
178	B4416		O6-(5-bromobenzo[b]thien-2-ylmethyl)guanine	376	0.16
179	B4417		O6-(5,6,7,8-tetrahydronaphth-2-ylmethyl)guanine	295	0.3
180	B4418		O6-4-bromothenyl-3-deazaguanine	325	200
181	B4419		O6-(dibenzothien-2-ylmethyl)guanine	347	0.075
182	B4420		O6-(4-bromothenyl)-9-(phthalimidopropyl)guanine	513	0.14
183	B4421		O6-(4-bromothenyl)-9-(3-acetamidopropyl)guanine	425	0.41
184	B4422		O6-(4-bromothenyl)-9-(3-tert-butoxycarbonylaminopropyl)guanine	483	0.43
185	B4423		O6-(4-chlorobenzyl)-3-methylguanine	290	/
186	B4424		O6-(4-bromothenyl)-3-methylguanine	340	/
187	B4425		O6-thenyl-3-methylguanine	263	/
188	B4426		O4-benzyl-5-deazapterin	252	/
189	B4427		O4-thenyl-5-deazapterin	258	/
190	B4428		O4-(4-bromothenyl)-5-deazapterin	337	/
191	B4429		O4-piperonyl-5-deazapterin	296	/
192	B4430		O6-(4-bromothenyl)-9-(3-azidopropyl)guanine	409	0.043
193	B4431		O6-(4-bromothenyl)-9-(3-aminopropyl)guanine hydrochloride	420	0.3
193-1			O6-(4-bromothenyl)-9-(3-aminopropyl)guanine	420	0.3
194	B4432		O6-(4-bromothenyl)-9-(2-acetamidoethyl)guanine	411	0.77
195	B4433		O6-(4-bromothenyl)-9-(2-phthalimidoethyl)guanine	499	0.25
196	B4434		O6-(4-bromothenyl)-9-(3-N-acetylglycyl)aminopropyl)guanine	482	0.34
197	B4435		O6-(4-bromothenyl)-9-(phthalimidomethyl)guanine	485	1.05
198	B4436		O6-(5-methoxybenzo[b]thien-2-ylmethyl)guanine	327	0.034
199	B4437		O6-(4-bromothenyl)-9-(2-aminoethyl)guanine hydrochloride	406	0.3
199-1			O6-(4-bromothenyl)-9-(2-aminoethyl)guanine	369	0.3
200	B4438		O6-(6-methoxybenzo[b]thien-2-ylmethyl)guanine	327	0.16
201	B4439		O6-(4-bromothenyl)-9-{3-[N'-(2-chloroethyl)-N'-nitrosoureido]propyl}guanine	518	0.515
202	B4440		O6-(4-bromothenyl)-9-[3-N1-methyl-N1-nitrosoureido)propyl]guanine	469	0.315
203	B4442		O6-(4-bromothenyl)-9-(3-trifluoroacetamidopropyl)guanine	479	0.58
204	B4443		O6-(4-bromothenyl)-9-(2-acetoxyethyl)guanine	412	0.11
205	B4444		O6-(4-bromothenyl)-9-(2-hydroxyethyl)guanine	370	0.15
206	B4445		O6-(4-bromothenyl)-9-[2-(N-acetylglycyl)aminoethyl]guanine	468	1.15
207	B4446		O6-(4-bromothenyl)-9-(4-hydroxybutyl)guanine	398	0.33
208	B4447		O6-benzyl-9-(3-phthalimidopropyl)guanine	428	5.5
209	B4448		O6-(4-bromothenyl)-9-[2-(N'-methyl-N'-nitrosoureido)ethyl]guanine	455	0.62
210	B4449		O6-(4-bromothenyl)-9-{3-[N'-(2-chloroethyl)-N'-nitrosoureido]ethyl}guanine	504	1
211	B4450		O6-benzyl-9-(3-acetamidopropyl)guanine	340	20
212	B4451		O6-(5-tert-butylfurfuryl)guanine	287	/
213	B4452		O4-benzyl-5,8-dideazapterin	251	/
214	B4453		O6-benzyl-9-(3-aminopropyl)guanine hydrochloride	335	9.8
214-1			O6-benzyl-9-(3-aminopropyl)guanine	298	9.8
215	B4454		O6-(4-bromothenyl)-9-(2-azidoethyl)guanine	395	0.08
216	B4455		O6-(4-bromothenyl)-9-(3-ethylenedioxypropyl)guanine	426	0.13
217	B4456		O6-(4-bromothenyl)-9-(3-cyanopropyl)guanine	393	0.16
218	B4457		O6-(4-bromothenyl)-9-(2-cyanoethyl)guanine	379	0.115
219	B4458	???	O6-(4-bromothenyl)-9-(4-azidobutyl)guanine	423	0.12
220	B4459		O6-(4-bromothenyl)-9-(3-fluoropropyl)guanine	386	0.075
221	B4460		O6-(4-bromothenyl)-9-(3-aminoethyl)guanine	369	23
222	B4461		O6-benzyl-9-(3-aminopropyl)guanine	289	102
223	B4462		O6-(4-bromothenyl)-9-(3-phenoxypropyl)guanine	460	0.036
224	B4222b		O6-(3-methylthenyl)guanine	261	150
225	B4463		O6-(4-methylthenyl)guanine	261	0.095
226	B4464		O4-(4-bromothenyl)-5,8-dideazapterin	336	160
227	B4465		O4-piperonyl-5,8-dideazapterin	295	172
228	B4466		O6-(4-bromothenyl)-9-(2,2,2-trifluoroethyl)guanine	408	0.19
229	B4467		O6-(4-bromothenyl)-9-(4,4,4-trifluorobutyl)guanine	436	0.08
230	B4468		O6-(4-bromothenyl)-9-(3-phenylpropyl)guanine	444	0.051
231	B4469		O6-(4-bromothenyl)-9-(cyanomethyl)guanine	365	0.042
232	B4470		O6-(4-bromothenyl)-9-propylguanine	368	0.156
233	B4471		O6-(4-bromothenyl)-9-(3-methylthiopropyl)guanine	414	0.0192
234	B4472		O6-benzyl-9-(3-phenoxypropyl)guanine	375	0.048
235	B4473		O6-(4-bromothenyl)-9-butylguanine	382	0.09
236	B4474		O6-(4-bromothenyl)-9-(4-phthalimido-2-thiabutyl)guanine	545	0.085
237	B4475		O6-(4-bromothenyl)-9-(4-phthalimidobutyl)guanine	527	0.075
238	B4476		O6-(4-bromothenyl)-9-(4-acetamidobutyl)guanine	439	0.5
239	B4477		O6-(4-bromothenyl)-9-(4-acetamido-2-thiabutyl)guanine	457	0.36
240	B4478		O4-thenyl-5,8-dideazapterin	257	/
241	B4479-1		O6-(4-bromothenyl)-9-(4-amino-2-thiabutyl)guanine	415	2.78
242	B4480		O6-(4-bromothenyl)-9-[3-(4-bromophenoxy)propyl]guanine	539	0.0195
243	B4481		O6-(4-bromothenyl)-9-allylguanine	366	0.053
244	B4482		O6-(4-bromothenyl)-9-(3-dimethylaminopropyl)guanine	411	0.16
245	B4483		O6-(4-iodobenzyl)guanine	367	0.045
246	B4484		O6-(4-bromothenyl)-9-(6-phthalimidohexyl)guanine	555	0.074
247	B4485		O6-(4-bromothenyl)-9-(6-acetamidohexyl)guanine	467	0.1045
248	B4486		O6-(4-bromothenyl)-9-[3-(2-naphthoxy)propyl]guanine	510	0.026
249	B4487		O6-(4-bromothenyl)-9-[3-(1-naphthoxy)propyl]guanine	510	0.27
250	B4488		O6-methyl-9-[3-(4-bromophenoxy)propyl]guanine	378	/
251	B4489		O6-(4-bromothenyl)-9-[6-(4-bromophenoxy)hexyl]guanine	581	0.26
252	B4490		O6-(4-bromothenyl)-9-(2-hydroxyethyl)-8-aza-7-deazaguanine	370	0.023
253	B4491		O6-(4-bromothenyl)-9-[3-(oestra-17-ol-3-yloxy)propyl]guanine	645	0.044
254	B4492		O6-(4-bromothenyl)-9-[6-(tetrachlorophthalimido)hexyl]guanine	693	0.54
255	B4493		O6-methyl-9-(6-phthalimidohexyl)guanine	394	/
256	B4494		O6-(4-bromothenyl)-9-[2-(4-bromophenoxy)ethyl]guanine	525	0.046
257	B4495		O6-methyl-9-(3-phthalimidopropyl)guanine	352	400
258	B4496		2-amino-O6-benzyloxy-4-[3-(4-bromophenoxy)propylamino]pyrimidine	429	8.8
259	B4497		2-amino-6-benzyloxy-4-[3-(4-bromophenoxy)propylamino]-5-nitrosopyrimidine	458	0.015
260	B4498		2-amino-4-[3-(4-bromophenoxy)propylamino]-6-(4-bromothenyloxy)pyrimidine	514	3
261	B4499		2-amino-4-[3-(4-bromophenoxy)propylamino]-6-(4-bromothenyloxy)5-nitrosopyrimidine	543	0.0124
262	B4500		O6-(4-bromothenyl)-9-(3-cyclohexyloxypropyl)guanine	466	0.0084
263	B4501		O6-(4-bromothenyl)-9-cinnamylguanine	442	0.13
264	B4502		O6-(4-bromothenyl)-9-(4-phenoxybutyl)guanine	474	0.16
265	B4503		O6-(4-bromothenyl)-9-(3-glycylaminopropyl) guanine	440	0.052
266	B4504		O6-(4-bromothenyl)-9-(3-methoxylpropyl) guanine	398	0.04
267	B4505		O6-(4-bromothenyl)-9-[3-(4-iodophenoxy)propyl] guanine	586	0.16
268	B4506		O6-(1,4-benzodioxan-6-yl)methyl guanine	323	/
269	B4507		O6-(Cyclohexylmethyl) guanine	247	/
270	B4508		O6-(4-bromothenyl)-9-[6-(trifluoroacetamido)hexyl]guanine	521	0.13
271	B4515		O6-(4-bromothenyl)-9-[6-(N'-methyl-N'-nitrosoureido)hexyl]guanine	511	0.1825
272	B4516		O6-(4-strylbenzyl)guanine	343	0.091
273	B4517		O6-(4-bromothenyl)-9-(3-orpholinopropyl)guanine	453	0.13
274	B4518		O6-(4-iodothenyl)guanine	373	0.017
275	B4519		O6 - (4-bromothenyl)-9-methylguanine	340	0.05
276	B4520		O6-(4-bromothenyl)-9-[3-(3-carbamoylphenoxy)propyl] guanine	503	0.1
277	B4521		N6-benzyl-2,6-diaminopurine	240	1000
278	B4522		O6-(4-bromothenyl)-9-(3-phenoxypropyl)-8-aza-7-deazaguanine	460	0.06
279	B4523		3-(3-bromopropoxy)benzamide monohydrate	276	7
279-2			3-(3-bromopropoxy)benzamide	258	7
280	B4524		O6-(4-bromothenyl)-9-(3-chloropropyl) guanine	402	0.08
281	B4525		O6-(4-bromothenyl)-9-(2-morpholinoethyl) guanine	439	0.5
282	B4526		O6-benzyl-9-(3-phenoxypropyl)-8-aza-7-deazaguanine	375	0.25
283	B4527		O6-piperonyl-9-(3-phenoxypropyl)-8-aza-7-deazaguanine	419	0.14
284	B4528		O6-thenyl-9-(3-phenoxypropyl)-8-aza-7-deazaguanine	381	0.04
285	B4529		1-[3-(N'-methyl-N'-nitrosoureido)propyl]imidazole	211	/
286	B4530		O6-(4-bromothenyl)-9-{6-[N'-(2-chloroethyl)-N'-nitrosoureido]hexyl}guanine	560	0.545
287	B4531		O6-(4-bromothenyl)-9-(benzyloxycarbonyl)guanine	460	0.007
288	B4532		O6-(4-bromothenyl)-9-(10-phthalimidodecyl)guanine	612	0.5065
289	B4534		O6-(4-bromothenyl)-9-(10-acetamidodecyl)guanine	524	0.0875
290	B4536		3-(3-azidopropoxy)benzamide	220	/
291	B4537		O6-(4-bromothenyl)-9-(8-phthalimido-3,6-dioxaoctyl) guanine	587	0.35
292	B4538		O6-(4-bromothenyl)-9-(piperonyloxycarbonyl) guanine	504	0.007
293	B4539		3-(3-aminopropoxy)benzamide hydrochloride	231	/
293-1			3-(3-aminopropoxy)benzamide	194	/
294	B4540		O6-(4-bromothenyl)-9-(2-aziridinoethyl) guanine	395	0.4
295	B4541		O6-(4-bromothenyl)-9-[3-(4-pyridyl)propyl] guanine	445	0.15
296	B4542		O6-(4-bromothenyl)-9-(morpholinecarbonyl) guanine	439	0.2
297	B4543		O6-(4-bromothenyl)-9-(dimethylcarbamoyl) guanine	397	0.05
298	B4544		O6-(4-bromothenyl)-9-(hexylcarbamoyl) guanine	453	0.013
299	B4545		3-(4-bromophenoxy)propyl bromide	294	95
300	B4546		4-phenoxybutyl bromide	229	46
301	B4547		3-phenoxypropyl bromide	215	60
302	B4548		2-(4-bromophenoxy)ethyl bromide	280	54
303	B4549		6-phthalimidohexyl bromide	310	27
304	B4550(rep)		O6-(4-bromothenyl)-9-[10-(N'-methyl-N'-nitrosoureido)decyl]guanine	567	0.345
305	B4551		O6-(4-bromothenyl)-9-(6-morpholinohexyl)guanine	495.5	0.225
306	B4552		6-(4-bromothenyloxy)-5-(4-chlorophenylazo)-2,4-diaminopyrimidine	440	0.4
307	B4553		6-benzyloxy-5-(4-chlorophenylazo)-2,4-diaminopyrimidine	355	0.5
308	B4554		10-phthalimidodecyl bromide	366	/
309	B4555		O6-(4-bromothenyl)-9-[6-(3-carbamoylphenoxy)hexyl]guanine	545	0.067
310	B4556		2-Amino-6-(4-bromothenyl)aminopurine	325	12.5
311	B4557		3-(6-chlorohexyloxy)benzamide	256	~200
312	B4558		O6-(4-bromothenyl)-9-(8-acetamido-3,6-dioxaoctyl)guanine	499	1.15
313	B4559		O6-(4-bromothenyl)-9-[3-(2-naphthoxy)propyl]-8-aza-7-deazaguanine	510	0.13
314	B4560		O6-benzyl-9-[3-(2-naphthoxy)propyl]-8-aza-7-deazaguanine	425	0.135
315	B4561		O6-benzyl-9-(methoxycarbonyl)-8-aza-7-deazaguanine	299	0.042
316	B4562		O6-(4-bromothenyl)-9-(methoxycarbonyl)-8-aza-7-deazaguanine	384	0.013
317	B4563		6-bromohexan(3-carbamoylanilide)	299	70
318	B4564		O6-(4-bromothenyl)-9-(cyclohexylcarbamoyl)guanine	451	0.095
319	B4565		6-bromohexan-[4-(2-hydroxyethyl)anilide]	314	70
320	B4566		O6-(4-bromothenyl)-7-[(2-phenylthio)ethyl]guanine	462	2.75
321	B4567		O6-(4-bromothenyl)-9-[(3-methylsulphonyl)propyl]guanine	446	0.5
322	B4568		3-bromopropylphthalimide	268	/
323	B4569		O6-(4-bromothenyl)-9-[(4-picolyloxy)carbonyl]guanine	461	0.01
324	B4570		3-(allyloxy)benzamide	177	/
325	B4571		O6-(4-bromothenyl)-9-(propylcarbamoyl)guanine	411	0.05
326	B4572		O6-(4-bromothenyl)-9-[(4-picolyl)carbamoyl]guanine	460	0.01
327	B4573		O6-(4-bromothenyl)-9-[N-(4-phthalimidobutyl)-N-(3-phthalimidopropyl)carbamoyl]guanine	758	0.038
328	B4575		O6-(4-bromothenyl)-9-(phenoxycarbonyl)guanine	446	0.005
329	B4576		2-amino-4-benzyloxy-6-(N'-hexylureido)-5-nitrosopyrimidine	372	0.006
330	B4577		O6-(4-bromothenyl)-9-(pipenonyloxycarbonyl)-8-aza-7-deazaguanine	504	0.057
331	B4578		O6-(4-bromothenyl)-9-(benzyloxycarbonyl)-8-aza-7-deazaguanine	460	0.006
332	B4579		O6- (4-bromothenyl)-9-(phenoxythionocarbonyl)guanine	462	0.009
333	B4580		4-bromobutyranilide	242	190
334	B4581		O6- (4-bromothenyl)-9-(cyclohexyloxycarbonyl)guanine	452	0.004
335	B4582		3-bromobutyl(3-carbamoylanilide)	271	230
336	B4583		acryl(3-carbamoylanilide)	190	750
337	B4584		O6-(4-bromothenyl)-9-[(picolyloxy)carbonyl]-8-aza-7-deazaguanine	461	0.004
338	B4585		acryl(4-carbamoylanilide)	190	/
339	B4586A		3-choloropropion(3-acetyllanilide)	226	40
340	B4586B		3-bromopropion(3-acetyllanilide)	270	30
341	B4588		O6-(4-bromothenyl)-9-(6-morpholinohexycarbonyl)guanine	523.45	0.006
342	B4589		O6-(4-bromothenyl)-9-(2-adamantyloxycarbonyl)guanine	504.24	0.008
343	B4590		3-Chloropropion(3-carbamoylanilide)	227	160
344	B4591		4-chlorobutyryl(3-carbamoylanilide)	241	150
345	B4592		3-bromopropion(4-carbamoylanilide)	271	160
346	B4593		4-bromobutyryl(3-acetylanilide)	284	40
347	B4594		3-bromopropion(2-carbamoylanilide)	271	240
348	B4595		O6-(4-bromothenyl)-9-{N-[4-(tert-butoxycarbonylamino)butryl]-N-[3-(tert-butoxycarbonylamino)propyl]carbamoyl}guanine	698	0.46
349	B4596		O6-(4-bromothenyl)-9-[N-methyl-N-(2-phthalimidoethyl)carbamoyl]guanine	556.4	0.23
350	B4598		Ethylenesulphonanilide	183	200
351	B4599		O6-(4-bromothenyl)-7-(dihydrotestosteronylcarbonyl)guanine	643	0.003
352	B4600		4-(4-Bromohetylyloxy)benzamide monohydrate	332	60
352-1			4-(4-Bromohetylyloxy)benzamide	314	60
353-1	B4601		O6-(4-bromothenyl)-9-(4-methylpiperazin-1-carbonyl)guanine	452	0.05
353-2	B4601C		B4601 Citrate dissolved in DMSO	644	0.08
353-3	B4601C		B4601 Citrate dissolved in water	644	0.09
353-4	B4601-M		B4601 maleate	568	0.25
353-5	B4601-P		B4601 Pamoic acid	1292	0.08
354	B4602		3-(4-bromobutyryloxy)acetophenone	285	20
355	B4603		O6-benzyl-9-methyl-8-aza-7-deazahypoxanthine	240	130
356	B4604		O6-piperonyl-9-methyl-8-aza-7-deazalypoxanthine	284	50
357	B4605		3-(4-chlorobutyryloxy)benzaldehyde	227	6000
358	B4606		O6(4-bromothenyl)-N-(cyclohexylcarbamoyl)-8-aza-7deazaguanine	451	1.5
359	B4607		O6(4-bromothenyl)-9-(morpholinocarbonyl)-8-aza-7-deazaguanine	439	0.03
360	B4608		O6-(4-bromothenyl)-9-(diphenylcarbonoyl)guanine	521	0.07
361	B4609		O6(4-bromothenyl)-9-(pyrolidinocarbonyl)guanine	423	0.5
362	B4610		4-(3-bromopropoxy)benzamide	258	120
363	B4611		N-[3-(3-bromopropoxy)penyl]urea	273	34
364	B4612		O6-(4-bromothenyl)-9-(4-benzylpiperazin-1-carbonyl)guanine	528	0.28
365-1	B4616-HCL		O6-(4-bromothenyl)-9[(3-monopholinopropyl)carbamoyl]guanine hydrochloride	533	0.015
365-2	B4616- N		B4616Naphthoquinone salt	734	0.03
365-3	B4616		O6-(4-bromothenyl)-9[(3-monopholinopropyl)carbamoyl]guanine hydrochloride	496	0.0225
366	B4617		O6-(4-methylthiobenzyl)-9-hexylcarbamoyl-guanine	414	0.6
367	B4618		O6-piperonyl-9-hexylcarbamoyl-guanine	412	0.84
368-1	B4619		O6-(4bromothenyl)-9-(1-methyl-4-piperidyloxycarbonyl)guanine	467	0.004
368-2	B4619C		B4619Citrate	659	0.007
369	B4620		O6-piperonyl-9-phenoxycarbonyl-guanine	405	0.03
370	B4621		N-[2-amino-4-(4-bromothenyloxy)-5-nitrosopyrimidin-6-yl]-N'-hexylurea	457	0.023
371	B4622		N-[2-amino-4-(4-bromothenyloxy)pyrimidin-6-yl]-N'-hexylurea	428	0.3
372	B4623		N-(2-amino-4-benzyloxypyrimidin-6-yl]-N'-hexylurea	343	6
373	B4624		O6-piperonyl-9-(propoxycarbonyl)guanine	371	0.02
374-1	B4625		O6-(4-bromothenyl)-9[(1-methyl-4-piperidylcarbamoyl]guanine	466	0.005
374-2	B4625C		citrate salt of O6-(4-bromothenyl)-9[(1-methyl-4-piperidylcarbamoyl)]guanine	659	0.0096
375	B4627		O6-(4bromothenyl)-9-(3-ethoxypropoxycarbonyl)guanine	456	0.0043
376	B4628		O6-(4bromothenyl)-9-[N-(3-ethoxypropyl)carbamoyl]guanine	455	0.03
377	B4629		O6-(4bromothenyl)-9-(oestradiol-17-oxycarbonyl)guanine	624	0.017
378	B4630		O6-(4-fluorobenzyl)-8-oxoguanine	275	0.083
379	B4631		5-(4-bromothenylamino)-2,4-diaminopyrimidine-6-one	316	4.2
380	B4632		O6-(4-bromothenyl)-9-(4-piperidinopiperidonocarbonyl)guanine	520	0.27
381	B4633		O6-(4-bromothenyl)-9-(4-nitrobenzyloxycarbonyl)guanine	505	0.0047
382	B4634		O6-(4bromothenyl)-9-(6-dimethylaminohexyloxycarbonyl)guanine	497	0.0046
383	B4635		O6-(4bromothenyl)-9-(3-piperidinopropoxycarbonyl)guanine	495	0.0047
384	B4636		O6-(4bromothenyl)-9-(N-methoxycarbamoyl)guanine	399	0.026
385	B4637		O6-(4-fluorobenzyl)-9-(hexyloxycarbonyl)-8-oxoguanine	431	0.085
385-1	B4637MIX	???	7 and 9 isomer mix of 4637	431	0.019
386	B4638		O6-(4bromothenyl)-9-(propoxycarbonyl)guanine	412	0.0036
387	B4639		O6-(4bromothenyl)-N7-carboxy(oestradiol-17-oxy)guanine	624	0.0065
388	B4640		2-amino-4-octyloxycarbonylamino-5-nitroso-6-(4-bromothenyloxy)pyrimidine	486	10
389	B4641		O6-(4-fluorobenzyl)-8-oxoguanine	275	0.14
390	B4642		O6-(4-bromothenyl)-9-dimethylcarbamoyl-8-aza-7deazaguanine	397	0.0045
391	B4643		O6-(4-bromothenyl)-9-diphenylcarbamoyl-8-aza-7deazaguanine	521	0.0047
392	B4645		O6-(4bromothenyl)-9-(10-aminodecyl)guanine	481	/
393	B4646		O6-(4-bromothenyl)-9-(hexylcarbamoyl)-8-aza-7deazaguanine	453	0.024
394	B4647		O6-(4-bromothenyl)-9-(3-ethoxypropylcarbamoyl)-8-aza-7deazaguanine	455	0.0041
395	B4648		O6-(4-bromothenyl)-9-(N-cyclohexylcarbamoyl)-8-aza-7deazaguanine	451	0.0586
396	B4649		O6-(4-bromothenyl)-9-[N-(3-ethoxypropyl)carbamoyl]-8-aza-7deazaguanine	455	0.0336
397	B4650		O6-(4-bromothenyl)-9-[N-(3-morpholinopropyl)carbamoyl]-8-aza-7deazaguanine	496	0.0218
397-2	B4650.HCl		O6-(4-bromothenyl)-9-[N-(3-morpholinopropyl)carbamoyl]-8-aza-7deazaguanine	533	0.052
398	B4651		O6-(4-bromothenyl)-9-morpholinocarbonyl]-8-aza-7deazaguanine	439	0.096
399	B4652		O6-(4-bromothenyl)-9-(4-benzylpiperazin-1-carbonyl)-8-aza-7deazaguanine	528	0.0255
399-2	B4652.Cit		O6-(4-bromothenyl)-9-(4-benzylpiperazin-1-carbonyl)-8-aza-7deazaguanine	721	0.05
400	B4653		O6-(4-bromothenyl)-9-(4-piperidinopiperidinocarbonyl)-8-aza-7deazaguanine	520	0.0448
400-2	B4653.HCl		O6-(4-bromothenyl)-9-(4-piperidinopiperidinocarbonyl)-8-aza-7deazaguanine	557	0.03
401	B4644		O6-(4-bromothenyl)-9-(pyrididinocarbonoyl)-8-aza-7deazaguanine	423	0.0025
402	B4654		O6-(4-bromothenyl)-8-(phenoxycarbonyl)-8-aza-7deazaguanine	446	0.00182
403	B4655		O6-(4-bromothenyl)allohypoxanthine	311	0.14
404	B4656		O6-benzylallohypoxanthine	226	2.93
405	B4658		O6-(4-methylsulphonylbenzyl)-9-(piperonyloxycarbonyl)guanine	497.48	0.172
406	B4659		O6-(4-bromothenyl)-N2- (hexylcarbamoyl)-8-aza-7deazaguanine	453	0.24
407	B4660		O6-(4-bromothenyl)-9-(1-methyl-4-piperidyloxycarbonyl)-8-aza-7deazaguanine	467	0.003
408	B4661		O6-(4-bromothenyl)-9-(4-methylpiperazinyl-1-carbonyl)-8-aza-7deazaguanine	452	0.022
409	B4662		O6-(4-bromothenyl)-9-(phenoxycarbonyl)-8-aza-7deazaguanine	446	0.004
410	B4663		O6-(4-bromothenyl)-9-(propoxycarbonyl)-8-aza-7deazaguanine	412	0.006
411	B4664		O6-(4-bromothenyl)-8-(propoxycarbonyl)-8-aza-7deazaguanine	412	0.003
412	B4665		O6-(4-bromothenyl)-9-(N-phenylcarbamoyl)-8-aza-7deazaguanine	445	0.006
413	B4666		O6-(4-bromothenyl)-9-{10-[N'-(2-chloroethyl)-N'-nitrosoureido]decyl}-guanine	616	0.419
414	B4669		O6-(4'-Bromothenyl)-9-(N,N-dimethylaminocarbamoyl)-8-aza-7-deazaguanine alloPaTrin-2-dimethylhydrazine	412	0.058
415	B4672		O6-(4-bromothenyl)-9-(4-nitrobenzyloxymethyl)guanine	491	0.176
416	B4673		O6-(4-bromothenyl)-9-(N-methoxycarbamoyl)-8-aza-7deazaguanine	399	0.0355
417-1	B4674		O6-(4-bromothenyl)-9-[N-(4-methyl-1-piperazinyl)carbamoyl]-8-aza-7deazaguanine	467	0.0584
417-2	B4674C		B4674 Citrate salt	659	0.0801
418	B4675		O6-(4-bromothenyl)-9-(6-aminohexyl)guanine	425	0.93
419	B4676		O6-(4-bromothenyl)-9-benzylguanine	416	1.65
420	B4677		O6-(4-bromothenyl)-9-[(6-nitropiperonyl)oxycarbonyl]-guanine	549	~0.004
421	B4678		O6-(4-bromothenyl)-9-[(6-nitroveratryl)oxycarbonyl]-guanine	565	~0.003
422			6-nitroveratryl alcohol	213	/
423			6-nitropiperonyl alcohol	197	/
424	B4679		O6-(4-bromothenyl)-9-(anisyloxymethyl)guanine	462	~0.12uM
425	B4680		O6-(4-bromothenyl)-9-(piperonyloxymethyl)guanine	490	~0.44uM
426	B4681		O6-(4-bromothenyl)-9-[(+)-menthyloxycarbonyl]guanine	508	0.017
427	B4682		O6-(4-bromothenyl)-9-[10-(4,5-methylenedioxy-2-nitrobenzyloxycarbonylamine)decyl]-guanine	705	0.18
428	B4670		O6-(4'-Bromothenyl)-9-(+)menthyloxymethylguanine	494	2.3
429	B4671		O6-(4'-Bromothenyl)-9-(-)menthyloxymethylguanine	494	1.7
430	B4683		O6-(4-bromothenyl)-7-(3-aminopropyl)guanine	383	4
431	B4684		O6-(4-bromothenyl)-7-(ethoxymethyl)guanine	384	2.16
432	B4685		O6-(4-bromothenyl)-9-(10-carboxydecyl)guanine	510	0.056
433	B.4688		2-Amino-4-(4-bromothenyl)oxy-6-morpholino-5-nitropyrimidine	416	19
434	B.4689		2-Amino-4-benzyloxy-6-morpholino-5-nitropyrimidine	331	1
435	B4691		2-Amino-4-(4-bromothenyloxy)-6-[N-(4-(4-aminophenylamino)anilino)]-5-nitropyrimidine	528	4.7
436	B4692		2-Amino-4-benzyloxy-6-[N-(4-(4-aminophenoxy)anilino)]-5-nitropyrimidine	444	/
437	B4693		2-Amino-4-(4-bromothenyloxy)-6-[N-(4-(4-aminophenoxy)anilino)]-5-nitropyrimidine	529	~13
438	B4667		O6-(4-bromothenyl)-9-(phenoxycarbonyl)-8-aza-7-deazapurine	431	6.6

## Sheet: Table S2
Table S2. Statistical parameters used for internal and external validation in this study.
Parameters	Meaning	References
R2	Coefficient of determination	Golbraikh et al. J. Mol. Graph. Model., 2002, 20, 269-276.; Golbraikh A. et al. J. Comput.-Aided Mol. Des., 2003, 17, 241-253.; Tropsha et al. QSAR Comb. Sci., 2003, 22, 69-77.; Gramatica P. QSAR Comb. Sci., 2007, 26, 694-701.; Tropsha, A. Mol. Inf., 2010, 29, 476-488.
Radj2	Adjusted coefficient of determination
RMSEtr	Root mean squared error of the training set
F	Fisher statistics
QLOO2	Leave-one-out cross-validation correlation coefficient
QLMO2	Leave-many-out cross-validation correlation coefficient
RMSEcv	Cross-validation root mean squared error
RYscr2 and QYscr2	New coefficients of determination following Y-scrambling procedure with 2000 iterations
R02	The squared correlation coefficient of predicted values vs. experimental values based on the regression line through the origin
R'02	The squared correlation coefficient of experimental values vs. predicted values based on the regression line through the origin
k	The slope of the regression line through the origin (predicted values vs. experimental values)
k'	The slope of the regression line through the origin (experimental values vs. predicted values)
CCCcv	Cross-validation concordance correlation coefficient	Lin L. Biometrics, 1989, 45, 255-268; Lin L. Biometrics 1992, 48, 599-604.
CCCtr	Concordance correlation coefficient of the training set
QUIK rule	Minimizes the inter-correlation between descriptors	Todeschini et al. Chemom. Int. Lab. Syst., 1999, 46, 13-29
Rpr2	Coefficient of determination of the prediction set	Golbraikh et al. J. Mol. Graph. Model., 2002, 20, 269-276.
RMSEpr	Root mean squared error of the prediction set	Aptula et al. QSAR Comb. Sci. 2005, 24, 385-396.
QF12	External Q2 functions	Shi et al. J. Chem. Inf. Comput. Sci., 2001, 41, 186-195.
QF22	External Q2 functions	Consonni et al. J. Chem. Inf. Model., 2009, 49, 1669-1678.
QF32	External Q2 functions
CCCpr	Concordance correlation coefficient of the prediction set	Chirico et al. J. Chem. Inf. Model., 2011, 51, 2320-2335.; Chirico et al. J. Chem. Inf. Model., 2012, 52, 2044-2058.
MAEtrain	Mean absolute error of the training set	Roy et al. Chemom. Int. Lab. Syst., 2016, 152, 18-33.；Gramatica et al. J. Chem. Inf. Model. 2016, 56(6), 1127-1131.
MAEpr	Mean absolute error of the prediction set
SD	Standard deviation
rm2 and Δrm2	Validation metrics	Ojha et al. Chemom. Int. Lab. Syst., 2011, 107, 194-205.;Roy et al. J. Chemom. 2018, 32, e2992.

## Sheet: Table S3-Modelling Dataset
Table S3. The detailed results of the modelling dataset
No.	Inactivator Name	MW	MGMT inactivation IC50 (μM)	Experimental pIC50	Predicted pIC50	Predicted Residuals	HAT i/i (h*=0.1075)	Std.Pred.Mod.Eq. Res.	ALogP	Division in the best model
1	O6-allylguanine	191.22	22	4.65758	6.1016	1.444	0.027	1.8712	-0.6053	Training
2	O6-benzylguanine	241.28	0.04	7.39794	6.5657	-0.8322	0.014	-1.0712	-1.3128	Training
5	O6-thienylmethylguanine.1MeOH	247.31	0.024	7.61979	7.0912	-0.5286	0.0173	-0.6815	-0.7222	Prediction
6	O6-furylmethylguanine	231.24	0.115	6.9393	6.3643	-0.575	0.028	-0.7454	-1.4669	Prediction
8	O6-(3-picolyl)guanine.1/2H2O	242.27	0.43	6.36653	6.803	0.4365	0.0226	0.5643	-1.3128	Training
9	O6-piperonylguanine.3/4H2O	285.29	0.02	7.69897	7.1025	-0.5964	0.0371	-0.7769	-1.6155	Training
10	O6-(2-naphthylmethyl)guanine	291.34	0.15	6.82391	6.6676	-0.1563	0.0248	-0.2023	-1.3128	Training
13	O6-(2-methylbenzyl)guanine	255.31	58	4.23657	6.3328	2.0963	0.0183	2.7043	-0.6708	Training
15	O6-(5-methylthenyl)guanine	261.34	9	5.04576	6.7984	1.7527	0.0559	2.3057	-0.2827	Training
16	O6-(5-methylfuryl)guanine.1/2H2O	231.24	10	5	6.1223	1.1223	0.0442	1.4673	-1.039	Prediction
17	O6-(3-methylthenyl)guanine	261.34	0.65	6.18709	6.3465	0.1595	0.0607	0.2103	-0.0802	Prediction
18	O6-(2-benzo[b]thienylmethyl)guanine.1MeOH	297.37	0.03	7.52288	7.2407	-0.2821	0.0103	-0.3625	-0.7222	Training
21	O6-(5-methoxycarbonylfurfuryl)guanine.3/2H2O	289.28	0.09	7.04576	7.0073	-0.0385	0.0418	-0.0503	-1.4557	Training
24	O6-benzyl-8-oxaguanine	243.25	0.25	6.60206	7.0093	0.4073	0.0214	0.5263	-1.0465	Training
33	O6-benzyl-8-azaguanine	242.27	0.075	7.12494	7.1608	0.0358	0.0233	0.0463	-1.3128	Training
34	O4-benzyl-6,7-dimethylpterin	281.35	0.23	6.63827	6.3366	-0.3017	0.044	-0.3944	-0.0134	Training
37	O4-benzylpterin	253.29	0.07	7.1549	6.4727	-0.6822	0.0164	-0.8793	-0.8924	Training
39	O6-(2-benzofuranylmethyl)guanine.1MeOH	281.3	0.035	7.45593	6.8091	-0.6468	0.0212	-0.8357	-1.4669	Training
40	O4-(4-fluorobenzyl)benzyl)-6,7-dimethylpterin	299.34	0.4	6.39794	5.9638	-0.4341	0.0697	-0.5753	0.4663	Training
41	O6-piperonylguanosine.2H2O	417.42	0.75	6.12494	6.3849	0.2599	0.0676	0.344	-2.7243	Training
42	O6-(5-bromothenyl)guanine	326.2	0.0045	8.34679	7.2537	-1.0931	0.0129	-1.4063	0.023	Training
43	O6-(4-fluorobenzyl)-8-azaguanine	260.26	0.08	7.09691	7.2025	0.1056	0.0249	0.1367	-0.8331	Training
44	O6-(3-azapiperonyl)guanine.2H2O	288.3	0.23	6.63827	6.5653	-0.0729	0.0171	-0.094	-1.2511	Training
45	O6-(4-fluorobenzyl)-8-oxaguanine	261.24	0.02	7.69897	7.1331	-0.5659	0.0253	-0.7326	-0.5668	Training
46	O6-(5-cyanofurfuryl)guanine.1H2O	256.25	0.006	8.22185	7.0439	-1.1779	0.0263	-1.5259	-1.4322	Prediction
47	O6-(5-oxazolylmethyl)guanine.1/4H2O	232.23	0.35	6.45593	6.4217	-0.0342	0.031	-0.0444	-1.4669	Prediction
48	O6-(5-thiazolylmethyl)guanine.1/2H2O	248.3	0.033	7.48149	7.1273	-0.3542	0.0203	-0.4574	-0.7222	Training
49	O6-(2-benzo[b]thienylmethyl)guanosine.1H2O	429.5	0.35	6.45593	6.9193	0.4633	0.0122	0.5959	-1.831	Training
50	O6-(4-picolyl)guanine	242.27	0.13	6.88606	6.262	-0.6241	0.0162	-0.8043	-1.3128	Training
51	O6-(1-methyl-4-nitropyrrol-2-ylmethyl)guanine.1/2H2O	289.29	0.55	6.25964	6.2257	-0.034	0.0343	-0.0442	-1.0838	Prediction
52	O6-thenylguanosine.1/2H2O	379.44	0.9	6.04576	6.8379	0.7921	0.0106	1.0179	-1.831	Training
53	O6-(4-bromothenyl)guanine	326.2	0.0034	8.46852	7.2629	-1.2056	0.0131	-1.5512	0.1666	Training
54	O6-(5-chlorothenyl)guanine	281.75	0.004	8.39794	7.1849	-1.2131	0.0136	-1.5612	-0.1885	Training
55	O6-(1-oxido-3-picolyl)guanine.1H2O	258.27	1.4	5.85387	6.6308	0.777	0.0154	1.0009	-1.7599	Training
56	O6-(5-cyanothenyl)guanine	272.32	0.005	8.30103	8.0605	-0.2405	0.048	-0.315	-0.6875	Prediction
57	O6-(2-fluorobenzyl)guanine	259.27	6	5.22185	6.8237	1.6018	0.0373	2.0867	-0.8331	Training
58	O6-(4-chlorobenzyl)-8-oxaguanine	277.69	0.225	6.64782	6.9975	0.3497	0.019	0.4513	-0.3022	Training
59	O6-(4-fluorobenzyl)-8-thiaguanine	277.31	0.03	7.52288	6.6817	-0.8411	0.0156	-1.0836	0.1779	Prediction
60	O6-(4-bromothenyl)-8-oxaguanine	328.17	0.24	6.61979	7.7394	1.1196	0.0253	1.4495	0.4329	Training
61	O6-(4-bromothenyl)pterin	338.21	0.025	7.60206	7.2857	-0.3163	0.0117	-0.4067	0.587	Training
62	O6-(4-bromothenyl)-8-azaguanine	327.19	0.045	7.34679	7.8599	0.5131	0.0219	0.6632	0.1666	Training
63	O6-(4-fluorobenzyl)pterin	271.28	0.088	7.05552	6.7824	-0.2731	0.0166	-0.352	-0.4127	Training
64	O6-thenylhypoxanthine	232.29	1.9	5.72125	5.8557	0.1344	0.0523	0.1765	0.0277	Training
65	O6-(4-bromothenyl)hypoxanthine	311.18	0.3	6.52288	6.0417	-0.4812	0.0472	-0.6301	0.9165	Training
66	O6-furfurylhypoxanthine	216.22	28	4.55284	5.2362	0.6833	0.0636	0.9026	-0.717	Training
67	O6-(5-methylsulphinylthenyl)guanine	309.41	0.03	7.52288	7.2562	-0.2666	0.0122	-0.3429	-1.1411	Training
69	O6-benzyl-8-thiaguanine	259.32	0.02	7.69897	6.5124	-1.1866	0.014	-1.5274	-0.3018	Training
70	O6-benzyl-2-fluorohypoxanthine	244.25	5.8	5.23657	5.5058	0.2692	0.0522	0.3535	-0.46	Training
71	O6-(4-chlorothenyl)guanine	281.75	0.008	8.09691	7.2052	-0.8918	0.014	-1.1479	0.0221	Training
72	O6-(4-chlorothenyl)-8-oxaguanine	283.72	0.243	6.61439	7.7359	1.1215	0.0271	1.4533	0.2884	Training
73	O6-(4-methoxythenyl)guanine	277.34	0.0165	7.78252	7.234	-0.5485	0.0313	-0.7124	-0.774	Training
74	2,4-diamino-6-(4-fluorobenzyloxy)-5-nitrosopyrimidine	263.26	0.0175	7.75696	6.8422	-0.9148	0.046	-1.1972	-1.1859	Training
75	2,4-diamino-6-(4-chlorothenyloxy)pyrimidine	256.74	0.17	6.76955	6.5783	-0.1912	0.0458	-0.2503	-0.3074	Training
76	2,4-diamino-6-(piperonyloxy)pyrimidine	260.28	0.8	6.09691	6.3915	0.2946	0.0639	0.3891	-1.945	Training
77	2,4-diamino-6-(4-chlorobenzyloxy)pyrimidine	250.71	5	5.30103	5.873	0.572	0.0457	0.7485	-0.898	Training
78	2,4-diamino-6-(4-fluorobenzyloxy)pyrimidine	234.26	4	5.39794	6.0266	0.6287	0.0516	0.8252	-1.1626	Training
79	2,4-diamino-6-thenyloxy-5-nitropyrimidine	267.3	2.3	5.63827	6.5612	0.923	0.0437	1.2064	-0.3916	Training
80	2,4-diamino-6-thenyloxypyrimidine	222.3	0.4	6.39794	6.4846	0.0866	0.0499	0.1136	-1.0517	Prediction
81	2,4-diamino-5-nitro-6-(piperonyloxy)pyrimidine	305.28	0.5	6.30103	6.5144	0.2134	0.0597	0.2813	-1.2849	Training
82	O6-(5-methylsulphonylthenyl)guanine	325.41	0.072	7.14267	7.3076	0.165	0.0115	0.2121	-1.0451	Prediction
83	O6-benzyl-7-deaza-8-azaguanine	241.28	0.01	8	6.9725	-1.0275	0.0229	-1.3287	-1.3128	Training
84	2,4-diamino-6-(4-chlorothenyloxy)-5-nitrosopyrimidine	285.74	0.009	8.04576	7.4318	-0.6139	0.0457	-0.8033	-0.3307	Training
85	2,4-diamino-6-(4-bromothenyloxy)-5-nitrosopyrimidine	330.19	0.045	7.34679	7.4763	0.1295	0.0452	0.1694	-0.1862	Training
86	O6-(5-bromo-3-thienylmethyl)guanine	326.2	0.0065	8.18709	6.5707	-1.6164	0.0142	-2.081	0.023	Training
87	O6-(4-chlorothenyl)-8-azaguanine	282.74	0.011	7.95861	7.7872	-0.1714	0.0214	-0.2215	0.0221	Prediction
88	O6-(4-chlorothenyl)-8-thiaguanine	299.79	0.006	8.22185	7.0958	-1.1261	0.0153	-1.4505	1.0331	Training
89	O6-(4-chlorothenyl)pterin	293.76	0.025	7.60206	7.2444	-0.3576	0.0128	-0.4601	0.4425	Training
90	O6-(4-cyanothenyl)guanine	272.32	0.0028	8.55284	7.7413	-0.8115	0.0209	-1.0483	-0.6875	Training
91	O6-(4,5-dichlorothenyl)guanine	316.19	0.015	7.82391	7.2344	-0.5896	0.0109	-0.7577	0.5558	Training
92	O6-(6-chloro-3-picolyl)guanine	276.71	0.2	6.69897	6.6191	-0.0798	0.0145	-0.1028	-0.7791	Training
93	O6-(5-bromo-3-picolyl)guanine	321.16	0.25	6.60206	6.7096	0.1075	0.0166	0.1386	-0.424	Training
94	O6-(2-chloro-4-picolyl)guanine	276.71	0.04	7.39794	6.3479	-1.0501	0.0164	-1.3534	-0.7791	Prediction
95	O6-benzyl-9-(2-hydroxyethoxymethyl)guanine	315.37	8	5.09691	6.2063	1.1093	0.0236	1.435	-1.4649	Training
96	O6-(4-bromothenyl)-9-(2-hydroxyethoxymethyl)guanine	400.29	0.33	6.48149	6.9645	0.483	0.0141	0.6218	0.0145	Training
97	O6-(5-bromofurfuryl)guanine	310.13	0.02	7.69897	6.5099	-1.1891	0.0224	-1.5372	-0.7217	Prediction
98	O6-(4-bromothenyl)-8-aza-7-deazaguanine	326.2	0.007	8.1549	7.7253	-0.4296	0.0221	-0.5553	0.1666	Training
99	O6-thenyl-7-deaza-8-azaguanine	247.31	0.01	8	7.6084	-0.3916	0.0203	-0.5057	-0.7222	Training
100	O6-(4-chlorobenzyl)-7-deaza-8-azaguanine	275.72	0.02	7.69897	6.8687	-0.8303	0.0227	-1.0735	-0.5685	Training
101	O6-(4-fluorobenzyl)-7-deaza-8-azaguanine	259.27	0.018	7.74473	7.005	-0.7397	0.0242	-0.9572	-0.8331	Training
102	O6-(4-bromothenyl)-9-(dihydrotestosteronylcarbonylmethyl)guanine	656.71	0.22	6.65758	6.5676	-0.09	0.0324	-0.1169	0.2318	Training
103	O6-(4-bromothenyl)-9-(oestra-3-ol-17-ylcarbonylmethyl)guanine	628.7	0.32	6.49485	6.7911	0.2962	0.0175	0.382	0.0563	Training
104	O6-piperonyl-7-deaza-8-azaguanine	285.29	0.0065	8.18709	7.4584	-0.7287	0.0343	-0.9478	-1.6155	Training
105	O6-benzyl-9-(methoxycarbonyl)guanine	299.32	0.15	6.82391	6.9022	0.0782	0.0257	0.1013	-0.8741	Prediction
106	O6-(4-bromothenyl)-9-(ethoxycarbonylmethyl)guanine	412.3	0.23	6.63827	6.9972	0.3589	0.0165	0.4625	0.66	Prediction
107	O6-(4-bromothenyl)-9-(methoxycarbonyl)guanine	384.24	0.0048	8.31876	7.6332	-0.6855	0.0195	-0.8849	0.6053	Training
108	O6-benzyl-2-methylhypoxanthine	240.29	75	4.12494	5.0181	0.8932	0.0406	1.1656	-0.5116	Training
109	O6-furfuryl-8-aza-7-deazaguanine	231.24	0.036	7.4437	6.6588	-0.7849	0.0236	-1.0152	-1.4669	Prediction
110	O6-(4-bromothenyl)-8-hydroxyguanine	342.2	0.018	7.74473	7.3791	-0.3656	0.0138	-0.4706	-0.2937	Training
111	O6-thenyl-2-methylhypoxanthine	246.32	14	4.85387	5.5799	0.7261	0.0447	0.9495	0.079	Training
112	O6-(4-bromothenyl)-8-thiaguanine	344.24	0.0028	8.55284	7.1192	-1.4336	0.0135	-1.8449	1.1776	Training
113	S6-(4-bromothenyl)-6-thioguanine	342.27	8	5.09691	5.7817	0.6848	0.0285	0.888	0.9113	Training
114	O6-(4-bromothenyl)-2-fluorohypoxanthine	329.17	1.4	5.85387	6.1654	0.3116	0.0532	0.4093	1.0194	Prediction
115	O6-(4-isothiazolmethyl)guanine	248.3	0.07	7.1549	6.4925	-0.6624	0.0146	-0.853	-0.7222	Training
116	O6-(3-bromobenzyl)guanine	320.17	0.022	7.65758	6.7637	-0.8939	0.0167	-1.1523	-0.424	Training
117	O6-(4-methylthiothenyl)guanine	293.41	0.0095	8.02228	7.0728	-0.9495	0.0146	-1.2226	-0.0293	Prediction
118	O6-(5-iodo-3-thienylmethyl)guanine	373.2	0.009	8.04576	6.5667	-1.4791	0.0153	-1.9052	0.425	Training
119	O6-(4-bromothenyl)-9-(dihydrotestosteronylcarbonyl)guanine	642.68	0.025	7.60206	6.6332	-0.9689	0.0325	-1.2591	0.0494	Training
120-1	O6-(4-bromothenyl)-9-(carboxymethyl)guanine	384.24	0.5	6.30103	7.0001	0.6991	0.0147	0.9002	0.1586	Training
121	O6-(4-bromothenyl)-9-(5-ethoxycarbonylpentyl)guanine	468.42	0.24	6.61979	6.8938	0.274	0.0138	0.3526	0.0442	Prediction
122	O6-(4-methylsulphonylthenyl)guanine	325.41	0.2	6.69897	7.1732	0.4742	0.0123	0.6099	-1.0451	Prediction
124	O6-(4-bromothenyl)guanosine	458.33	0.08	7.09691	6.8361	-0.2608	0.0101	-0.335	-0.9422	Prediction
125	2-amino-4-methoxycarbonylamino-5-nitroso-6-(4-bromothenyloxy)pyrimidine	388.23	0.15	6.82391	7.9761	1.1522	0.0252	1.4917	0.582	Training
126	4-acetamido-2-amino-5-nitroso-6-(4-bromothenyloxy)pyrimidine	372.23	0.045	7.34679	6.9824	-0.3644	0.0214	-0.4708	-0.0612	Prediction
127	O6-(naphtho[2,1-b]thiophen-2-ylmethyl)guanine	347.43	0.05	7.30103	7.1576	-0.1434	0.0138	-0.1846	-0.7222	Training
128	O6-(4-bromothenyl)-9-(methoxycarbonylmethyl)guanine	398.27	0.25	6.60206	6.7005	0.0984	0.0285	0.1277	0.4096	Training
129	O6-(4-bromothenyl)-9-(b-D-arabinofuranosyl)-guanine	458.33	0.115	6.9393	6.7605	-0.1788	0.0115	-0.2299	-0.9422	Training
130	O6-(4-bromothenyl)-9-(ethoxymethyl)guanine	384.29	0.28	6.55284	6.8438	0.2909	0.0109	0.3739	0.8043	Training
131	O6-(4-bromothenyl)-9-(octyloxymethyl)guanine	468.47	1.2	5.92082	6.8821	0.9613	0.0105	1.2352	-1.2135	Prediction
132	O6-(4-bromothenyl)-9-(3-hydroxypropyl)guanine	384.29	0.15	6.82391	6.5566	-0.2673	0.017	-0.3446	-0.1249	Training
134	O6-(4-azidothenyl)guanine	288.33	0.0063	8.20066	9.0033	0.8026	0.121	1.0943	-1.2335	Training
138	O6-(4-methylsulphinylthenyl)guanine	309.41	0.15	6.82391	7.2633	0.4394	0.0158	0.5662	-1.1411	Training
139	O6-(5-phenylthenyl)guanine	323.41	0.75	6.12494	7.0897	0.9648	0.0187	1.2449	-0.7222	Training
140	O6-(4-bromothenyl)-2-deoxyguanosine	442.33	0.095	7.02228	6.6408	-0.3815	0.0127	-0.4907	-0.7195	Training
141	O6-(4-bromobenzyl)guanine	320.17	0.15	6.82391	6.4429	-0.381	0.015	-0.4907	-0.424	Prediction
142	O2-(4-bromothenyl)-5-nitrocytosine	331.17	50	4.30103	5.7744	1.4734	0.0412	1.9233	1.2471	Training
144	2-amino-4-(4-bromothenyloxy)-5-nitropyrimidine	331.17	0.32	6.49485	6.7349	0.24	0.027	0.311	1.2471	Prediction
145	O6-(naphtho[1,2-b]thiophen-2-ylmethyl)guanine	347.43	0.22	6.65758	7.0603	0.4027	0.0166	0.5191	-0.7222	Training
146	2,4-diamino-6-(4-bromothenyloxy)pyrimidine	301.19	0.27	6.56864	6.4883	-0.0803	0.0492	-0.1053	-0.1629	Training
147	2,4-diamino-6-(naphtho[1,2-b]thiophen-2-ylmethoxy)pyrimidine	322.42	6.5	5.18709	6.2996	1.1125	0.0387	1.4503	-1.0517	Training
148	2,4-diamino-6-(benzo[b]thien-2-ylmethoxy)pyrimidine	272.36	0.15	6.82391	6.5323	-0.2916	0.0399	-0.3804	-1.0517	Training
151	O6-(1-methylimidazol-5-ylmethyl)guanine	245.28	8.5	5.07058	6.0697	0.9992	0.0379	1.302	-1.7439	Training
154	2,4-diamino-6-(5-methylthenyloxy)pyrimidine	236.33	2.7	5.56864	6.4678	0.8991	0.0666	1.1896	-0.6122	Prediction
155	O6-(3-phenylbenzyl)guanine	317.38	0.019	7.72125	6.2577	-1.4635	0.03	-1.8993	-1.3128	Training
156	O6-(6-methoxynaphth-2-ylmethyl)guanine	321.37	0.011	7.95861	6.6217	-1.3369	0.0243	-1.73	-1.3646	Training
157	O6-(10-methylphenothiazin-3-ylmethyl)guanine	376.48	0.09	7.04576	6.6542	-0.3916	0.0281	-0.5077	-0.6067	Prediction
158	O6-(4-bromothenyl)-N,7-diacetylguanine	410.28	62	4.20761	6.001	1.7934	0.055	2.358	0.0871	Training
159	N2-acetyl-O6-(4-bromothenyl)guanine	368.24	2.6	5.58503	5.6764	0.0913	0.0524	0.1199	0.2916	Training
160	O6-(4-methylthiobenzyl)guanine	287.38	0.024	7.61979	6.4547	-1.1651	0.0164	-1.5016	-0.6199	Training
161	O6-(4-methylsulphonylbenzyl)guanine	319.38	0.018	7.74473	6.2964	-1.4484	0.0185	-1.8687	-1.6357	Training
163	O6-(4-phenylthenyl)guanine	323.41	0.015	7.82391	6.9492	-0.8747	0.0174	-1.1279	-0.7222	Training
164	O6-(2-iodobenzyl)guanine	367.17	9.5	5.02228	6.463	1.4407	0.0179	1.8582	0.1073	Training
165	O6-(3-iodobenzyl)guanine	367.17	0.05	7.30103	6.6177	-0.6833	0.0194	-0.882	0.1073	Prediction
166	O6-(4-methylsulphinylbenzyl)guanine	303.38	0.03	7.52288	6.2463	-1.2766	0.0209	-1.6491	-1.7317	Training
167	O6-(phenanthr-3-ylmethyl)guanine	341.4	0.55	6.25964	6.4019	0.1423	0.0275	0.1844	-1.3128	Training
168	O6-(phenanthr-2-ylmethyl)guanine	341.4	0.72	6.14267	6.3892	0.2465	0.0272	0.3195	-1.3128	Training
169	O6-(phenanthro[9,10-b]thiophen-2-ylmethyl)guanine	397.49	1.1	5.95861	6.8736	0.915	0.033	1.1893	-0.7222	Training
170	O6-(3-methoxybenzyl)guanine	271.31	1.1	5.95861	6.4831	0.5245	0.0234	0.6783	-1.3646	Prediction
173	O6-(4-methoxybenzyl)guanine	271.31	0.15	6.82391	6.8289	0.005	0.0182	0.0064	-1.3646	Training
174	O6-veratrylguanine	301.34	0.23	6.63827	6.6607	0.0224	0.0491	0.0293	-1.4164	Training
175	O6-(benzo[b]thien-3-ylmethyl)guanine	297.37	2.3	5.63827	6.8766	1.2383	0.0249	1.6028	-0.7222	Training
176	O6-(4-bromothenyl)-2-deoxyguanosine O3,O5-diacetate	526.41	0.15	6.82391	7.2479	0.424	0.0548	0.5574	0.0387	Training
177	O6-(3-methylthiobenzyl)guanine	287.38	0.12	6.92082	6.1823	-0.7385	0.0304	-0.9586	-0.6199	Training
178	O6-(5-bromobenzo[b]thien-2-ylmethyl)guanine	376.26	0.16	6.79588	7.2749	0.479	0.0118	0.6159	0.1666	Prediction
179	O6-(5,6,7,8-tetrahydronaphth-2-ylmethyl)guanine	295.38	0.3	6.52288	6.3945	-0.1283	0.0225	-0.1659	-1.764	Training
181	O6-(dibenzothien-2-ylmethyl)guanine	347.43	0.075	7.12494	6.2583	-0.8667	0.0309	-1.1253	-0.7222	Prediction
182	O6-(4-bromothenyl)-9-(phthalimidopropyl)guanine	513.41	0.14	6.85387	6.9806	0.1267	0.012	0.1629	-0.4229	Training
183	O6-(4-bromothenyl)-9-(3-acetamidopropyl)guanine	425.35	0.41	6.38722	6.7239	0.3367	0.0113	0.4328	-0.2895	Training
184	O6-(4-bromothenyl)-9-(3-tert-butoxycarbonylaminopropyl)guanine	483.44	0.43	6.36653	6.7395	0.373	0.0746	0.4956	1.285	Prediction
193-1	O6-(4-bromothenyl)-9-(3-aminopropyl)guanine	383.31	0.3	6.52288	5.9176	-0.6052	0.0531	-0.795	-0.4145	Prediction
194	O6-(4-bromothenyl)-9-(2-acetamidoethyl)guanine	411.32	0.77	6.11351	6.5698	0.4563	0.013	0.587	-0.0015	Prediction
195	O6-(4-bromothenyl)-9-(2-phthalimidoethyl)guanine	499.38	0.25	6.60206	6.4468	-0.1552	0.0295	-0.2014	-0.1349	Prediction
196	O6-(4-bromothenyl)-9-(3-N-acetylglycyl)aminopropyl)guanine	482.41	0.34	6.46852	6.8485	0.38	0.0105	0.4883	-1.1261	Prediction
197	O6-(4-bromothenyl)-9-(phthalimidomethyl)guanine	485.35	1.05	5.97881	7.3212	1.3424	0.0148	1.7287	-0.1526	Training
198	O6-(5-methoxybenzo[b]thien-2-ylmethyl)guanine	327.4	0.034	7.46852	7.5977	0.1292	0.0154	0.1664	-0.774	Prediction
199-1	O6-(4-bromothenyl)-9-(2-aminoethyl)guanine	369.28	0.3	6.52288	5.7697	-0.7532	0.0492	-0.9873	-0.1265	Prediction
200	O6-(6-methoxybenzo[b]thien-2-ylmethyl)guanine	327.4	0.16	6.79588	7.4706	0.6748	0.0162	0.8696	-0.774	Training
201	O6-(4-bromothenyl)-9-{3-[N'-(2-chloroethyl)-N'-nitrosoureido]propyl}guanine	517.84	0.515	6.28819	6.8072	0.519	0.0138	0.6681	0.8727	Prediction
202	O6-(4-bromothenyl)-9-[3-N1-methyl-N1-nitrosoureido)propyl]guanine	469.37	0.315	6.50169	7.0283	0.5266	0.0126	0.6774	0.2075	Training
203	O6-(4-bromothenyl)-9-(3-trifluoroacetamidopropyl)guanine	479.32	0.58	6.23657	6.6307	0.3941	0.0104	0.5064	0.7987	Training
204	O6-(4-bromothenyl)-9-(2-acetoxyethyl)guanine	412.3	0.11	6.95861	6.895	-0.0636	0.0154	-0.082	0.5422	Training
205	O6-(4-bromothenyl)-9-(2-hydroxyethyl)guanine	370.26	0.15	6.82391	6.447	-0.3769	0.013	-0.485	0.1631	Prediction
206	O6-(4-bromothenyl)-9-[2-(N-acetylglycyl)aminoethyl]guanine	468.38	1.15	5.9393	6.7992	0.8599	0.0109	1.1051	-0.8381	Training
207	O6-(4-bromothenyl)-9-(4-hydroxybutyl)guanine	398.32	0.33	6.48149	6.7355	0.254	0.018	0.3276	-0.4129	Training
208	O6-benzyl-9-(3-phthalimidopropyl)guanine	428.49	5.5	5.25964	6.2684	1.0087	0.0273	1.3073	-1.9023	Training
209	O6-(4-bromothenyl)-9-[2-(N'-methyl-N'-nitrosoureido)ethyl]guanine	455.34	0.62	6.20761	6.4744	0.2668	0.0238	0.3452	0.4955	Training
210	O6-(4-bromothenyl)-9-{3-[N'-(2-chloroethyl)-N'-nitrosoureido]ethyl}guanine	503.81	1	6	6.3928	0.3928	0.0207	0.5074	1.1607	Training
211	O6-benzyl-9-(3-acetamidopropyl)guanine	340.43	20	4.69897	6.2747	1.5758	0.0246	2.0393	-1.7689	Training
214-1	O6-benzyl-9-(3-aminopropyl)guanine	298.39	9.8	5.00877	5.0146	0.0059	0.0673	0.0078	-1.8939	Prediction
216	O6-(4-bromothenyl)-9-(3-ethylenedioxypropyl)guanine	426.33	0.13	6.88606	7.5047	0.6186	0.022	0.7995	-0.5092	Prediction
217	O6-(4-bromothenyl)-9-(3-cyanopropyl)guanine	393.3	0.16	6.79588	7.2309	0.4351	0.0164	0.5607	0.3933	Training
218	O6-(4-bromothenyl)-9-(2-cyanoethyl)guanine	379.27	0.115	6.9393	7.6259	0.6866	0.0145	0.884	0.6813	Training
219	O6-(4-bromothenyl)-9-(4-azidobutyl)guanine	423.34	0.12	6.92082	8.4326	1.5118	0.0894	2.025	-0.6881	Training
220	O6-(4-bromothenyl)-9-(3-fluoropropyl)guanine	386.28	0.075	7.12494	6.954	-0.1709	0.0127	-0.2199	0.8151	Training
221	O6-(4-bromothenyl)-9-(3-aminoethyl)guanine	369.28	23	4.63827	5.609	0.9708	0.0586	1.2789	-0.1265	Training
222	O6-benzyl-9-(3-aminopropyl)guanine	298.39	102	3.9914	4.8904	0.899	0.0772	1.1963	-1.8939	Training
223	O6-(4-bromothenyl)-9-(3-phenoxypropyl)guanine	460.39	0.036	7.4437	6.8587	-0.585	0.0284	-0.7586	0.1813	Training
225	O6-(4-methylthenyl)guanine	261.34	0.095	7.02228	7.1001	0.0778	0.0237	0.1007	-0.0802	Prediction
227	O4-piperonyl-5,8-dideazapterin	297.34	172	3.76447	5.8717	2.1072	0.0342	2.7406	-0.5559	Training
228	O6-(4-bromothenyl)-9-(2,2,2-trifluoroethyl)guanine	408.23	0.19	6.72125	5.8914	-0.8298	0.0441	-1.0849	1.7099	Training
229	O6-(4-bromothenyl)-9-(4,4,4-trifluorobutyl)guanine	436.29	0.08	7.09691	6.1182	-0.9787	0.0291	-1.2696	1.1339	Training
230	O6-(4-bromothenyl)-9-(3-phenylpropyl)guanine	444.39	0.051	7.29243	6.9464	-0.346	0.0098	-0.4445	0.3862	Training
231	O6-(4-bromothenyl)-9-(cyanomethyl)guanine	365.24	0.042	7.37675	7.4421	0.0653	0.019	0.0843	0.4331	Training
232	O6-(4-bromothenyl)-9-propylguanine	368.29	0.156	6.80688	6.7237	-0.0832	0.0105	-0.1069	0.3751	Training
233	O6-(4-bromothenyl)-9-(3-methylthiopropyl)guanine	414.39	0.0192	7.7167	6.9329	-0.7838	0.0112	-1.0075	1.0283	Prediction
234	O6-benzyl-9-(3-phenoxypropyl)guanine	375.47	0.048	7.31876	6.3738	-0.9449	0.0215	-1.221	-1.2981	Prediction
235	O6-(4-bromothenyl)-9-butylguanine	382.32	0.09	7.04576	6.5695	-0.4762	0.0161	-0.6137	0.0871	Training
236	O6-(4-bromothenyl)-9-(4-phthalimido-2-thiabutyl)guanine	545.48	0.085	7.07058	6.6864	-0.3842	0.0217	-0.4965	0.4612	Prediction
237	O6-(4-bromothenyl)-9-(4-phthalimidobutyl)guanine	527.44	0.075	7.12494	6.357	-0.7679	0.0271	-0.9951	-0.7109	Training
238	O6-(4-bromothenyl)-9-(4-acetamidobutyl)guanine	439.38	0.5	6.30103	6.4833	0.1823	0.017	0.235	-0.5775	Prediction
239	O6-(4-bromothenyl)-9-(4-acetamido-2-thiabutyl)guanine	457.42	0.36	6.4437	6.231	-0.2127	0.0179	-0.2744	0.5946	Training
241	O6-(4-bromothenyl)-9-(4-amino-2-thiabutyl)guanine	415.38	2.78	5.55596	5.3854	-0.1706	0.0623	-0.2251	0.4696	Training
242	O6-(4-bromothenyl)-9-[3-(4-bromophenoxy)propyl]guanine	539.28	0.0195	7.70997	7.209	-0.501	0.0109	-0.6439	1.0701	Training
243	O6-(4-bromothenyl)-9-allylguanine	366.27	0.053	7.27572	7.1949	-0.0809	0.0147	-0.1041	1.3193	Training
244	O6-(4-bromothenyl)-9-(3-dimethylaminopropyl)guanine	411.37	0.16	6.79588	7.5319	0.736	0.0235	0.952	0.5532	Training
245	O6-(4-iodobenzyl)guanine	367.17	0.045	7.34679	6.4343	-0.9125	0.0204	-1.1785	0.1073	Training
246	O6-(4-bromothenyl)-9-(6-phthalimidohexyl)guanine	555.5	0.074	7.13077	6.9855	-0.1453	0.0195	-0.1875	-1.2869	Training
247	O6-(4-bromothenyl)-9-(6-acetamidohexyl)guanine	467.44	0.1045	6.98088	6.6835	-0.2974	0.0178	-0.3836	-1.1535	Prediction
248	O6-(4-bromothenyl)-9-[3-(2-naphthoxy)propyl]guanine	510.45	0.026	7.58503	7.1031	-0.4819	0.0157	-0.6208	0.1813	Training
249	O6-(4-bromothenyl)-9-[3-(1-naphthoxy)propyl]guanine	510.45	0.27	6.56864	7.0492	0.4806	0.0236	0.6217	0.1813	Training
251	O6-(4-bromothenyl)-9-[6-(4-bromophenoxy)hexyl]guanine	581.37	0.26	6.58503	7.2509	0.6658	0.015	0.8576	0.2061	Prediction
252	O6-(4-bromothenyl)-9-(2-hydroxyethyl)-8-aza-7-deazaguanine	370.26	0.023	7.63827	6.974	-0.6642	0.0124	-0.8544	0.1631	Training
253	O6-(4-bromothenyl)-9-[3-(oestra-17-ol-3-yloxy)propyl]guanine	644.75	0.044	7.35655	7.5024	0.1459	0.1018	0.1967	-0.3463	Training
254	O6-(4-bromothenyl)-9-[6-(tetrachlorophthalimido)hexyl]guanine	693.26	0.54	6.26761	6.6505	0.3829	0.0208	0.4945	1.6903	Training
256	O6-(4-bromothenyl)-9-[2-(4-bromophenoxy)ethyl]guanine	525.25	0.046	7.33724	7.2096	-0.1277	0.0188	-0.1647	1.3581	Training
257	O6-methyl-9-(3-phthalimidopropyl)guanine	352.39	400	3.39794	5.8313	2.4334	0.0328	3.1626	-1.8116	Training
258	2-amino-O6-benzyloxy-4-[3-(4-bromophenoxy)propylamino]pyrimidine	429.35	8.8	5.05552	6.5642	1.5087	0.0182	1.9461	-0.8429	Training
259	2-amino-6-benzyloxy-4-[3-(4-bromophenoxy)propylamino]-5-nitrosopyrimidine	458.35	0.015	7.82391	6.9135	-0.9104	0.0197	-1.1753	-0.8662	Prediction
260	2-amino-4-[3-(4-bromophenoxy)propylamino]-6-(4-bromothenyloxy)pyrimidine	514.27	3	5.52288	7.1431	1.6202	0.0131	2.0846	0.6365	Training
261	2-amino-4-[3-(4-bromophenoxy)propylamino]-6-(4-bromothenyloxy)5-nitrosopyrimidine	543.27	0.0124	7.90658	7.3245	-0.5821	0.0213	-0.752	0.6132	Training
262	O6-(4-bromothenyl)-9-(3-cyclohexyloxypropyl)guanine	466.45	0.0084	8.07572	6.9816	-1.0941	0.023	-1.4149	-1.3091	Training
263	O6-(4-bromothenyl)-9-cinnamylguanine	442.37	0.13	6.88606	7.0136	0.1276	0.0101	0.1639	1.0796	Training
264	O6-(4-bromothenyl)-9-(4-phenoxybutyl)guanine	474.42	0.16	6.79588	7.0156	0.2198	0.0234	0.2842	-0.1067	Prediction
265	O6-(4-bromothenyl)-9-(3-glycylaminopropyl) guanine	440.37	0.052	7.284	6.325	-0.959	0.0425	-1.2527	-1.2511	Prediction
266	O6-(4-bromothenyl)-9-(3-methoxylpropyl) guanine	398.32	0.04	7.39794	7.2387	-0.1592	0.0125	-0.2048	0.2836	Training
267	O6-(4-bromothenyl)-9-[3-(4-iodophenoxy)propyl] guanine	586.28	0.16	6.79588	7.2869	0.4911	0.0109	0.6311	1.6014	Training
270	O6-(4-bromothenyl)-9-[6-(trifluoroacetamido)hexyl]guanine	521.41	0.13	6.88606	6.399	-0.4871	0.0112	-0.6261	-0.0653	Training
271	O6-(4-bromothenyl)-9-[6-(N'-methyl-N'-nitrosoureido)hexyl]guanine	511.46	0.1825	6.73874	6.6321	-0.1066	0.0129	-0.1372	-0.6565	Training
272	O6-(4-strylbenzyl)guanine	343.42	0.091	7.04096	6.6927	-0.3483	0.0213	-0.45	-0.845	Training
273	O6-(4-bromothenyl)-9-(3-orpholinopropyl)guanine	453.41	0.13	6.88606	7.2808	0.3947	0.0173	0.509	0.2409	Training
274	O6-(4-iodothenyl)guanine	373.2	0.017	7.76955	7.2308	-0.5387	0.0128	-0.693	0.6979	Training
275	O6 - (4-bromothenyl)-9-methylguanine	340.23	0.05	7.30103	7.2477	-0.0533	0.0139	-0.0686	0.7025	Prediction
276	O6-(4-bromothenyl)-9-[3-(3-carbamoylphenoxy)propyl] guanine	503.42	0.1	7	5.7411	-1.2589	0.0746	-1.6728	-0.4535	Training
278	O6-(4-bromothenyl)-9-(3-phenoxypropyl)-8-aza-7-deazaguanine	460.39	0.06	7.22185	7.1558	-0.0661	0.0121	-0.085	0.1813	Training
279-2	3-(3-bromopropoxy)benzamide	258.13	7	5.1549	3.6323	-1.5226	0.0831	-2.0325	-0.1649	Training
280	O6-(4-bromothenyl)-9-(3-chloropropyl) guanine	402.73	0.08	7.09691	6.8445	-0.2524	0.0117	-0.3245	1.0797	Training
281	O6-(4-bromothenyl)-9-(2-morpholinoethyl) guanine	439.38	0.5	6.30103	6.7517	0.4507	0.0129	0.5798	0.5289	Training
282	O6-benzyl-9-(3-phenoxypropyl)-8-aza-7-deazaguanine	375.47	0.25	6.60206	6.3857	-0.2164	0.0226	-0.2797	-1.2981	Training
283	O6-piperonyl-9-(3-phenoxypropyl)-8-aza-7-deazaguanine	419.48	0.14	6.85387	7.0583	0.2045	0.0691	0.2709	-1.6008	Training
284	O6-thenyl-9-(3-phenoxypropyl)-8-aza-7-deazaguanine	381.5	0.04	7.39794	7.1749	-0.2231	0.0156	-0.2874	-0.7075	Training
286	O6-(4-bromothenyl)-9-{6-[N'-(2-chloroethyl)-N'-nitrosoureido]hexyl}guanine	559.93	0.545	6.2636	6.5055	0.2418	0.0131	0.3112	0.0087	Training
287	O6-(4-bromothenyl)-9-(benzyloxycarbonyl)guanine	460.34	0.007	8.1549	7.5935	-0.5614	0.0147	-0.7229	0.5146	Training
288	O6-(4-bromothenyl)-9-(10-phthalimidodecyl)guanine	611.62	0.5065	6.29542	6.706	0.4105	0.0159	0.529	-2.4389	Training
289	O6-(4-bromothenyl)-9-(10-acetamidodecyl)guanine	523.56	0.0875	7.05799	6.4302	-0.6278	0.0135	-0.8079	-2.3055	Training
291	O6-(4-bromothenyl)-9-(8-phthalimido-3,6-dioxaoctyl) guanine	587.5	0.35	6.45593	6.9183	0.4623	0.0147	0.5953	-0.3967	Training
292	O6-(4-bromothenyl)-9-(piperonyloxycarbonyl) guanine	504.35	0.007	8.1549	8.2851	0.1302	0.0637	0.1719	0.2119	Training
294	O6-(4-bromothenyl)-9-(2-aziridinoethyl) guanine	395.32	0.4	6.39794	6.3369	-0.061	0.0443	-0.0798	0.6598	Training
295	O6-(4-bromothenyl)-9-[3-(4-pyridyl)propyl] guanine	445.38	0.15	6.82391	6.9582	0.1343	0.0145	0.1729	0.3862	Training
296	O6-(4-bromothenyl)-9-(morpholinecarbonyl) guanine	439.33	0.2	6.69897	7.2241	0.5251	0.0178	0.6772	-0.1484	Training
297	O6-(4-bromothenyl)-9-(dimethylcarbamoyl) guanine	397.29	0.05	7.30103	7.571	0.2699	0.0253	0.3495	0.1639	Training
298	O6-(4-bromothenyl)-9-(hexylcarbamoyl) guanine	453.41	0.013	7.88606	6.6815	-1.2046	0.0383	-1.57	-1.1298	Training
299	3-(4-bromophenoxy)propyl bromide	293.99	95	4.02228	3.4137	-0.6086	0.1333	-0.8356	1.3587	Prediction
300	4-phenoxybutyl bromide	229.13	46	4.33724	3.3005	-1.0368	0.1389	-1.4281	0.1819	Training
301	3-phenoxypropyl bromide	215.1	60	4.22185	3.3921	-0.8297	0.1469	-1.1482	0.4699	Prediction
302	2-(4-bromophenoxy)ethyl bromide	279.96	54	4.26761	3.7708	-0.4968	0.133	-0.682	1.6467	Prediction
303	6-phthalimidohexyl bromide	310.21	27	4.56864	3.3469	-1.2218	0.1393	-1.6833	-0.9983	Training
304	O6-(4-bromothenyl)-9-[10-(N'-methyl-N'-nitrosoureido)decyl]guanine	567.58	0.345	6.46218	6.5545	0.0924	0.0212	0.1193	-1.8085	Training
305	O6-(4-bromothenyl)-9-(6-morpholinohexyl)guanine	495.5	0.225	6.64782	6.9139	0.2661	0.0155	0.3428	-0.6231	Prediction
306	6-(4-bromothenyloxy)-5-(4-chlorophenylazo)-2,4-diaminopyrimidine	439.75	0.4	6.39794	7.9063	1.5084	0.0696	1.9988	0.5814	Training
307	6-benzyloxy-5-(4-chlorophenylazo)-2,4-diaminopyrimidine	354.83	0.5	6.30103	6.6034	0.3024	0.0917	0.4056	-0.898	Training
309	O6-(4-bromothenyl)-9-[6-(3-carbamoylphenoxy)hexyl]guanine	545.51	0.067	7.17393	5.6131	-1.5608	0.0887	-2.0899	-1.3175	Training
310	2-Amino-6-(4-bromothenyl)aminopurine	325.22	12.5	4.90309	6.29	1.3869	0.0424	1.8115	-0.0997	Training
311	3-(6-chlorohexyloxy)benzamide	255.77	200	3.69897	4.0595	0.3605	0.0851	0.4817	-1.1734	Prediction
312	O6-(4-bromothenyl)-9-(8-acetamido-3,6-dioxaoctyl)guanine	499.44	1.15	5.9393	6.7537	0.8144	0.0146	1.0486	-0.2633	Training
313	O6-(4-bromothenyl)-9-[3-(2-naphthoxy)propyl]-8-aza-7-deazaguanine	510.45	0.13	6.88606	7.4002	0.5142	0.0174	0.663	0.1813	Prediction
314	O6-benzyl-9-[3-(2-naphthoxy)propyl]-8-aza-7-deazaguanine	425.53	0.135	6.86967	6.7332	-0.1365	0.0348	-0.1776	-1.2981	Training
315	O6-benzyl-9-(methoxycarbonyl)-8-aza-7-deazaguanine	299.32	0.042	7.37675	7.1572	-0.2195	0.0325	-0.2853	-0.8741	Training
316	O6-(4-bromothenyl)-9-(methoxycarbonyl)-8-aza-7-deazaguanine	384.24	0.013	7.88606	7.9296	0.0435	0.0265	0.0564	0.6053	Training
317	6-bromohexan(3-carbamoylanilide)	299.24	70	4.1549	4.6057	0.4508	0.0585	0.5939	-0.5904	Prediction
318	O6-(4-bromothenyl)-9-(cyclohexylcarbamoyl)guanine	451.39	0.095	7.02228	6.8308	-0.1914	0.0361	-0.2492	-1.5311	Training
319	6-bromohexan-[4-(2-hydroxyethyl)anilide]	314.25	70	4.1549	4.3647	0.2098	0.109	0.2841	-0.9717	Training
320	O6-(4-bromothenyl)-7-[(2-phenylthio)ethyl]guanine	462.43	2.75	5.56067	7.1333	1.5726	0.0167	2.0271	1.214	Training
321	O6-(4-bromothenyl)-9-[(3-methylsulphonyl)propyl]guanine	446.39	0.5	6.30103	6.9945	0.6934	0.009	0.8904	0.0125	Training
323	O6-(4-bromothenyl)-9-[(4-picolyloxy)carbonyl]guanine	461.33	0.01	8	7.3881	-0.6119	0.0123	-0.787	0.5146	Prediction
325	O6-(4-bromothenyl)-9-(propylcarbamoyl)guanine	411.32	0.05	7.30103	7.2753	-0.0257	0.0164	-0.0331	-0.2658	Training
326	O6-(4-bromothenyl)-9-[(4-picolyl)carbamoyl]guanine	460.35	0.01	8	7.3885	-0.6115	0.0103	-0.7857	-0.0291	Training
327	O6-(4-bromothenyl)-9-[N-(4-phthalimidobutyl)-N-(3-phthalimidopropyl)carbamoyl]guanine	757.68	0.038	7.42022	7.0626	-0.3576	0.0185	-0.4614	-2.3749	Training
328	O6-(4-bromothenyl)-9-(phenoxycarbonyl)guanine	446.31	0.005	8.30103	7.376	-0.925	0.0115	-1.1892	0.503	Prediction
329	2-amino-4-benzyloxy-6-(N'-hexylureido)-5-nitrosopyrimidine	372.48	0.006	8.22185	6.8548	-1.3671	0.026	-1.7706	-2.6325	Training
330	O6-(4-bromothenyl)-9-(pipenonyloxycarbonyl)-8-aza-7-deazaguanine	504.35	0.057	7.24413	8.2756	1.0315	0.0591	1.3592	0.2119	Training
331	O6-(4-bromothenyl)-9-(benzyloxycarbonyl)-8-aza-7-deazaguanine	460.34	0.006	8.22185	7.7332	-0.4886	0.0161	-0.6297	0.5146	Training
332	O6- (4-bromothenyl)-9-(phenoxythionocarbonyl)guanine	462.31	0.009	8.04576	7.3339	-0.7119	0.0408	-0.9291	1.0599	Training
333	4-bromobutyranilide	242.13	190	3.72125	4.2412	0.52	0.0446	0.68	0.0124	Training
334	O6- (4-bromothenyl)-9-(cyclohexyloxycarbonyl)guanine	452.37	0.004	8.39794	7.3158	-1.0822	0.0102	-1.3904	-0.9874	Prediction
335	3-bromobutyl(3-carbamoylanilide)	271.18	230	3.63827	3.9127	0.2744	0.0674	0.3632	-0.4419	Training
336	acryl(3-carbamoylanilide)	190.22	750	3.12494	3.0752	-0.0498	0.176	-0.0701	-0.6688	Prediction
337	O6-(4-bromothenyl)-9-[(picolyloxy)carbonyl]-8-aza-7-deazaguanine	461.33	0.004	8.39794	7.7804	-0.6176	0.0323	-0.8024	0.9425	Training
339	3-choloropropion(3-acetyllanilide)	225.69	40	4.39794	3.9502	-0.4477	0.0584	-0.5897	-0.098	Training
340	3-bromopropion(3-acetyllanilide)	270.14	30	4.52288	4.255	-0.2679	0.0628	-0.3537	0.0465	Training
341	O6-(4-bromothenyl)-9-(6-morpholinohexycarbonyl)guanine	523.51	0.006	8.22185	6.7826	-1.4393	0.0121	-1.851	-1.2479	Prediction
342	O6-(4-bromothenyl)-9-(2-adamantyloxycarbonyl)guanine	504.45	0.008	8.09691	8.2158	0.1189	0.0454	0.1556	-0.4598	Prediction
343	3-Chloropropion(3-carbamoylanilide)	226.68	160	3.79588	3.5285	-0.2674	0.0729	-0.3549	-0.4789	Prediction
344	4-chlorobutyryl(3-carbamoylanilide)	240.71	150	3.82391	3.8396	0.0157	0.0679	0.0208	-0.7669	Training
345	3-bromopropion(4-carbamoylanilide)	271.13	160	3.79588	3.8457	0.0498	0.0722	0.0661	-0.3344	Training
346	4-bromobutyryl(3-acetylanilide)	284.17	40	4.39794	4.1769	-0.2211	0.0528	-0.2904	-0.2415	Training
347	3-bromopropion(2-carbamoylanilide)	271.13	240	3.61979	3.6108	-0.009	0.068	-0.0119	-0.3344	Training
348	O6-(4-bromothenyl)-9-{N-[4-(tert-butoxycarbonylamino)butryl]-N-[3-(tert-butoxycarbonylamino)propyl]carbamoyl}guanine	697.74	0.46	6.33724	6.4974	0.1601	0.3223	0.2486	1.0409	Training
349	O6-(4-bromothenyl)-9-[N-methyl-N-(2-phthalimidoethyl)carbamoyl]guanine	556.44	0.23	6.63827	6.704	0.0658	0.0152	0.0847	-0.6735	Training
350	Ethylenesulphonanilide	183.25	200	3.69897	3.3936	-0.3054	0.1216	-0.4165	-0.75	Training
351	O6-(4-bromothenyl)-7-(dihydrotestosteronylcarbonyl)guanine	642.68	0.003	8.52288	7.0604	-1.4624	0.045	-1.9128	0.0494	Training
352-1	4-(4-Bromohetylyloxy)benzamide	314.25	60	4.22185	4.3158	0.094	0.0824	0.1254	-1.0396	Prediction
353-1	O6-(4-bromothenyl)-9-(4-methylpiperazin-1-carbonyl)guanine	452.38	0.05	7.30103	6.8544	-0.4466	0.0112	-0.5741	0.1212	Prediction
354	3-(4-bromobutyryloxy)acetophenone	285.15	20	4.69897	3.0922	-1.6068	0.1527	-2.2311	0.3022	Training
355	O6-benzyl-9-methyl-8-aza-7-deazahypoxanthine	240.29	130	3.88606	4.7162	0.8302	0.1786	1.1708	-0.027	Training
356	O6-piperonyl-9-methyl-8-aza-7-deazalypoxanthine	284.3	50	4.30103	5.2791	0.9781	0.1734	1.3751	-0.3297	Training
357	3-(4-chlorobutyryloxy)benzaldehyde	226.67	6000	2.22185	3.2291	1.0072	0.1621	1.4065	0.2192	Training
358	O6(4-bromothenyl)-N-(cyclohexylcarbamoyl)-8-aza-7deazaguanine	451.39	1.5	5.82391	6.9521	1.1282	0.0657	1.4919	-1.2016	Training
359	O6(4-bromothenyl)-9-(morpholinocarbonyl)-8-aza-7-deazaguanine	439.33	0.03	7.52288	7.4735	-0.0494	0.0217	-0.0638	-0.1484	Training
360	O6-(4-bromothenyl)-9-(diphenylcarbonoyl)guanine	524.43	0.07	7.1549	7.5496	0.3947	0.0377	0.5142	0.7752	Training
361	O6(4-bromothenyl)-9-(pyrolidinocarbonyl)guanine	423.33	0.5	6.30103	7.1751	0.8741	0.0116	1.1238	-0.5935	Prediction
362	4-(3-bromopropoxy)benzamide	258.13	120	3.92082	4.1675	0.2467	0.0824	0.3292	-0.1649	Prediction
363	N-[3-(3-bromopropoxy)penyl]urea	273.15	34	4.46852	4.5888	0.1202	0.0406	0.1569	-0.1578	Training
364	O6-(4-bromothenyl)-9-(4-benzylpiperazin-1-carbonyl)guanine	528.48	0.28	6.55284	6.6227	0.0699	0.0171	0.0901	0.0305	Prediction
365-3	O6-(4-bromothenyl)-9[(3-monopholinopropyl)carbamoyl]guanine hydrochloride	496.44	0.0225	7.64782	7.5421	-0.1057	0.0162	-0.1362	-0.4	Training
366	O6-(4-methylthiobenzyl)-9-hexylcarbamoyl-guanine	414.59	0.6	6.22185	6.2098	-0.0121	0.0252	-0.0156	-1.9163	Training
367	O6-piperonyl-9-hexylcarbamoyl-guanine	412.5	0.84	6.07572	6.8914	0.8157	0.037	1.0624	-2.9119	Training
368-1	O6-(4bromothenyl)-9-(1-methyl-4-piperidyloxycarbonyl)guanine	467.39	0.004	8.39794	7.5082	-0.8897	0.0163	-1.1467	0.0153	Training
369	O6-piperonyl-9-phenoxycarbonyl-guanine	405.4	0.03	7.52288	6.8259	-0.6969	0.0907	-0.9342	-1.2791	Prediction
370	N-[2-amino-4-(4-bromothenyloxy)-5-nitrosopyrimidin-6-yl]-N'-hexylurea	457.4	0.023	7.63827	7.4046	-0.2337	0.0251	-0.3025	-1.1531	Prediction
371	N-[2-amino-4-(4-bromothenyloxy)pyrimidin-6-yl]-N'-hexylurea	428.4	0.3	6.52288	7.1128	0.5899	0.0185	0.7611	-1.1298	Training
372	N-(2-amino-4-benzyloxypyrimidin-6-yl]-N'-hexylurea	343.48	6	5.22185	6.3982	1.1763	0.0226	1.5209	-2.6092	Prediction
373	O6-piperonyl-9-(propoxycarbonyl)guanine	371.39	0.02	7.69897	7.3723	-0.3267	0.0755	-0.4343	-1.5042	Training
374-1	O6-(4-bromothenyl)-9[(1-methyl-4-piperidylcarbamoyl]guanine	466.41	0.005	8.30103	7.5483	-0.7527	0.0143	-0.9691	-0.5284	Training
375	O6-(4bromothenyl)-9-(3-ethoxypropoxycarbonyl)guanine	456.36	0.0043	8.36653	7.5445	-0.8221	0.025	-1.0642	0.4368	Training
376	O6-(4bromothenyl)-9-[N-(3-ethoxypropyl)carbamoyl]guanine	455.38	0.03	7.52288	7.2867	-0.2361	0.0157	-0.3042	-0.1069	Training
377	O6-(4bromothenyl)-9-(oestradiol-17-oxycarbonyl)guanine	624.61	0.017	7.76955	8.0734	0.3038	0.0788	0.4046	0.4934	Training
378	O6-(4-fluorobenzyl)-8-oxoguanine	275.27	0.083	7.08092	6.7719	-0.309	0.0164	-0.3983	-1.0404	Training
379	5-(4-bromothenylamino)-2,4-diaminopyrimidine-6-one	316.21	4.2	5.37675	5.4622	0.0854	0.0834	0.1141	-0.242	Training
380	O6-(4-bromothenyl)-9-(4-piperidinopiperidonocarbonyl)guanine	520.51	0.27	6.56864	7.2415	0.6728	0.0179	0.8678	-1.4715	Training
381	O6-(4-bromothenyl)-9-(4-nitrobenzyloxycarbonyl)guanine	505.34	0.0047	8.3279	7.6669	-0.661	0.0139	-0.8509	1.1747	Training
382	O6-(4bromothenyl)-9-(6-dimethylaminohexyloxycarbonyl)guanine	497.47	0.0046	8.33724	7.548	-0.7893	0.02	-1.0191	-0.408	Training
383	O6-(4bromothenyl)-9-(3-piperidinopropoxycarbonyl)guanine	495.45	0.0047	8.3279	7.6785	-0.6494	0.0157	-0.8367	-0.5894	Prediction
384	O6-(4bromothenyl)-9-(N-methoxycarbamoyl)guanine	399.26	0.026	7.58503	7.2022	-0.3829	0.0198	-0.4943	-0.0925	Training
385	O6-(4-fluorobenzyl)-9-(hexyloxycarbonyl)-8-oxoguanine	403.46	0.085	7.07058	6.5896	-0.481	0.0222	-0.6217	-1.7022	Training
386	O6-(4bromothenyl)-9-(propoxycarbonyl)guanine	412.3	0.0036	8.4437	7.4663	-0.9774	0.0216	-1.2631	0.2779	Training
387	O6-(4bromothenyl)-N7-carboxy(oestradiol-17-oxy)guanine	624.61	0.0065	8.18709	8.0133	-0.1738	0.0774	-0.2312	0.4934	Training
389	O6-(4-fluorobenzyl)-8-oxoguanine	275.27	0.14	6.85387	6.4592	-0.3947	0.0331	-0.5131	-1.0404	Prediction
390	O6-(4-bromothenyl)-9-dimethylcarbamoyl-8-aza-7deazaguanine	397.29	0.0045	8.34679	7.5602	-0.7866	0.0213	-1.0163	0.1639	Prediction
391	O6-(4-bromothenyl)-9-diphenylcarbamoyl-8-aza-7deazaguanine	521.43	0.0047	8.3279	7.3732	-0.9547	0.0166	-1.2306	-0.0407	Training
393	O6-(4-bromothenyl)-9-(hexylcarbamoyl)-8-aza-7deazaguanine	453.41	0.024	7.61979	6.8766	-0.7432	0.0538	-0.9765	-1.1298	Training
394	O6-(4-bromothenyl)-9-(3-ethoxypropylcarbamoyl)-8-aza-7deazaguanine	455.38	0.0041	8.38722	7.4752	-0.912	0.0229	-1.1793	-0.1069	Training
395	O6-(4-bromothenyl)-9-(N-cyclohexylcarbamoyl)-8-aza-7deazaguanine	451.39	0.0586	7.2321	7.2158	-0.0163	0.0615	-0.0215	-1.5311	Training
396	O6-(4-bromothenyl)-9-[N-(3-ethoxypropyl)carbamoyl]-8-aza-7deazaguanine	455.38	0.0336	7.47366	7.6139	0.1403	0.0283	0.1819	-0.1069	Training
397	O6-(4-bromothenyl)-9-[N-(3-morpholinopropyl)carbamoyl]-8-aza-7deazaguanine	496.44	0.0218	7.66154	7.6799	0.0184	0.0182	0.0237	-0.4	Prediction
398	O6-(4-bromothenyl)-9-morpholinocarbonyl]-8-aza-7deazaguanine	439.33	0.096	7.01773	7.5736	0.5559	0.0222	0.7185	-0.1484	Training
399	O6-(4-bromothenyl)-9-(4-benzylpiperazin-1-carbonyl)-8-aza-7deazaguanine	528.48	0.0255	7.59346	7.1864	-0.407	0.0152	-0.5243	0.0305	Prediction
400	O6-(4-bromothenyl)-9-(4-piperidinopiperidinocarbonyl)-8-aza-7deazaguanine	520.51	0.0448	7.34872	7.4298	0.0811	0.021	0.1047	-1.4715	Training
401	O6-(4-bromothenyl)-9-(pyrididinocarbonoyl)-8-aza-7deazaguanine	423.33	0.0025	8.60206	7.5213	-1.0808	0.0216	-1.3967	-0.5935	Training
402	O6-(4-bromothenyl)-8-(phenoxycarbonyl)-8-aza-7deazaguanine	446.31	0.00182	8.73993	7.6609	-1.079	0.0256	-1.3972	0.3339	Training
403	O6-(4-bromothenyl)allohypoxanthine	311.18	0.14	6.85387	6.943	0.0892	0.0717	0.1183	0.9165	Training
404	O6-benzylallohypoxanthine	226.26	2.93	5.53313	6.1379	0.6048	0.0725	0.8027	-0.5629	Prediction
405	O6-(4-methylsulphonylbenzyl)-9-(piperonyloxycarbonyl)guanine	497.53	0.172	6.76447	7.3658	0.6014	0.0639	0.7945	-1.5904	Training
406	O6-(4-bromothenyl)-N2- (hexylcarbamoyl)-8-aza-7deazaguanine	453.41	0.24	6.61979	6.1226	-0.4972	0.091	-0.6666	-0.8003	Training
407	O6-(4-bromothenyl)-9-(1-methyl-4-piperidyloxycarbonyl)-8-aza-7deazaguanine	467.39	0.003	8.52288	8.1045	-0.4183	0.0347	-0.5443	0.0153	Prediction
408	O6-(4-bromothenyl)-9-(4-methylpiperazinyl-1-carbonyl)-8-aza-7deazaguanine	452.38	0.022	7.65758	7.5417	-0.1159	0.0233	-0.1499	0.1212	Training
409	O6-(4-bromothenyl)-9-(phenoxycarbonyl)-8-aza-7deazaguanine	446.31	0.004	8.39794	7.8671	-0.5308	0.022	-0.686	0.503	Training
410	O6-(4-bromothenyl)-9-(propoxycarbonyl)-8-aza-7deazaguanine	412.3	0.006	8.22185	7.7709	-0.4509	0.0337	-0.5863	0.2779	Training
411	O6-(4-bromothenyl)-8-(propoxycarbonyl)-8-aza-7deazaguanine	412.3	0.003	8.52288	7.7206	-0.8023	0.0239	-1.038	0.2779	Training
412	O6-(4-bromothenyl)-9-(N-phenylcarbamoyl)-8-aza-7deazaguanine	445.33	0.006	8.22185	7.8696	-0.3522	0.0264	-0.4563	-0.0407	Training
413	O6-(4-bromothenyl)-9-{10-[N'-(2-chloroethyl)-N'-nitrosoureido]decyl}-guanine	616.05	0.419	6.37779	5.9922	-0.3856	0.0235	-0.4988	-1.1433	Training
414	O6-(4'-Bromothenyl)-9-(N,N-dimethylaminocarbamoyl)-8-aza-7-deazaguanine alloPaTrin-2-dimethylhydrazine	412.31	0.058	7.23657	7.6259	0.3893	0.016	0.5016	0.1771	Prediction
415	O6-(4-bromothenyl)-9-(4-nitrobenzyloxymethyl)guanine	491.36	0.176	6.75449	7.2853	0.5309	0.0126	0.6829	1.1233	Training
416	O6-(4-bromothenyl)-9-(N-methoxycarbamoyl)-8-aza-7deazaguanine	399.26	0.0355	7.44977	7.8709	0.4211	0.0302	0.5465	-0.0925	Training
417-1	O6-(4-bromothenyl)-9-[N-(4-methyl-1-piperazinyl)carbamoyl]-8-aza-7deazaguanine	467.4	0.0584	7.23359	7.8576	0.624	0.0271	0.8087	0.1344	Training
418	O6-(4-bromothenyl)-9-(6-aminohexyl)guanine	425.4	0.93	6.03152	5.3501	-0.6814	0.0676	-0.902	-1.2785	Prediction
419	O6-(4-bromothenyl)-9-benzylguanine	416.33	1.65	5.78252	6.642	0.8595	0.0362	1.1191	0.6118	Prediction
420	O6-(4-bromothenyl)-9-[(6-nitropiperonyl)oxycarbonyl]-guanine	549.35	0.004	8.39794	7.7614	-0.6365	0.0848	-0.8505	0.872	Prediction
421	O6-(4-bromothenyl)-9-[(6-nitroveratryl)oxycarbonyl]-guanine	565.4	0.003	8.52288	7.9652	-0.5577	0.0619	-0.736	1.0711	Training
424	O6-(4-bromothenyl)-9-(anisyloxymethyl)guanine	462.36	0.12	6.92082	7.2424	0.3216	0.0591	0.4238	0.3998	Training
425	O6-(4-bromothenyl)-9-(piperonyloxymethyl)guanine	490.37	0.44	6.35655	7.3836	1.0271	0.0636	1.3566	0.1605	Training
426	O6-(4-bromothenyl)-9-[(+)-menthyloxycarbonyl]guanine	508.49	0.017	7.76955	6.9915	-0.778	0.0776	-1.0355	1.6196	Prediction
427	O6-(4-bromothenyl)-9-[10-(4,5-methylenedioxy-2-nitrobenzyloxycarbonylamine)decyl]-guanine	704.67	0.18	6.74473	7.5475	0.8027	0.0665	1.062	-1.3956	Prediction
428	O6-(4'-Bromothenyl)-9-(+)menthyloxymethylguanine	494.51	2.3	5.63827	6.8595	1.2213	0.0999	1.6454	1.5682	Prediction
429	O6-(4'-Bromothenyl)-9-(-)menthyloxymethylguanine	494.51	1.7	5.76955	6.8236	1.054	0.0985	1.419	1.5682	Training
430	O6-(4-bromothenyl)-7-(3-aminopropyl)guanine	383.31	4	5.39794	5.8286	0.4306	0.0519	0.5653	-0.4145	Training
431	O6-(4-bromothenyl)-7-(ethoxymethyl)guanine	384.29	2.16	5.66555	6.3438	0.6782	0.035	0.8825	0.8043	Training
432	O6-(4-bromothenyl)-9-(10-carboxydecyl)guanine	510.51	0.056	7.25181	7.1451	-0.1067	0.016	-0.1375	-1.8972	Training
434	2-Amino-4-benzyloxy-6-morpholino-5-nitropyrimidine	331.37	1	6	5.9104	-0.0896	0.0196	-0.1157	-0.3268	Training
435	2-Amino-4-(4-bromothenyloxy)-6-[N-(4-(4-aminophenylamino)anilino)]-5-nitropyrimidine	528.43	4.7	5.3279	5.8534	0.5255	0.0583	0.6922	-0.3436	Prediction
437	2-Amino-4-(4-bromothenyloxy)-6-[N-(4-(4-aminophenoxy)anilino)]-5-nitropyrimidine	529.41	13	4.88606	5.4979	0.6118	0.0837	0.8169	-0.0773	Training
438	O6-(4-bromothenyl)-9-(phenoxycarbonyl)-8-aza-7-deazapurine	431.29	6.6	5.18046	5.8676	0.6871	0.1659	0.9616	1.2529	Training
	Yellow indicates the structural outliers (h > h*) or response outliers

## Sheet: Table S4-True external set
Table S4. The detailed results of the true external dataset from the full model
No.	Inactivator Name	MW	Predicted pIC50	HAT i/i (h*=0.0811)	AlogP
7	O6-(2-picolyl)guanine.1/2H2O	242.27	6.5647	0.0139	-1.3128
11	DL-O6-(a-methylbenzyl)guanine	255	6.2825	0.0233	-1.3235
12	DL-O6-(a-methylthenyl)guanine	261	6.9494	0.016	-0.7329
14	DL-O6-[1-(3-thienyl)ethyl]guanine	261.34	6.2427	0.0229	-0.7329
19	S6-furfuryl-6-thioguanine.1H2O	265	6.5627	0.0412	-0.7222
20	S6-piperonyl-6-thioguanine	301.36	6.4183	0.0232	-0.8708
22	S6-(cyanomethyl-6-thioguanine	206	6.3829	0.059	-0.7468
23	O6-(2-methoxybenzyl)guanine.1/2H2O	271.31	7.161	0.0138	-1.3646
25	S6-acetonyl-6-thioguanine	223	6.0381	0.0584	-1.0354
26	O6-(5-carboxyfurfuryl)guanine	275.25	7.2135	0.0282	-1.7067
27	S6-phenacyl-6-thioguanine	285	6.3852	0.0396	-1.0453
28	S6-methyl-6-thioguanine	181	5.7949	0.0351	-0.4774
29	O4-benzyl-1-methyluracil	216	4.3225	0.1268	-0.7415
30	O4-benzyl-1-methyl-3-deazauracil	215	4.0966	0.1382	-0.8139
31	O4-benzyl-3-formyl-1-methyl-3-deazauracil	243	4.5819	0.1655	-1.0952
32	O4-piperonyl-1-methyluracil	260	4.8254	0.127	-1.0442
35	O4-benzyl-1-methylthymine	230	4.5166	0.1428	-0.1884
36	O4-allyl-1-methylthymine	180	5.1005	0.2664	0.5191
38	O6-1-(napthylmethyl)guanine.1/2MeOH	291.34	6.8231	0.016	-1.3128
68	O6-(5-methylthiothenyl)guanine	293.41	7.2125	0.0099	-0.0293
123	O4-benzyl-5-deazalumazine	253	5.9851	0.0555	-0.6028
133	O6-thenyl-3-methylxanthine	262	6.1385	0.0346	-0.4114
135	O6-benzyl-3-methylxanthine	256	5.629	0.0361	-1.002
136	O6(4-bromothenyl)-3-methylxanthine	340	6.2863	0.0343	0.4774
137	O4-thenyl-5-deazalumazine	259.31	6.5851	0.0509	-0.0122
143	O4-piperonyl-5-deazalumazine	297	6.5163	0.0647	-0.9055
149	O6-(2-methylthioethyl)guanine	225	6.8865	0.0224	-0.6083
150	O6-(2-hydroxyethyl)guanine	195	5.8011	0.0429	-1.7615
152	DL-O6-[a-trifluoromethyl)thenyl]guanine.1/2H2O	324	6.9966	0.0328	0.3139
153	O4-(4-bromothenyl)-5-deazalumazine	338	6.7183	0.0513	0.8766
162	O6-benzyl-9-(b-D-arabinofuranosyl)-guanine	373	6.3443	0.024	-2.4216
171	O6-(4,5,6,7-tetrahydrobenzo[b]thien-2-ylmethyl)guanine	301.41	7.397	0.0076	-0.9802
172	O6-benzyl-3-deazaguanine	240	5.6044	0.0133	-1.3128
180	O6-4-bromothenyl-3-deazaguanine	325.21	6.2085	0.0107	0.1666
185	O6-(4-chlorobenzyl)-3-methylguanine	290	5.6886	0.0205	0.5237
186	O6-(4-bromothenyl)-3-methylguanine	340	6.3687	0.0125	1.2588
187	O6-thenyl-3-methylguanine	263	6.2383	0.0119	0.37
188	O4-benzyl-5-deazapterin	252	6.5383	0.0139	-0.8924
189	O4-thenyl-5-deazapterin	258	7.1401	0.0079	-0.3018
190	O4-(4-bromothenyl)-5-deazapterin	337	7.268	0.0083	0.587
191	O4-piperonyl-5-deazapterin	296	7.1187	0.0238	-1.1951
192	O6-(4-bromothenyl)-9-(3-azidopropyl)guanine	409.31	9.2613	0.0635	-0.4001
212	O6-(5-tert-butylfurfuryl)guanine	287	5.9263	0.0754	0.0893
213	O4-benzyl-5,8-dideazapterin	251	6.0128	0.0226	-0.8924
215	O6-(4-bromothenyl)-9-(2-azidoethyl)guanine	395.28	9.2005	0.0859	-0.1121
224	O6-(3-methylthenyl)guanine	261.34	6.8468	0.0173	-0.0802
226	O4-(4-bromothenyl)-5,8-dideazapterin	336.23	6.7093	0.0152	0.587
240	O4-thenyl-5,8-dideazapterin	257	6.5947	0.0138	-0.3018
250	O6-methyl-9-[3-(4-bromophenoxy)propyl]guanine	378	6.5822	0.0138	-0.3186
255	O6-methyl-9-(6-phthalimidohexyl)guanine	394	5.6732	0.0165	-2.6756
268	O6-(1,4-benzodioxan-6-yl)methyl guanine	323	7.2255	0.0281	-1.5978
269	O6-(Cyclohexylmethyl) guanine	247	6.6928	0.0157	-1.9717
277	N6-benzyl-2,6-diaminopurine	240.3	6.2445	0.041	-1.5791
285	1-[3-(N'-methyl-N'-nitrosoureido)propyl]imidazole	211	4.6871	0.049	-0.3795
290	3-(3-azidopropoxy)benzamide	220	5.632	0.0233	-1.7892
293-1	3-(3-aminopropoxy)benzamide	194	1.802	0.1658	-1.8036
308	10-phthalimidodecyl bromide	366	3.3484	0.1004	-2.1503
322	3-bromopropylphthalimide	268	4.6766	0.0424	-0.0835
324	3-(allyloxy)benzamide	177	3.5168	0.0722	-0.0698
338	acryl(4-carbamoylanilide)	190	3.2994	0.1127	-0.6688
388	2-amino-4-octyloxycarbonylamino-5-nitroso-6-(4-bromothenyloxy)pyrimidine	486.44	7.2415	0.0337	-1.1854
392	O6-(4bromothenyl)-9-(10-aminodecyl)guanine	481	4.8775	0.0599	-2.4305
422	6-nitroveratryl alcohol	213	4.7944	0.0953	0.1078
423	6-nitropiperonyl alcohol	197	5.2115	0.0839	-0.0913
433	2-Amino-4-(4-bromothenyl)oxy-6-morpholino-5-nitropyrimidine	416.29	6.3208	0.0312	1.1526
436	2-Amino-4-benzyloxy-6-[N-(4-(4-aminophenoxy)anilino)]-5-nitropyrimidine	444	4.8981	0.0667	-1.5567
	Red indicates the structural outliers

## Sheet: Table S5
Table S5. The value of each molecular descriptor in the 2D-QSAR-Full model and the response endpoint pIC50
The modeling dataset (N=370)
No.	MATS6i	nCp	O-060	B03[O-S]	SsNH2	maxHBd	hmin	MDEN-12	minaaCH	pIC50	Pred. pIC50 by 2D-QSAR-Full model
1	-0.041	0	1	0	5.47977	0.648908	0.131806	1.33748	1.51345	4.65758	6.1889
2	0.053	0	1	0	5.60284	0.636329	0.00409722	1.33748	1.53588	7.39794	6.636
5	0.009	0	1	1	5.60396	0.632608	4.62963e-05	1.33748	1.557	7.61979	7.1279
6	-0.062	0	2	0	5.5594	0.650548	0.0718056	1.33748	1.51244	6.9393	6.478
8	0.068	0	1	0	5.59049	0.642502	0.0240972	1.3732	1.52353	6.36653	6.8657
9	-0.011	0	3	0	5.64008	0.641329	-0.0163109	1.33748	1.52006	7.69897	7.2241
10	-0.005	0	1	0	5.67723	0.627961	-0.0590671	1.33748	1.54333	6.82391	6.7468
13	0.021	1	1	0	5.63273	0.630156	-0.0359028	1.33748	1.54109	4.23657	6.3638
15	0.121	1	1	1	5.62807	0.627608	-0.0277315	1.33748	1.56111	5.04576	6.7785
16	-0.079	1	2	0	5.56212	0.655978	0.107431	1.33748	1.49904	5	6.1889
17	-0.049	1	1	1	5.63386	0.626435	-0.0399537	1.33748	1.56221	6.18709	6.3618
18	0.039	0	1	1	5.68525	0.623476	-0.0722326	1.33748	1.56523	7.52288	7.2744
21	-0.011	0	3	0	5.58007	0.654906	0.0404493	1.33748	1.46617	7.04576	7.1257
24	0.11	0	2	0	5.54117	0.667163	0.0440972	1.33748	1.93083	6.60206	7.0795
33	0.107	0	1	0	5.57506	0.691052	0.0240972	1.50854	1.94318	7.12494	7.2085
34	0.048	2	1	0	5.71178	0.623211	-0.0549221	1.33748	1.9568	6.63827	6.3132
37	0.058	0	1	0	5.62365	0.641227	-0.00673611	1.33748	1.55134	7.1549	6.5439
39	-0.01	0	2	0	5.64069	0.641416	-0.000473356	1.33748	1.52067	7.45593	6.9086
40	0.095	2	1	0	5.68206	0.631475	-0.044718	1.33748	1.37347	6.39794	5.9425
41	0.023	1	3	0	5.83703	0.624628	-0.153018	1.10521	1.38153	6.12494	6.4553
42	0.047	0	1	1	5.63742	0.627145	-0.0290175	1.33748	1.57047	8.34679	7.2835
43	0.135	0	1	0	5.54533	0.699316	0.0343013	1.50854	1.35984	7.09691	7.2429
44	0.007	0	1	0	5.6393	0.641916	-0.0132554	1.33748	1.51928	6.63827	6.6404
45	0.148	0	2	0	5.51144	0.675427	0.0543013	1.33748	1.3475	7.69897	7.1923
46	0.047	0	2	0	5.56198	0.65468	0.0579167	1.52418	1.4785	8.22185	7.1425
47	-0.05	0	2	0	5.54705	0.656721	0.0918056	1.3732	1.33052	6.45593	6.5334
48	0.033	0	1	1	5.59161	0.638781	0.0200463	1.3732	1.54465	7.48149	7.161
49	0.056	1	1	1	5.8822	0.606775	-0.165167	1.10521	1.4267	6.45593	6.891
50	-0.04	0	1	0	5.59284	0.641329	0.0179861	1.34123	1.52588	6.88606	6.3511
51	-0.138	1	1	0	5.595	0.644928	-0.0742404	1.41037	1.29927	6.25964	6.2848
52	0.038	1	1	1	5.80091	0.615907	-0.145874	1.10521	1.41847	6.04576	6.8113
53	0.047	0	1	1	5.63742	0.627145	-0.0290175	1.33748	1.57047	8.46852	7.2924
54	0.023	0	1	1	5.63462	0.627361	-0.0284174	1.33748	1.56766	8.39794	7.2196
55	0.052	0	1	0	5.58284	0.672047	0.0140972	1.33748	1.49588	5.85387	6.6891
56	0.107	0	1	1	5.60654	0.63674	-0.0138426	1.52418	1.52306	8.30103	8.0753
57	0.037	0	1	0	5.55866	0.648675	0.0240972	1.33748	1.37219	5.22185	6.8846
58	0.092	0	2	0	5.56644	0.662826	0.0231852	1.33748	2.02515	6.64782	7.0722
59	0.108	0	1	0	5.59066	0.643534	0.00837538	1.33748	1.38271	7.52288	6.7396
60	0.12	0	2	1	5.57576	0.657979	0.0109825	1.33748	2.28466	6.61979	7.7658
61	0.052	0	1	1	5.65824	0.632043	-0.0398508	1.33748	1.57909	7.60206	7.3129
62	0.124	0	1	1	5.60965	0.681867	-0.00901749	1.50854	2.30029	7.34679	7.8639
63	0.117	0	1	0	5.59393	0.649492	0.00346797	1.33748	1.36602	7.05552	6.8348
64	-0.005	0	1	1	0	0.56233	0.0200463	0	1.48676	5.72125	5.8435
65	0.035	0	1	1	0	0.556867	-0.00901749	0	1.50351	6.52288	6.0219
66	-0.071	0	2	0	0	0.58027	0.0918056	0	1.42855	4.55284	5.2971
67	0.026	0	1	1	5.63549	0.627082	-0.0502393	1.33748	1.53547	7.52288	7.2895
69	0.029	0	1	0	5.62039	0.63527	-0.0018287	1.33748	1.96496	7.69897	6.5877
70	0.079	0	1	0	0	0.606052	0.0440972	0	1.42477	5.23657	5.5052
71	0.023	0	1	1	5.63462	0.627361	-0.0284174	1.33748	1.56766	8.09691	7.2393
72	0.089	0	2	1	5.57295	0.658195	0.0115826	1.33748	2.25345	6.61439	7.7662
73	-0.085	0	2	1	5.6296	0.633476	-0.0203619	1.33748	1.54611	7.78252	7.3086
74	0.131	0	1	0	10.8634	0.666844	0.0543013	2.14426	1.29194	7.75696	6.9374
75	0.106	0	1	1	11.027	0.627361	0.0172076	1.68179	1.59555	6.76955	6.6243
76	0.038	0	3	0	11.0379	0.641329	0.0293141	1.68179	1.5172	6.09691	6.5316
77	0.099	0	1	0	11.014	0.631993	0.0288102	1.68179	1.55426	5.30103	5.9637
78	0.164	0	1	0	10.904	0.644594	0.0599263	1.68179	1.36249	5.39794	6.1005
79	0.069	0	1	1	10.8342	0.66322	0.0344213	1.68179	1.96939	5.63827	6.6028
80	0.088	0	1	1	10.9657	0.632608	0.0456713	1.68179	1.57852	6.39794	6.5333
81	0.035	0	3	0	10.9064	0.671942	0.0180641	1.68179	1.71039	6.30103	6.6441
82	0.046	0	1	1	5.61177	0.632169	-0.0482236	1.33748	1.49523	7.14267	7.3355
83	0.196	0	1	0	5.60284	0.636329	-0.00715278	1.33748	1.62014	8	7.0135
84	0.078	0	1	1	10.9864	0.649612	0.0115826	2.14426	2.18314	8.04576	7.4976
85	0.107	0	1	1	10.9921	0.649396	0.0109825	2.14426	2.21435	7.34679	7.5372
86	0.051	0	1	0	5.63299	0.628451	-0.0200592	1.33748	1.56603	8.18709	6.6441
87	0.094	0	1	1	5.60684	0.682084	-0.00841735	1.50854	2.26908	7.95861	7.797
88	-0.016	0	1	1	5.65217	0.626302	-0.0343433	1.33748	2.29802	8.22185	7.1384
89	0.028	0	1	1	5.65543	0.632259	-0.0392507	1.33748	1.57677	7.60206	7.2758
90	0.107	0	1	1	5.60654	0.63674	-0.0138426	1.52418	1.52306	8.55284	7.7651
91	0.037	0	1	1	5.66527	0.622114	-0.056881	1.33748	1.57832	7.82391	7.2683
92	0.052	0	1	0	5.61576	0.638166	0.00318515	1.3732	1.53227	6.69897	6.691
93	0.109	0	1	0	5.62396	0.637039	-0.00496656	1.3732	1.537	6.60206	6.7723
94	-0.01	0	1	0	5.61738	0.639138	-0.0161025	1.34123	1.53654	7.39794	6.4326
95	0.114	1	1	0	5.75241	0.675503	-0.0516512	1.10521	1.57494	5.09691	6.1932
96	0.12	1	1	1	5.787	0.67183	-0.0847659	1.10521	1.60953	6.48149	6.906
97	-0.015	0	2	0	5.59286	0.645085	0.0427418	1.33748	1.52591	7.69897	6.616
98	0.244	0	1	1	5.63742	0.627145	-0.0402675	1.33748	1.66448	8.1549	7.7172
99	0.202	0	1	1	5.60396	0.632608	-0.0112037	1.33748	1.64773	8	7.6064
100	0.182	0	1	0	5.6281	0.631993	-0.0280648	1.33748	1.6308	7.69897	6.9163
101	0.205	0	1	0	5.57311	0.644594	0.0030513	1.33748	1.37547	7.74473	7.0414
102	0.027	2	1	1	6.06149	0.558797	-0.209841	1.10521	1.59798	6.65758	6.5141
103	0.085	1	1	1	6.09199	0.548819	-0.213763	1.10521	1.71168	6.49485	6.7798
104	0.119	0	3	0	5.64008	0.641329	-0.0275609	1.33748	1.60094	8.18709	7.5538
105	0.21	0	2	0	5.66788	0.647083	-0.0272591	1.10521	1.29166	6.82391	6.9473
106	0.023	1	2	1	5.78629	0.616513	-0.0905408	1.10521	1.52574	6.63827	6.9952
107	0.223	0	2	1	5.70247	0.637899	-0.0603738	1.10521	1.32625	8.31876	7.6342
108	0.006	1	1	0	0	0.546052	-0.0159028	0	1.59143	4.12494	5.0066
109	-0.01	0	2	0	5.5594	0.650548	0.0605556	1.33748	1.5838	7.4437	6.758
110	0.058	0	1	1	5.60587	0.678227	-0.0290175	1.33748	2.27174	7.74473	7.3899
111	-0.046	1	1	1	0	0.54233	-0.0199537	0	1.61256	4.85387	5.5349
112	0.006	0	1	1	5.65498	0.626086	-0.0349434	1.33748	2.32922	8.55284	7.1585
113	0.058	0	0	0	5.7515	0.581219	0.0795028	1.33748	1.68454	5.09691	5.8555
114	0.086	0	1	1	0	0.596867	0.0109825	0	1.45936	5.85387	6.1237
115	0.03	0	1	0	5.58718	0.640087	0.0290046	1.3732	1.54022	7.1549	6.5693
116	0.092	0	1	0	5.6363	0.630866	-0.0249666	1.33748	1.54934	7.65758	6.8259
117	-0.027	0	1	1	5.65812	0.621995	-0.0522549	1.33748	1.57463	8.02228	7.1194
118	0.077	0	1	0	5.63339	0.628576	-0.0197114	1.33748	1.56643	8.04576	6.6369
119	0.083	2	1	1	6.06741	0.561336	-0.216873	1.10521	1.45903	7.60206	6.5702
120	0.016	0	1	1	5.69636	0.708723	-0.0681951	1.10521	1.41186	6.30103	6.9964
121	0.026	1	2	1	5.89974	0.585172	-0.130656	1.10521	1.75633	6.61979	6.9041
122	0.025	0	1	1	5.61177	0.632169	-0.0482236	1.33748	1.49523	6.69897	7.2075
124	0.061	1	1	1	5.83438	0.610444	-0.15314	1.10521	1.43194	7.09691	6.8083
125	0.191	0	2	1	5.56569	0.682354	-0.0203738	1.33748	2.1769	6.82391	7.9813
126	0.009	1	1	1	5.56505	0.647553	-0.0251569	1.33748	2.1919	7.34679	6.9661
127	-0.02	0	1	1	5.74748	0.616458	-0.120235	1.33748	1.57132	7.30103	7.2047
128	-0.125	0	2	1	5.76012	0.621513	-0.0805408	1.10521	1.51186	6.60206	6.7772
129	0.061	1	1	1	5.83438	0.610444	-0.15314	1.10521	1.43194	6.9393	6.7348
130	0.102	1	1	1	5.80083	0.609475	-0.0847659	1.10521	1.67727	6.55284	6.8082
131	0.109	1	1	1	5.90646	0.589139	-0.125438	1.10521	1.72448	5.92082	6.8513
132	0.071	1	1	1	5.79226	0.612921	-0.0928284	1.10521	1.69116	6.82391	6.5326
134	0.007	0	1	1	5.61245	0.640647	-0.0120002	2.49019	1.51507	8.20066	9.0992
138	0.002	0	1	1	5.63549	0.627082	-0.0502393	1.33748	1.53547	6.82391	7.2994
139	-0.067	0	1	1	5.70408	0.621024	-0.084096	1.33748	1.56445	6.12494	7.1422
140	0.036	1	1	1	5.86223	0.602631	-0.15314	1.10521	1.58152	7.02228	6.6238
141	-0.003	0	1	0	5.63043	0.631814	-0.0172558	1.33748	1.54694	6.82391	6.5257
142	0.011	0	1	1	5.45307	0.65159	0.0684783	0.707107	1.07476	4.30103	5.7781
144	0.145	0	1	1	5.40636	0.657758	0.0253575	1	1.07476	6.49485	6.7238
145	-0.05	0	1	1	5.74748	0.616458	-0.120235	1.33748	1.57132	6.65758	7.114
146	0.135	0	1	1	11.0326	0.627145	0.0166075	1.68179	1.59994	6.56864	6.5333
147	-0.012	0	1	1	11.2527	0.616458	-0.0746105	1.68179	1.60145	5.18709	6.3741
148	0.099	0	1	1	11.1283	0.623476	-0.0266076	1.68179	1.59213	6.82391	6.5829
151	-0.162	1	1	0	5.60812	0.638704	-0.0505556	1.47776	1.52035	5.07058	6.1438
154	0.2	1	1	1	11.0139	0.627608	0.0178935	1.68179	1.58533	5.56864	6.4519
155	-0.025	0	1	0	5.70295	0.624746	-0.0800451	1.33748	1.54333	7.72125	6.3528
156	-0.028	0	2	0	5.69271	0.628369	-0.0690671	1.33748	1.53676	7.95861	6.7349
157	0.068	0	1	0	5.75747	0.616603	-0.118387	1.33748	1.56191	7.04576	6.7297
158	0.07	2	1	1	0	0.594283	-0.121615	0	1.39035	4.20761	5.8657
159	-0.053	1	1	1	0	0.592423	-0.0651569	0	1.54081	5.58503	5.6173
160	-0.012	0	1	0	5.64776	0.6275	-0.0349594	1.33748	1.55038	7.61979	6.5402
161	-0.04	0	1	0	5.60877	0.636081	-0.031682	1.33748	1.48362	7.74473	6.3876
163	-0.054	0	1	1	5.70408	0.621024	-0.084096	1.33748	1.56445	7.82391	7.0041
164	0.044	0	1	0	5.64477	0.629739	-0.0372539	1.33748	1.55312	5.02228	6.5406
165	0.114	0	1	0	5.6367	0.630992	-0.0246188	1.33748	1.54974	7.30103	6.6812
166	-0.027	0	1	0	5.62871	0.631791	-0.0333207	1.33748	1.51745	7.52288	6.3384
167	-0.055	0	1	0	5.73946	0.620943	-0.10707	1.33748	1.54941	6.25964	6.4986
168	-0.008	0	1	0	5.73006	0.621991	-0.0968044	1.33748	1.54839	6.14267	6.4796
169	-0.14	0	1	1	5.8097	0.609441	-0.168238	1.33748	1.57741	5.95861	6.9475
170	-0.069	0	2	0	5.62848	0.637197	-0.0163109	1.33748	1.52499	5.95861	6.6012
173	0.072	0	2	0	5.62419	0.636989	-0.0115278	1.33748	1.52681	6.82391	6.9192
174	-0.097	0	3	0	5.64983	0.637857	-0.0319359	1.33748	1.51593	6.63827	6.8072
175	0.069	0	1	0	5.69007	0.623761	-0.0779682	1.33748	1.56189	5.63827	6.9423
176	0.014	2	3	1	5.9455	0.601867	-0.254807	1.10521	1.57414	6.82391	7.2263
177	-0.013	0	1	0	5.657	0.625716	-0.0482039	1.33748	1.55351	6.92082	6.2766
178	0.074	0	1	1	5.70838	0.619682	-0.088581	1.33748	1.57448	6.79588	7.3048
179	-0.011	0	1	0	5.69397	0.619593	-0.0801219	1.33748	1.56006	6.52288	6.4854
181	-0.096	0	1	0	5.73674	0.619389	-0.103477	1.33748	1.56059	7.12494	6.3646
182	0.108	0	1	1	5.92874	0.592073	-0.141558	1.10521	1.67004	6.85387	7
183	0.09	1	1	1	5.85054	0.594806	-0.1127	1.12468	1.71706	6.38722	6.7002
184	0.086	3	2	1	5.89274	0.590722	-0.129131	1.12468	1.70288	6.36653	6.6407
193	0.063	1	1	1	11.3783	0.59524	-0.0990013	1.41714	1.74672	6.52288	5.9202
194	0.014	1	1	1	5.82013	0.602466	-0.101775	1.16286	1.66949	6.11351	6.5615
195	-0.15	0	1	1	5.91426	0.599275	-0.136348	1.10521	1.61031	6.60206	6.512
196	0.111	1	1	1	5.87379	0.594602	-0.124436	1.12168	1.68071	6.46852	6.8187
197	0.2	0	1	1	5.8972	0.608657	-0.130179	1.10521	1.51843	5.97881	7.3144
198	0.016	0	2	1	5.70331	0.62399	-0.0845783	1.33748	1.55757	7.46852	7.654
199	-0.02	1	1	1	11.3639	0.603052	-0.0850159	1.53983	1.70227	6.52288	5.7965
200	-0.006	0	2	1	5.70331	0.62399	-0.0845783	1.33748	1.55757	6.79588	7.5333
201	0.124	1	1	1	5.88543	0.596004	-0.126914	1.12168	1.6713	6.28819	6.7766
202	0.134	0	1	1	5.85362	0.60164	-0.115769	1.12168	1.65472	6.50169	7.0414
203	0.02	1	1	1	5.7734	0.615639	-0.102283	1.12468	1.50656	6.23657	6.6127
204	0.023	1	2	1	5.80451	0.610278	-0.0939627	1.10521	1.62949	6.95861	6.8977
205	-0.013	1	1	1	5.74664	0.618445	-0.0772034	1.10521	1.62227	6.82391	6.4348
206	0.071	1	1	1	5.84782	0.602209	-0.115554	1.17421	1.626	5.9393	6.7787
207	-0.008	1	1	1	5.82782	0.60933	-0.105174	1.10521	1.73453	6.48149	6.7177
208	0.105	0	1	0	5.89415	0.601257	-0.108443	1.10521	1.63545	5.25964	6.3301
209	-0.113	0	1	1	5.82409	0.610608	-0.10537	1.17421	1.59214	6.20761	6.5371
210	-0.114	1	1	1	5.86129	0.604031	-0.118377	1.17421	1.61267	6	6.4069
211	0.084	1	1	0	5.81595	0.60399	-0.0795849	1.12468	1.68247	4.69897	6.2862
214	0.059	1	1	0	11.3276	0.604424	-0.0658866	1.41714	1.71213	5.00877	5.0651
216	0.1	0	1	1	5.84577	0.756885	-0.106527	1.10521	1.71122	6.88606	7.4634
217	-0.009	0	1	1	5.81547	0.60024	-0.0990013	1.32	1.70675	6.79588	7.2761
218	0.084	0	1	1	5.77664	0.609225	-0.0850159	1.41714	1.65116	6.9393	7.6549
219	-0.009	0	1	1	5.85219	0.597105	-0.10974	2.23554	1.73075	6.92082	8.5361
220	0.129	1	1	1	5.76757	0.607585	-0.0866556	1.10521	1.63561	7.12494	6.9127
221	-0.02	1	1	1	11.3639	0.603052	-0.0850159	1.53983	1.70227	4.63827	5.6404
222	0.059	1	1	0	11.3276	0.604424	-0.0658866	1.41714	1.71213	3.9914	4.9444
223	0.034	0	2	1	5.91913	0.589829	-0.12758	1.10521	1.76741	7.4437	6.9207
225	0.121	1	1	1	5.62807	0.627608	-0.0277315	1.33748	1.56111	7.02228	7.0716
227	0.063	0	1	0	5.73612	0.606752	-0.0953387	1	1.88325	3.76447	5.9382
228	-0.212	1	1	1	5.59549	0.649927	-0.0537659	1.10521	1.0779	6.72125	5.9113
229	-0.172	1	1	1	5.7309	0.619067	-0.0901741	1.10521	1.45576	7.09691	6.1359
230	0.074	0	1	1	5.93271	0.581285	-0.134693	1.10521	1.81153	7.29243	6.9738
231	-0.009	0	1	1	5.72623	0.621069	-0.0669993	1.53983	1.55977	7.37675	7.4966
232	0.098	1	1	1	5.80914	0.59524	-0.0928284	1.10521	1.78227	6.80688	6.6963
233	0.118	0	1	1	5.87833	0.582238	-0.117003	1.10521	1.83982	7.7167	6.9544
234	0.033	0	2	0	5.88454	0.599013	-0.0944649	1.10521	1.73282	7.31876	6.4714
235	-0.031	1	1	1	5.84164	0.589067	-0.105174	1.10521	1.80227	7.04576	6.5649
236	-0.072	0	1	1	5.95859	0.583346	-0.149067	1.10521	1.71595	7.07058	6.7396
237	-0.098	0	1	1	5.9412	0.58637	-0.146044	1.10521	1.69856	7.12494	6.422
238	-0.058	1	1	1	5.87516	0.588737	-0.121581	1.09205	1.74944	6.30103	6.4839
239	-0.054	1	1	1	5.89254	0.585714	-0.124604	1.09205	1.80268	6.4437	6.2391
241	0.005	1	1	1	11.4655	0.586044	-0.113198	1.32	1.82859	5.55596	5.4034
242	0.057	0	2	1	5.93608	0.587042	-0.132918	1.10521	1.77847	7.70997	7.259
243	0.113	0	1	1	5.78331	0.604248	-0.0838201	1.10521	1.71102	7.27572	7.2026
244	0.259	0	1	1	5.88164	0.58524	-0.119001	1.10521	1.80227	6.79588	7.5177
245	-0.045	0	1	0	5.63076	0.631918	-0.0170003	1.33748	1.54727	7.34679	6.5226
246	0.015	0	1	1	5.96158	0.577903	-0.153415	1.10521	1.71521	7.13077	7.0208
247	0.023	1	1	1	5.9126	0.579731	-0.135175	1.03861	1.79002	6.98088	6.6656
248	0.059	0	2	1	5.96455	0.584687	-0.151968	1.10521	1.77486	7.58503	7.1572
249	0.022	0	2	1	5.97196	0.583859	-0.192704	1.10521	1.77673	6.56864	7.1113
251	0.034	0	2	1	5.96821	0.574288	-0.148746	1.10521	1.82574	6.58503	7.3066
252	0.114	1	1	1	5.74664	0.624556	-0.0884534	1.10521	1.66018	7.63827	6.9295
253	0.036	1	1	1	6.06182	0.555129	-0.446614	1.10521	1.83649	7.35655	7.4849
254	0.021	0	1	1	6.00625	0.570173	-0.168511	1.10521	1.7867	6.26761	6.6971
256	-0.003	0	2	1	5.92114	0.593678	-0.125259	1.10521	1.745	7.33724	7.2651
257	0.132	0	1	0	5.70076	0.622845	0.149473	1.10521	1.61476	3.39794	5.8867
258	0.014	0	2	0	5.78482	0.596226	-0.0638471	1.19055	1.75662	5.05552	6.6673
259	0.018	0	2	0	5.76471	0.618476	-0.0646669	1.33748	1.90326	7.82391	7.0148
260	0.018	0	2	1	5.81941	0.587042	-0.0872929	1.19055	1.81559	5.52288	7.2072
261	0.022	0	2	1	5.7993	0.609292	-0.0929179	1.33748	1.9997	7.90658	7.3917
262	0.034	0	1	1	5.94063	0.578245	-0.224301	1.10521	1.80718	8.07572	7.0175
263	0.074	0	1	1	5.91469	0.590293	-0.125684	1.10521	1.76028	6.88606	7.0363
264	-0.064	0	2	1	5.93375	0.584295	-0.134491	1.10521	1.79076	6.79588	7.0873
265	0.076	1	1	1	11.1203	0.594806	-0.116172	1.58198	1.70018	7.284	6.3329
266	0.187	0	1	1	5.84313	0.596413	-0.102828	1.10521	1.76061	7.39794	7.2385
267	0.072	0	2	1	5.93628	0.587106	-0.132854	1.10521	1.7788	6.79588	7.3328
270	-0.004	1	1	1	5.86309	0.593064	-0.128509	1.03861	1.67121	6.88606	6.3889
271	0.014	0	1	1	5.91421	0.584101	-0.137203	1.00291	1.75349	6.73874	6.6652
272	0.023	0	1	0	5.69639	0.625298	-0.0647919	1.33748	1.54118	7.04096	6.7685
273	0.138	0	1	1	5.93644	0.580448	-0.13553	1.10521	1.81979	6.88606	7.2908
274	0.072	0	1	1	5.63782	0.62727	-0.0286698	1.33748	1.57087	7.76955	7.258
275	0.172	0	1	1	5.71298	0.613256	-0.0567953	1.10521	1.69547	7.30103	7.2432
276	0.015	0	2	1	11.2243	0.613669	-0.133293	1.06789	1.63626	7	5.7997
278	0.029	0	2	1	5.91913	0.589829	-0.13883	1.10521	1.75977	7.22185	7.2104
279	-0.111	1	1	0	5.15234	0.619098	0.0196759	0	1.68376	5.1549	3.6266
280	0.085	1	1	1	5.84972	0.588762	-0.105479	1.10521	1.82045	7.09691	6.8174
281	-0.013	0	1	1	5.925	0.584839	-0.129707	1.10521	1.80702	6.30103	6.7946
282	0.011	0	2	0	5.88454	0.599013	-0.105715	1.10521	1.71543	6.60206	6.4862
283	-0.019	0	4	0	5.92178	0.604013	-0.126123	1.10521	1.69623	6.85387	7.2019
284	0.008	0	2	1	5.88566	0.595292	-0.109766	1.10521	1.74302	7.39794	7.2291
286	0.009	1	1	1	5.93539	0.580332	-0.144655	1.00291	1.76325	6.2636	6.4909
287	0.198	0	2	1	5.82604	0.623944	-0.102238	1.10521	1.35551	8.1549	7.6038
288	0.013	0	1	1	5.99042	0.567452	-0.163982	1.10521	1.73411	6.29542	6.7527
289	0.018	1	1	1	5.96034	0.568637	-0.15271	0.961125	1.82947	7.05799	6.4159
291	0.006	0	1	1	5.92978	0.595804	-0.135355	1.10521	1.66547	6.45593	6.9511
292	0.147	0	4	1	5.85233	0.627416	-0.108155	1.10521	1.33632	8.1549	8.3404
294	-0.208	0	1	1	5.87087	0.590707	-0.109707	1.10521	1.81005	6.39794	6.4141
295	0.071	0	1	1	5.92576	0.584757	-0.13122	1.03861	1.79919	6.82391	6.9779
296	0.084	0	1	1	5.84668	0.612536	-0.110894	1.10521	1.45717	6.69897	7.2331
297	0.292	0	1	1	5.76433	0.619882	-0.0862029	1.10521	1.42	7.30103	7.5411
298	0.109	1	1	1	5.83641	0.605959	-0.11405	1.20855	1.44683	7.88606	6.6619
299	-0.061	1	1	0	0	0	0.0275566	0	2.09638	4.02228	3.6065
300	-0.118	1	1	0	0	0	0.0294084	0	2.00662	4.33724	3.5036
301	-0.126	1	1	0	0	0	0.0484086	0	2.00089	4.22185	3.5929
302	0.076	1	1	0	0	0	0.0665149	0	2.08938	4.26761	3.9345
303	-0.022	1	0	0	0	0	0.0341144	0	1.73655	4.56864	3.5067
304	0.012	0	1	1	5.96115	0.571363	-0.154004	0.896378	1.80827	6.46218	6.5835
305	0.02	0	1	1	5.96468	0.571138	-0.148949	1.10521	1.84203	6.64782	6.9523
306	-0.03	0	1	1	11.6615	0.618403	-0.103407	2.48547	1.92247	6.39794	8.0162
307	-0.019	0	1	0	11.5924	0.627587	-0.070292	2.48547	1.89971	6.30103	6.7708
309	0.004	0	2	1	11.263	0.604415	-0.148921	0.951883	1.67285	7.17393	5.6681
310	0.071	0	0	0	5.67742	0.607145	0.151519	1.57739	1.61047	4.90309	6.3619
311	-0.042	1	1	0	5.20171	0.608851	-0.042669	0	1.69541	3.69897	4.038
312	0.086	1	1	1	5.89197	0.597259	-0.121225	0.996131	1.7027	5.9393	6.7162
313	0.054	0	2	1	5.96455	0.584687	-0.154254	1.10521	1.76586	6.88606	7.4465
314	0.037	0	2	0	5.92996	0.593871	-0.144007	1.10521	1.72152	6.86967	6.8232
315	0.215	0	2	0	5.66788	0.647083	-0.0385091	1.10521	1.43653	7.37675	7.1949
316	0.249	0	2	1	5.70247	0.637899	-0.0716238	1.10521	1.48087	7.88606	7.9193
317	0.145	2	0	0	0	0.44376	0.0439493	0	1.89087	4.1549	4.5316
318	0.09	0	1	1	5.86568	0.601217	-0.123534	1.20855	1.47142	7.02228	6.8642
319	-0.099	3	0	0	0	0.659816	0.056701	0	1.8678	4.1549	4.2146
320	0.009	0	1	1	5.87267	0.592599	-0.177287	1.19055	1.84561	5.56067	7.1711
321	0.07	0	1	1	5.82233	0.594494	-0.114747	1.10521	1.64474	6.30103	7.0171
323	0.132	0	2	1	5.81909	0.627416	-0.0987658	1.03861	1.34317	8	7.4048
325	0.182	1	1	1	5.78155	0.616522	-0.0929235	1.20855	1.42264	7.30103	7.2261
326	0.15	0	1	1	5.8395	0.617212	-0.10897	1.18811	1.40567	8	7.3914
327	0.053	0	1	1	6.05968	0.589044	-0.203921	1.10521	1.36043	7.42022	7.0894
328	0.077	0	2	1	5.81359	0.628566	-0.0961844	1.10521	1.33959	8.30103	7.4063
329	0.126	1	1	0	5.66504	0.637393	-0.0409349	1.45453	1.86479	8.22185	6.8673
330	0.168	0	4	1	5.85233	0.627416	-0.119405	1.10521	1.48575	7.24413	8.329
331	0.22	0	2	1	5.82604	0.623944	-0.113488	1.10521	1.50156	8.22185	7.7371
332	-0.06	0	3	1	5.79562	0.641509	-0.0822816	1.10521	1.29889	8.04576	7.4083
333	-0.068	1	0	0	0	0.439547	0.0619354	0	1.90732	3.72125	4.2581
334	0.075	0	2	1	5.84528	0.611421	-0.116751	1.10521	1.40892	8.39794	7.3535
335	0.064	1	0	0	5.20217	0.600209	0.0556365	0.2	1.72976	3.63827	3.8707
336	-0.015	0	0	0	5.07415	0.634485	0.425	0.2	1.5037	3.12494	3.0964
337	0.294	1	2	1	5.8277	0.628566	-0.112434	1.09205	1.48131	8.39794	7.7177
339	-0.042	2	0	0	0	0.450679	0.120571	0	1.70372	4.39794	3.9135
340	0.017	2	0	0	0	0.449815	0.112969	0	1.70946	4.52288	4.2026
341	0.003	0	1	1	5.9065	0.59112	-0.140388	1.10521	1.51567	8.22185	6.8213
342	0.251	0	2	1	5.94017	0.593816	-0.309529	1.10521	1.45778	8.09691	8.2178
343	-0.049	1	0	0	5.12703	0.622246	0.125571	0.2	1.57872	3.79588	3.5033
344	0.018	1	0	0	5.14742	0.618156	0.088076	0.2	1.5858	3.82391	3.7995
345	0.015	1	0	0	5.12984	0.62203	0.117969	0.2	1.58446	3.79588	3.8036
346	0.03	2	0	0	0	0.436492	0.0759941	0	1.71519	4.39794	4.1303
347	-0.061	1	0	0	5.18556	0.618462	0.123263	0.25	1.60181	3.61979	3.5905
348	0.052	6	3	1	6.01398	0.586663	-0.188253	1.07272	1.40215	6.33724	6.2776
349	-0.005	0	1	1	5.89639	0.611012	-0.139418	1.10521	1.34908	6.63827	6.7405
350	-0.158	0	0	0	0	0.446366	0.36857	0	1.70475	3.69897	3.4849
351	0.051	2	1	1	5.97982	0.575741	-0.272005	1.19055	1.45903	8.52288	6.9966
352	0.089	1	1	0	5.17398	0.609172	-0.0603379	0	1.70339	4.22185	4.2712
353	0.008	0	1	1	5.87821	0.603404	-0.124159	1.10521	1.48778	7.30103	6.8865
354	-0.01	2	1	0	0	0	0.0835468	0	1.65408	4.69897	3.2322
355	0.371	0	1	0	0	0	-0.0149306	0	1.49042	3.88606	4.872
356	0.272	0	3	0	0	0	-0.0353387	0	1.47122	4.30103	5.4915
357	-0.167	1	1	0	0	0	0.0972308	0	1.56265	2.22185	3.4378
358	0.145	0	1	1	0	0.600383	-0.134784	0	1.65698	5.82391	6.8854
359	0.263	0	1	1	5.84668	0.612536	-0.122144	1.10521	1.56562	7.52288	7.4532
360	0.037	0	2	1	6.02507	0.594932	-0.30564	1.10521	1.46922	7.1549	7.5967
361	0.105	0	1	1	5.84168	0.607536	-0.110894	1.10521	1.48778	6.30103	7.1843
362	0.049	1	1	0	5.11346	0.621565	0.030685	0	1.68486	3.92082	4.1254
363	-0.072	1	1	0	5.01308	0.652921	0.010685	0.5	1.7695	4.46852	4.5925
364	-0.038	0	1	1	5.95152	0.595047	-0.149229	1.10521	1.49971	6.55284	6.6702
365	0.151	0	1	1	5.86994	0.606211	-0.122779	1.20855	1.4428	7.64782	7.5461
366	0.068	1	1	0	5.84674	0.606314	-0.119991	1.20855	1.42675	6.22185	6.2344
367	0.07	1	3	0	5.83906	0.620143	-0.101343	1.20855	1.39643	6.07572	6.9509
368	0.19	0	2	1	5.85503	0.612081	-0.124529	1.10521	1.40111	8.39794	7.5259
369	0.042	0	4	0	5.81624	0.64275	-0.0834778	1.10521	1.28918	7.52288	6.9564
370	0.135	1	1	1	5.69963	0.628209	-0.0740496	1.45453	2.20224	7.63827	7.3787
371	0.152	1	1	1	5.71974	0.605959	-0.0684246	1.27789	1.61052	6.52288	7.0812
372	0.139	1	1	0	5.68515	0.615143	-0.0353099	1.27789	1.55155	5.22185	6.4102
373	0.129	1	4	0	5.7638	0.64091	-0.0700129	1.10521	1.30974	7.69897	7.4233
374	0.195	0	1	1	5.87544	0.601877	-0.126346	1.20855	1.46361	8.30103	7.5478
375	0.171	1	2	1	5.79947	0.624427	-0.0955811	1.10521	1.35308	8.36653	7.5061
376	0.159	1	1	1	5.81988	0.614223	-0.105785	1.20855	1.41558	7.52288	7.2411
377	0.134	1	2	1	6.02363	0.581886	-0.422477	1.10521	1.44694	7.76955	8.0485
378	0.112	0	1	0	5.53503	0.652955	0.00562075	1.33748	1.33412	7.08092	6.8245
379	-0.154	0	0	0	11.046	0.619314	0.156684	2.14426	2.28399	5.37675	5.6114
380	0.112	0	1	1	5.96194	0.587124	-0.200028	1.10521	1.52786	6.56864	7.2565
381	0.177	0	2	1	5.80957	0.631597	-0.102646	1.10521	1.27698	8.3279	7.6757
382	0.085	0	2	1	5.84694	0.611718	-0.115285	1.10521	1.38933	8.33724	7.5777
383	0.165	0	2	1	5.85974	0.611313	-0.117677	1.10521	1.39682	8.3279	7.6945
384	-0.022	0	1	1	5.72413	0.742639	-0.0672985	1.20855	1.32875	7.58503	7.1982
385	0.117	1	2	0	5.71361	0.641973	-0.0692073	1.10521	1.30306	7.07058	6.6051
386	0.184	1	2	1	5.76115	0.626726	-0.0827195	1.10521	1.36014	8.4437	7.4275
387	0.069	1	2	1	5.94697	0.591743	-0.438191	1.19055	1.44694	8.18709	8.0052
389	0.112	0	1	0	5.53503	0.652955	0.00562075	1.33748	1.33412	6.85387	6.5206
390	0.235	0	1	1	5.76433	0.619882	-0.0974529	1.10521	1.54087	8.34679	7.5383
391	0.169	0	1	1	5.98657	0.601217	-0.169074	1.10521	1.55939	8.3279	7.3719
393	0.195	1	1	1	5.83641	0.605959	-0.1253	1.20855	1.56395	7.61979	6.8411
394	0.247	1	1	1	5.81988	0.614223	-0.117035	1.20855	1.53926	8.38722	7.4135
395	0.255	0	1	1	5.86568	0.601217	-0.134784	1.20855	1.58159	7.2321	7.2177
396	0.247	1	1	1	5.81988	0.614223	-0.117035	1.20855	1.53926	7.47366	7.5483
397	0.226	0	1	1	5.86994	0.606211	-0.134029	1.20855	1.56062	7.66154	7.6709
398	0.263	0	1	1	5.84668	0.612536	-0.122144	1.10521	1.56562	7.01773	7.5504
399	0.086	0	1	1	5.95152	0.595047	-0.160479	1.10521	1.59856	7.59346	7.2026
400	0.181	0	1	1	5.96194	0.587124	-0.198389	1.10521	1.62121	7.34872	7.4307
401	0.265	0	1	1	5.84168	0.607536	-0.122144	1.10521	1.58906	8.60206	7.5008
402	0.219	0	2	1	5.76951	0.630675	-0.107434	1.19055	1.69005	8.73993	7.6737
403	0.301	0	1	1	0	0.626312	-0.0202675	0	1.50351	6.85387	6.845
404	0.248	0	1	0	0	0.635496	0.0128472	0	1.45917	5.53313	6.091
405	0.074	0	4	0	5.82367	0.636351	-0.11082	1.10521	1.24947	6.76447	7.4797
406	0.166	1	1	1	0	0.605125	-0.1253	0	1.64875	6.61979	6.0219
407	0.352	0	2	1	5.85503	0.612081	-0.127392	1.10521	1.53542	8.52288	8.0849
408	0.197	0	1	1	5.87821	0.603404	-0.135409	1.10521	1.58906	7.65758	7.5307
409	0.271	0	2	1	5.81359	0.628566	-0.107434	1.10521	1.49013	8.39794	7.8593
410	0.297	1	2	1	5.76115	0.626726	-0.0939695	1.10521	1.50496	8.22185	7.7097
411	0.222	1	2	1	5.72615	0.629325	-0.0939695	1.19055	1.5236	8.52288	7.6782
412	0.268	0	1	1	5.834	0.618362	-0.117638	1.20855	1.53013	8.22185	7.846
413	0.007	1	1	1	5.97481	0.568923	-0.158828	0.896378	1.81397	6.37779	5.9854
414	0.221	0	1	1	5.77226	0.623161	-0.0987067	1.20855	1.52087	7.23657	7.6133
415	0.183	0	1	1	5.87543	0.609346	-0.114692	1.10521	1.45209	6.75449	7.281
416	0.251	0	1	1	5.72413	0.753889	-0.0785485	1.20855	1.4792	7.44977	7.8106
417	0.297	0	1	1	5.86502	0.609689	-0.129783	1.20855	1.5569	7.23359	7.8334
418	0.025	1	1	1	11.4276	0.579935	-0.126911	1.174	1.80949	6.03152	5.3544
419	0.1	0	1	1	5.90637	0.591669	-0.121557	1.10521	1.77186	5.78252	6.6715
420	0.13	0	4	1	5.83052	0.637833	-0.108815	1.10521	1.21966	8.39794	7.8311
421	0.044	0	4	1	5.83777	0.635282	-0.113917	1.10521	1.20538	8.52288	8.0408
424	0.098	0	3	1	5.8975	0.606829	-0.114148	1.10521	1.6573	6.92082	7.3098
425	0.158	0	3	1	5.91818	0.605165	-0.120202	1.10521	1.66734	6.35655	7.44
426	0.017	3	2	1	5.92525	0.594024	-0.299251	1.10521	1.43056	7.76955	6.8981
427	0.001	0	4	1	5.99061	0.570855	-0.164011	0.961125	1.28728	6.74473	7.6452
428	0.021	3	1	1	5.99111	0.571773	-0.389529	1.10521	1.76157	5.63827	6.7493
429	0.021	3	1	1	5.99111	0.571773	-0.389529	1.10521	1.76157	5.76955	6.7144
430	-0.049	1	1	1	11.355	0.606011	-0.130641	1.4658	1.74672	5.39794	5.8511
431	-0.192	1	1	1	5.7549	0.616636	-0.110676	1.19055	1.67727	5.66555	6.3676
432	0.021	0	1	1	5.94131	0.685207	-0.147911	1.10521	1.80901	7.25181	7.1451
434	0.013	0	1	0	5.72135	0.626568	-0.0578997	1	1.86038	6	5.9752
435	-0.044	0	1	1	11.5342	0.619938	-0.115324	1.38918	1.77888	5.3279	5.9146
437	-0.072	0	2	1	11.4965	0.624938	-0.110324	1.09626	1.71638	4.88606	5.5717
438	0.334	0	2	1	0	0	-0.0874344	0	1.37434	5.18046	6.0025
The true external set (N=66)
Name	MATS6i	nCp	O-060	B03[O-S]	SsNH2	maxHBd	hmin	MDEN-12	minaaCH
7	-0.017	0	1	0	5.58721	0.644142	0.0353472	1.41037	1.52025
11	-0.0913729	1	1	0	5.64828	0.626125	-0.107014	1.33748	1.54051
12	-0.0727831	1	1	1	5.63089	0.622404	-0.111065	1.33748	1.56163
14	-0.097	1	1	0	5.64497	0.62371	-0.102106	1.33748	1.5572
19	-0.0450397	0	1	1	5.62606	0.604622	0.150721	1.33748	1.62651
20	0.017	0	2	0	5.75415	0.595403	0.127654	1.33748	1.63413
22	-0.103213	0	0	0	5.48936	0.619803	0.205692	1.85904	1.57044
23	0.1	0	2	0	5.63422	0.637502	-0.0236806	1.33748	1.52257
25	-0.0225983	1	0	1	5.52199	0.610795	0.181803	1.33748	1.57183
26	0.031	0	2	0	5.54552	0.764198	0.0560743	1.33748	1.34673
27	0.00954573	0	0	1	5.63311	0.601462	0.146541	1.33748	1.57703
28	0.0755088	0	0	0	5.47611	0.611991	0.208747	1.33748	1.62926
29	0.260771	0	1	0	0	0	0.0619444	0	1.94062
30	0.259204	0	0	0	0	0	0.00638889	0	1.96008
31	0.412285	0	0	0	0	0	-0.0304861	0	1.9061
32	0.137449	0	3	0	0	0	0.0415363	0	1.83182
35	0.382759	1	1	0	0	0	-0.000556	0	1.94742
36	0.23661	1	1	0	0	0	0.127153	0	0
38	0.065	0	1	0	5.69338	0.626177	-0.0828756	1.33748	1.5452
68	0.002	0	1	1	5.65812	0.621995	-0.0522549	1.33748	1.57463
123	0.187309	0	1	0	0	0.673682	-0.0179861	0	1.60689
133	0.104461	0	1	1	0	0.533303	-0.00773148	0	1.53617
135	0.150098	0	1	0	0	0.537024	-0.00368056	0	1.51504
136	0.146356	0	1	1	0	0.52784	-0.0367953	0	1.54963
137	0.174	0	1	1	0	0.674961	-0.022037	0	1.62358
143	0.108605	0	3	0	0	0.665417	-0.0383943	0	1.59364
149	-0.0701644	0	1	1	5.5329	0.631412	0.0391435	1.33748	1.5604
150	-0.156855	1	1	0	5.4431	0.714147	0.150903	1.33748	1.47678
152	-0.0912556	1	1	1	5.45869	0.669279	-0.0173148	1.33748	1.29569
153	0.213639	0	1	1	0	0.664498	-0.0511008	0	1.63465
162	0.0574246	1	1	0	5.79979	0.619628	-0.147101	1.10521	1.39735
171	0.05	0	1	1	5.70351	0.614344	-0.0963256	1.33748	1.58349
172	0.0304933	0	1	0	5.71395	0.580774	-0.0159028	0.877205	1.59838
180	0.008	0	1	1	5.74854	0.57159	-0.0490175	0.877205	1.63297
185	0.103219	0	1	0	5.92469	0.510465	-0.0702176	0.877205	1.62045
186	0.123101	0	1	1	5.9215	0.505617	-0.0824203	0.877205	1.6463
187	0.0867428	0	1	1	5.90488	0.51108	-0.0533565	0.877205	1.63283
188	0.128388	0	1	0	5.65143	0.627338	-0.0379861	1.19055	1.66245
189	0.118491	0	1	1	5.63403	0.623617	-0.042037	1.19055	1.67914
190	0.153123	0	1	1	5.65065	0.618154	-0.0711008	1.19055	1.6902
191	0.0623001	0	3	0	5.68867	0.632338	-0.0583943	1.19055	1.6492
192	0.091	0	1	1	5.82277	0.604958	-0.0984149	2.36289	1.69159
212	-0.164359	3	2	0	5.6406	0.633151	-0.076131	1.33748	1.52405
213	0.117672	0	1	0	5.69143	0.607338	-0.0579861	1	1.89162
215	-0.066	0	1	1	5.78586	0.615045	-0.0841961	2.51496	1.63286
224	-0.049	1	1	1	5.63386	0.626435	-0.0399537	1.33748	1.56221
226	0.134	0	1	1	5.72602	0.598154	-0.0911008	1	1.92621
240	0.1006	0	1	1	5.67403	0.603617	-0.062037	1	1.91274
250	0.0772845	0	2	0	5.6995	0.617813	-0.0604652	1.10521	1.72319
255	0.0307043	0	1	0	5.7336	0.608674	0.127963	1.10521	1.70467
268	-0.0214343	0	3	0	5.65744	0.637857	-0.0319359	1.33748	1.52353
269	0.0243364	0	1	0	5.64261	0.614742	-0.081875	1.33748	1.57565
277	0.075	0	0	0	5.64284	0.616329	0.204765	1.57739	1.57588
285	0.148161	0	0	0	0	0.509514	0.176909	0	1.69709
290	-0.176333	0	1	0	5.12736	0.632599	0.0445833	1.09205	1.57926
293	-0.274401	1	1	0	10.4397	0.624561	0.0415278	0	1.62386
308	-0.00982246	1	0	0	0	0	0.00803822	0	1.74609
322	0.0817959	1	0	0	0	0.582232	0.0738221	0	1.71403
324	-0.16045	0	1	0	5.09665	0.631553	0.104931	0	1.60301
338	0.0389386	0	0	0	5.0488	0.634628	0.409722	0.166667	1.54269
388	0.11	1	2	1	5.70383	0.63364	-0.073392	1.33748	2.19592
392	0.0185746	1	1	1	11.4385	0.568731	-0.1478	0.986241	1.84112
422	-0.231584	1	2	0	0	0.649939	0.188399	0	1.22657
423	-0.0228751	1	2	0	0	0.665564	0.228399	0	1.25782
433	0.029	0	1	1	5.75594	0.617384	-0.0910144	1	2.19783
436	-0.0625629	0	2	0	11.4544	0.634122	-0.0772096	1.09626	1.69361

## Sheet: Table S6 
Table S6. The prediction results from quantitative Read-Across
ID	Yeuc(Test)	Ygk(Test)	Ylk(Test)	Sigma value	No.of similar training compounds	Gamma value	Compounds(Euc)	Compounds(Gauss)	Compounds(Laplacian)	Dist.threshold	Sim.threshold	SD Activity(Euc)	SD Activity(GK)	SD(ActivityLK)	SE(EUC)	SE(GK)	SE(LK)	Neff(EUC)	Neff(GK)	Neff(LK)	CVact(Euc)	CVact(GK)	CVact(LK)	CVsim(Euc)	CVsim(GK)	CVsim(LK)	MaxPos(Euc)	MaxPos(GK)	MaxPos(LK)	MaxNeg(Euc)	MaxNeg(GK)	MaxNeg(LK)	g(Euc)	g(GK)	g(LK)	Mean Y(Training)	Avg.Sim(Euc)	Avg.Sim(GK)	Avg.Sim(LK)	SD similarity(Euc)	SD similarity(GK)	SD similarity(LK)	gm(Euc)[Banerjee-Roy Coefficient]	gm(GK)[Banerjee-Roy Coefficient]	gm(LK)[Banerjee-Roy Coefficient]
5	8.0648	8.06246	7.81563	1	6	1	279	279	279	1	0	0.426412	0.426581	0.593838	0.174088	0.174231	0.243699	5.99962	5.9945	5.93785	0.0528733	0.0529096	0.0759808	0.00874649	0.0331773	0.112074	1	0.943504	0.568737	0.90754	0.494171	0.156732	0	0	0	6.69332	0.991641	0.914532	0.504262	0.00867337	0.0303417	0.0565149	1	1	1
6	6.81081	6.888	6.91899				279	279	279			1.13034	1.09278	1.11842	0.461636	0.473189	0.498985	5.99542	5.33327	5.02386	0.165963	0.158649	0.161646	0.0302826	0.387318	0.482868	1	0.640539	0.231924	0.933441	0.312375	0.102534	0.333333	0.333333	0.333333		0.942579	0.359312	0.117422	0.0285437	0.139168	0.0566995	0.666667	0.666667	0.666667
16	5.90055	6.01787	6.29103				279	279	279			1.39557	1.43762	1.57926	0.569846	0.613387	0.697006	5.99774	5.49309	5.13371	0.236515	0.238891	0.251033	0.0212695	0.332774	0.449993	1	0.134222	0.0273864	0.993053	0.121424	0.026292	1	1	0.666667		0.971359	0.0905173	0.0169908	0.0206603	0.0301218	0.00764572	0	0	0.333333
17	6.43632	6.40242	6.61139				279	279	279			0.470113	0.44583	1.26749	0.191968	0.186052	0.526384	5.9972	5.74211	5.79804	0.0730407	0.0696347	0.191712	0.0236818	0.232152	0.204448	0.960948	0.37086	0.123828	1	0.539124	0.163363	0.666667	0.666667	1		0.969699	0.410382	0.117675	0.0229642	0.095271	0.0240583	-0.333333	-0.333333	0
46	6.90151	6.9857	6.95814				279	279	279			0.68852	0.648527	0.647356	0.281204	0.276679	0.277629	5.99504	5.49418	5.43697	0.0997638	0.0928363	0.0930358	0.0315224	0.33238	0.352515	1	0.6384	0.155775	0.937648	0.330926	0.0763797	0.666667	0.666667	0.666667		0.961542	0.447604	0.102337	0.0303101	0.148775	0.0360752	0.333333	0.333333	0.333333
47	6.35285	6.42537	6.77327				279	279	279			1.13101	1.17732	1.34881	0.461819	0.498674	0.57375	5.99776	5.5739	5.52654	0.178032	0.18323	0.199136	0.0211648	0.302879	0.32063	1	0.353273	0.073722	0.96918	0.23647	0.0509876	0.666667	0.666667	0.666667		0.965571	0.229908	0.0511073	0.0204361	0.0696342	0.0163865	0.333333	0.333333	0.333333
51	6.38935	5.84214	5.43724				279	279	279			1.50473	1.5038	1.32457	0.615069	0.809592	0.87785	5.98509	3.45023	2.27671	0.235506	0.257406	0.24361	0.054677	0.94171	1.40088	0.8913	0.126294	0.0173902	1	0.510974	0.164755	1	1	0.666667		0.901295	0.175506	0.042859	0.0492801	0.165276	0.0600401	0	0	-0.333333
56	8.04482	8.06844	8.22347				279	279	279			0.473487	0.473261	0.494055	0.19341	0.194962	0.259747	5.9932	5.89254	3.61783	0.0588561	0.0586558	0.0600786	0.036888	0.14793	0.888899	1	1	1	0.836683	0.300583	0.0856145	0	0	0		0.932274	0.78446	0.356214	0.0343897	0.116045	0.316638	1	1	1
59	6.57972	6.61067	6.77505				279	279	279			0.724057	0.720226	0.798781	0.295727	0.296827	0.351109	5.99465	5.88748	5.17573	0.110044	0.108949	0.1179	0.0327278	0.151441	0.437161	1	0.98969	0.753459	0.940119	0.773003	0.375173	1	1	1		0.954055	0.81975	0.454989	0.0312241	0.124144	0.198903	0	0	0
80	6.09815	6.4846	6.51583				279	279	279			0.754888	0.610945	0.578476	0.309145	0.301542	0.293081	5.96265	4.10495	3.89579	0.12379	0.0942147	0.0887802	0.0866984	0.744299	0.805076	1	0.933418	0.522937	0.979127	0.849623	0.381322	0.666667	0.666667	0.666667		0.908566	0.502247	0.242002	0.0787712	0.373822	0.19483	0.333333	0.333333	0.333333
82	7.88033	7.87851	7.72923				279	279	279			0.424168	0.424148	0.590065	0.173169	0.173196	0.2417	5.99976	5.99736	5.96	0.0538262	0.053836	0.0763421	0.0069812	0.023001	0.0897421	1	0.960454	0.62137	0.914348	0.56907	0.137374	0	0	0		0.986062	0.917848	0.535065	0.0068839	0.0211114	0.0480179	1	1	1
87	7.5245	7.58859	7.49662				279	279	279			0.79726	0.705446	0.585875	0.325839	0.312636	0.325951	5.98677	5.09154	3.23077	0.105955	0.0929615	0.0781518	0.0514899	0.462722	1.01418	1	0.94669	0.633224	0.888874	0.347797	0.0966081	0.666667	0.666667	0.666667		0.928955	0.569997	0.225106	0.0478318	0.26375	0.2283	0.333333	0.333333	0.333333
94	7.29751	7.29517	7.14739				279	279	279			0.432816	0.43377	0.416053	0.176703	0.177144	0.171082	5.99954	5.99604	5.91411	0.0593101	0.0594598	0.0582105	0.00962708	0.0281536	0.132015	0.994281	0.970246	0.651581	1	0.981839	0.720902	0.333333	0.333333	0.333333		0.987149	0.949119	0.601739	0.00950336	0.0267212	0.0794386	-0.666667	-0.666667	-0.666667
97	7.22479	7.25617	7.34371				279	279	279			0.42485	0.424898	0.433698	0.173585	0.18523	0.208811	5.99024	5.26194	4.31387	0.0588045	0.0585568	0.059057	0.0442083	0.410263	0.684861	1	0.892561	0.547182	0.886272	0.320331	0.10314	0	0	0		0.923871	0.506491	0.231546	0.0408427	0.207795	0.158577	1	1	1
105	7.34477	7.40947	7.47059				279	279	279			0.318966	0.293905	0.425811	0.130372	0.138701	0.264878	5.9858	4.4901	2.5843	0.0434277	0.0396662	0.0569983	0.0533578	0.635238	1.25939	1	0.767063	0.411566	0.83437	0.0939886	0.0108593	0	0	0		0.913356	0.353948	0.115547	0.0487347	0.224841	0.145518	1	1	1
106	6.51014	6.59997	7.18421				279	279	279			0.481752	0.482612	0.925678	0.196979	0.22297	0.519011	5.98145	4.68493	3.18102	0.0740002	0.0731233	0.128849	0.0609976	0.580381	1.03122	1	0.874514	0.538667	0.890242	0.390066	0.187865	1	1	0.333333		0.891155	0.403626	0.176796	0.0543584	0.234257	0.182316	0	0	0.666667
109	7.22229	7.23725	7.29694				279	279	279			0.423646	0.411342	0.414631	0.17305	0.178991	0.198056	5.99327	5.28132	4.38273	0.0586582	0.0568368	0.0568225	0.0367062	0.404098	0.665441	1	0.759424	0.332046	0.900595	0.266955	0.0625885	0	0	0		0.936356	0.432677	0.142802	0.03437	0.174844	0.0950266	1	1	1
114	5.85267	6.05761	6.08616				279	279	279			0.743963	0.633176	0.58992	0.304514	0.351545	0.321065	5.9688	3.24404	3.37598	0.127115	0.104526	0.0969281	0.079195	1.00968	0.965771	0.84553	0.0978849	0.0527081	1	0.781414	0.266609	0.333333	0.333333	0.333333		0.895889	0.308513	0.112078	0.0709499	0.3115	0.108242	-0.666667	-0.666667	-0.666667
117	7.34338	7.33814	7.28979				279	279	279			0.790216	0.786828	0.665893	0.322616	0.321413	0.272991	5.99958	5.99283	5.94993	0.107609	0.107224	0.0913461	0.00920426	0.0378955	0.100491	1	0.941485	0.572441	0.980328	0.870994	0.441373	0.333333	0.333333	0.333333		0.984185	0.884635	0.486577	0.00905869	0.0335237	0.0488968	0.666667	0.666667	0.666667
121	6.87611	6.8793	7.15625				279	279	279			0.439599	0.4167	0.457402	0.179583	0.180178	0.192399	5.99219	5.34861	5.65186	0.0639314	0.060573	0.0639165	0.0395437	0.382288	0.271877	1	0.73512	0.261338	0.917451	0.374944	0.13435	0.666667	0.666667	0.333333		0.925617	0.413541	0.176504	0.0366023	0.158091	0.0479874	0.333333	0.333333	0.666667
122	7.70854	7.70257	7.67465				279	279	279			0.54228	0.543776	0.539953	0.221395	0.222087	0.222995	5.99945	5.99507	5.86304	0.070348	0.0705966	0.0703553	0.0104924	0.0314077	0.167427	1	0.978877	0.74796	0.910733	0.591702	0.16862	0	0	0		0.982176	0.930779	0.57456	0.0103054	0.0292336	0.0961971	1	1	1
124	6.75735	6.73846	6.69142				279	279	279			0.664799	0.657248	0.579567	0.271629	0.270732	0.265811	5.99002	5.8936	4.75401	0.0983817	0.0975368	0.0866133	0.044704	0.147186	0.560814	1	1	1	0.98196	0.989064	0.769131	1	1	1		0.946371	0.870747	0.546756	0.0423066	0.128162	0.306628	0	0	0
126	7.61074	7.87383	8.00039				279	279	279			0.727596	0.661417	0.638638	0.297261	0.299333	0.315393	5.99105	4.8825	4.1002	0.0956012	0.084002	0.0798259	0.0423324	0.524076	0.745661	1	0.282012	0.0799514	0.920707	0.0875464	0.0134564	0.333333	0.333333	0.333333		0.961735	0.185626	0.044498	0.0407126	0.0972823	0.0331804	0.666667	0.666667	0.666667
131	6.59689	6.58669	6.55193				279	279	279			0.406627	0.408501	0.413259	0.166027	0.167006	0.173018	5.99839	5.98304	5.70505	0.0616392	0.0620191	0.0630744	0.0179516	0.058327	0.249079	0.970658	0.89351	0.427062	1	0.970154	0.616076	1	1	1		0.971906	0.891972	0.433664	0.0174472	0.052026	0.108016	0	0	0
141	7.14577	7.14703	7.15104				279	279	279			0.405801	0.407811	0.411166	0.165676	0.166566	0.168489	5.99939	5.9944	5.95517	0.056789	0.0570602	0.0574974	0.0110739	0.0334674	0.0950416	0.998118	0.976695	0.706434	1	0.980332	0.684009	0.333333	0.333333	0.333333		0.986385	0.943699	0.630542	0.0109231	0.0315831	0.0599278	-0.666667	-0.666667	0.666667
144	7.09449	6.15179	5.71275				279	279	279			1.62163	2.16044	2.21009	0.662579	1.14698	1.36927	5.99	3.54793	2.6052	0.228575	0.351189	0.386869	0.0447647	0.910689	1.25048	0.915515	0.0835077	0.0156581	1	0.30587	0.0806941	0.666667	0.666667	0.333333		0.919559	0.107744	0.0227702	0.0411638	0.0981213	0.0284736	-0.333333	-0.333333	-0.666667
154	6.09737	6.52689	6.50161				279	279	279			0.949283	0.648578	0.663558	0.388293	0.336538	0.362069	5.97686	3.71412	3.35872	0.155687	0.0993702	0.102061	0.0681634	0.859389	0.971428	0.983689	0.224569	0.0865184	1	0.279313	0.111115	0.666667	0.666667	0.666667		0.92812	0.131073	0.0456382	0.0632638	0.112643	0.0443342	-0.333333	-0.333333	-0.333333
157	5.93781	5.9399	6.27965				279	279	279			0.771074	0.761167	1.00435	0.314837	0.312544	0.432286	5.99818	5.93111	5.39795	0.129858	0.128145	0.159937	0.0190999	0.11806	0.365842	0.967345	0.758242	0.290031	1	0.904622	0.576931	0.333333	0.333333	0.666667		0.96601	0.746785	0.333547	0.0184507	0.0881653	0.122025	-0.666667	-0.666667	-0.333333
165	7.50486	7.49758	7.20137				279	279	279			0.590115	0.596533	1.09434	0.240961	0.244343	0.459708	5.99762	5.96034	5.66681	0.0786311	0.0795635	0.151962	0.0218135	0.0893618	0.265623	1	0.977206	0.801029	0.996317	0.969334	0.624483	0.333333	0.333333	0.666667		0.974618	0.889624	0.555437	0.0212598	0.0794984	0.147537	0.666667	0.666667	0.333333
170	7.33847	7.42501	7.38576				279	279	279			0.51241	0.501309	0.49077	0.209376	0.219583	0.219187	5.98936	5.2121	5.01332	0.0698251	0.0675163	0.0664481	0.0461749	0.425911	0.485976	1	0.833776	0.442071	0.909881	0.375222	0.154707	0.333333	0.333333	0.333333		0.938298	0.520508	0.242908	0.0433258	0.22169	0.118048	0.666667	0.666667	0.666667
178	7.52864	7.52327	7.64332				279	279	279			0.316663	0.320802	0.438464	0.129286	0.131168	0.180509	5.99917	5.98164	5.90026	0.0420611	0.0426413	0.0573657	0.0129093	0.0606881	0.142429	1	0.926785	0.541901	0.961526	0.763965	0.225777	0	0	0		0.983128	0.860687	0.441853	0.0126915	0.0522334	0.0629327	1	1	1
181	6.72921	6.71619	6.64572				279	279	279			0.574922	0.593671	0.598701	0.234776	0.245306	0.261597	5.99669	5.85699	5.23787	0.0854368	0.088394	0.0900882	0.0257517	0.171171	0.417858	0.963254	0.757398	0.332623	1	0.92085	0.599993	1	1	1		0.955253	0.70769	0.340909	0.0245994	0.121136	0.142452	0	0	0
184	7.06751	7.09423	6.6978				279	279	279			0.916922	0.745724	0.573435	0.374774	0.373551	0.241567	5.98584	3.98526	5.63499	0.129738	0.105117	0.0856155	0.0532805	0.778883	0.278803	0.97002	0.0395948	0.0104483	1	0.0646528	0.00969473	0.666667	0.666667	0.666667		0.936315	0.0284536	0.00776181	0.0498873	0.022162	0.00216401	-0.333333	-0.333333	0.333333
193	5.26528	5.24169	5.1908				279	279	279			0.927837	0.69134	0.725582	0.379703	0.341312	0.363538	5.97112	4.10279	3.98359	0.176218	0.131893	0.139782	0.0761835	0.744919	0.779369	0.858443	0.141153	0.0240642	1	0.753779	0.229591	0.333333	0.333333	0.333333		0.916912	0.389631	0.124374	0.0698535	0.290244	0.0969328	-0.666667	-0.666667	-0.666667
194	6.57005	6.57205	6.47293				279	279	279			0.415644	0.412293	0.36392	0.169713	0.168887	0.150371	5.99808	5.95962	5.85714	0.0632634	0.0627343	0.0562218	0.0195738	0.0901718	0.171083	0.995514	0.903589	0.420943	1	0.917554	0.461708	1	1	0.666667		0.976244	0.828917	0.373972	0.0191089	0.074745	0.0639805	0	0	-0.333333
195	6.41171	6.41097	6.45468				279	279	279			0.427566	0.453768	0.462045	0.17464	0.190399	0.20182	5.99401	5.67986	5.24129	0.0666852	0.07078	0.0715829	0.0346177	0.260073	0.416781	0.98321	0.788657	0.305296	1	0.864804	0.335016	0.333333	0.333333	0.333333		0.95985	0.662894	0.223677	0.0332278	0.1724	0.0932243	-0.666667	-0.666667	-0.666667
196	6.5942	6.58772	6.55617				279	279	279			0.672948	0.669789	0.6482	0.274745	0.273586	0.268529	5.99936	5.9936	5.82688	0.102052	0.101672	0.0988686	0.0112707	0.0357979	0.188822	0.973793	0.880642	0.403876	1	0.955585	0.587607	0.666667	0.666667	0.666667		0.981045	0.902206	0.450176	0.0110571	0.0322971	0.085003	-0.333333	-0.333333	-0.333333
198	7.50011	7.40354	7.13303				279	279	279			0.519686	0.55312	0.519713	0.212401	0.238508	0.295425	5.98647	5.37815	3.0948	0.0692905	0.0747102	0.0728601	0.0520712	0.372491	1.06136	1	0.977215	0.806783	0.869266	0.39292	0.126947	0	0	0		0.904783	0.558319	0.255065	0.0471132	0.207968	0.270715	1	1	1
199	5.25407	5.17387	4.90583				279	279	279			0.915265	0.618361	0.578129	0.375333	0.310834	0.388291	5.94648	3.95756	2.21684	0.174201	0.119516	0.117845	0.103921	0.786957	1.43104	0.785651	0.113813	0.0128442	1	1	1	0.333333	0.333333	0		0.871955	0.492586	0.26267	0.0906142	0.387644	0.375891	-0.666667	-0.666667	-1
201	6.59758	6.59962	6.60095				279	279	279			0.673768	0.672097	0.66075	0.27507	0.274466	0.27093	5.99976	5.99636	5.94787	0.102124	0.101839	0.100099	0.00698466	0.0269872	0.102551	0.991851	0.885458	0.420783	1	0.911293	0.473833	0.666667	0.666667	0.666667		0.989666	0.877326	0.407414	0.00691248	0.0236766	0.0417807	-0.333333	-0.333333	-0.333333
205	6.56436	6.56129	6.71705				279	279	279			0.41866	0.407619	0.459643	0.170945	0.167449	0.191515	5.99802	5.92571	5.76018	0.0637777	0.0621247	0.0684293	0.0199156	0.122653	0.223521	0.994875	0.792365	0.262743	1	0.813556	0.355928	1	1	1		0.97796	0.715808	0.25918	0.0194767	0.0877959	0.0579319	0	0	0
214	4.88282	4.28942	4.07223				279	279	279			0.623731	0.81506	0.681636	0.256419	0.612633	0.619296	5.91691	1.77002	1.21146	0.12774	0.190017	0.167386	0.12981	1.69344	2.1779	0.710394	0.0254639	0.0103937	1	1	1	0	0	0		0.792537	0.224731	0.183663	0.102879	0.380569	0.400001	-1	-1	-1
216	6.85792	6.90597	6.86843				279	279	279			0.393946	0.400068	0.399692	0.160855	0.168064	0.166331	5.99794	5.66654	5.77436	0.0574439	0.0579308	0.0581926	0.0203192	0.265737	0.216544	1	0.468493	0.152238	0.959227	0.291837	0.104665	0.666667	0.666667	0.666667		0.962665	0.309325	0.10674	0.0195606	0.0821989	0.0231139	0.333333	0.333333	0.333333
225	6.52837	6.42858	5.96022				279	279	279			0.890681	0.940996	1.29386	0.364037	0.39199	0.749987	5.98624	5.7627	2.97624	0.136432	0.146377	0.217083	0.0525267	0.222292	1.10416	0.887275	0.647428	0.161282	1	1	1	0.666667	0.666667	1		0.908602	0.717322	0.308957	0.0477259	0.159455	0.341137	-0.333333	-0.333333	0
233	7.0909	7.07909	6.95735				279	279	279			0.254261	0.252445	0.277179	0.103821	0.103534	0.117639	5.99782	5.94519	5.55164	0.0358575	0.0356607	0.0398397	0.0208776	0.105177	0.311312	1	0.95611	0.583147	0.929527	0.637987	0.266968	0	0	0.333333		0.969081	0.834959	0.383552	0.0202321	0.0878185	0.119404	1	1	0.666667
234	6.18958	6.24756	6.35407				279	279	279			1.47236	1.26991	0.9633	0.602379	0.573619	0.504964	5.9743	4.90118	3.63917	0.237877	0.203265	0.151604	0.071843	0.518685	0.882313	0.968492	0.860696	0.493874	1	0.966296	0.654763	1	1	1		0.923641	0.621464	0.293496	0.0663571	0.322344	0.258955	0	0	0
236	6.67876	6.69644	6.77596				279	279	279			0.387799	0.394479	0.408723	0.158367	0.162501	0.180087	5.99628	5.89301	5.15101	0.0580645	0.0589088	0.0603195	0.0273009	0.147602	0.444728	1	0.963785	0.66391	0.946455	0.748505	0.286465	1	1	1		0.948182	0.745978	0.355898	0.0258862	0.110108	0.158278	0	0	0
238	6.52511	6.54559	6.57149				279	279	279			0.386581	0.379727	0.360754	0.157875	0.156129	0.159051	5.99585	5.91528	5.14455	0.0592451	0.0580127	0.0548968	0.0288102	0.131096	0.446699	0.98257	0.918127	0.471762	1	0.96425	0.689235	0.666667	0.666667	0.666667		0.960808	0.827139	0.387805	0.0276811	0.108435	0.173232	-0.333333	-0.333333	-0.333333
247	6.68269	6.67576	6.64404				279	279	279			0.354427	0.357969	0.373933	0.144726	0.146556	0.158271	5.99733	5.96599	5.58194	0.0530366	0.0536223	0.056281	0.0231032	0.0827069	0.299791	0.98565	0.94204	0.478109	1	0.973625	0.625941	1	1	1		0.966887	0.875522	0.408657	0.0223382	0.0724117	0.122512	0	0	0
251	7.22387	7.2328	7.25845				279	279	279			0.45217	0.448572	0.435082	0.184604	0.18322	0.178822	5.99962	5.99403	5.91972	0.0625939	0.0620192	0.0599414	0.00873573	0.0345733	0.127568	1	0.935105	0.530955	0.978172	0.855862	0.393118	0.333333	0.333333	0.333333		0.992795	0.910125	0.468083	0.00867278	0.0314661	0.0597123	0.666667	0.666667	0.666667
259	6.55799	6.343	6.23375				279	279	279			0.867805	0.959911	1.26162	0.354454	0.414465	0.608515	5.99411	5.36398	4.29851	0.132328	0.151334	0.202386	0.0343456	0.37721	0.689202	0.935882	0.381632	0.0874865	1	0.710765	0.265095	0.666667	0.666667	1		0.943254	0.424393	0.111724	0.0323966	0.160086	0.0770005	-0.333333	-0.333333	0
264	6.92096	6.95621	7.32904				279	279	279			0.751839	0.737408	0.283507	0.306977	0.303115	0.116771	5.99842	5.91833	5.89462	0.108632	0.106007	0.0386827	0.017752	0.128684	0.146468	1	0.808956	0.361037	0.961423	0.618482	0.209071	0.666667	0.666667	0		0.971344	0.667985	0.291459	0.0172433	0.0859587	0.0426893	0.333333	0.333333	1
265	5.69466	5.37633	5.16355				279	279	279			0.87641	0.751992	0.776269	0.358342	0.355601	0.398305	5.98163	4.47199	3.79832	0.1539	0.139871	0.150336	0.060712	0.64033	0.834011	0.896041	0.168449	0.0245756	1	0.600408	0.208299	0.666667	0.666667	0.333333		0.935211	0.335135	0.088392	0.0567786	0.214597	0.0737198	-0.333333	-0.333333	-0.666667
275	7.49413	7.47079	7.4135				279	279	279			0.593141	0.591878	0.569464	0.242181	0.243209	0.242662	5.99841	5.92253	5.50716	0.0791475	0.0792257	0.0768144	0.0178137	0.125288	0.327702	1	0.815637	0.344438	0.983869	0.736963	0.239945	0.333333	0.333333	0.333333		0.980367	0.716681	0.233353	0.0174639	0.0897918	0.0764704	0.666667	0.666667	0.666667
299	4.00763	4.3341	4.2976				279	279	279			0.941219	0.576969	0.785734	0.390229	0.506918	0.694294	5.81758	1.29547	1.28075	0.234857	0.133123	0.182831	0.193981	2.08754	2.10279	0.386636	4.09822e-12	3.25112e-07	1	0.776181	0.360517	0	0	0		0.778802	0.14802	0.0682536	0.151073	0.308997	0.143523	-1	-1	-1
301	3.99139	4.23209	4.22858				279	279	279			0.956249	0.950921	1.16613	0.397379	0.786453	1.0576	5.79072	1.46199	1.21577	0.239578	0.224693	0.275773	0.20825	1.92997	2.17306	0.3614	2.13376e-12	2.20138e-07	1	0.975348	0.730646	0	0	0		0.767725	0.198326	0.134594	0.159879	0.382764	0.292482	-1	-1	-1
302	3.95279	4.4119	4.28939				279	279	279			0.913035	0.343281	0.739511	0.375786	0.239546	0.540158	5.9033	2.05363	1.87434	0.230985	0.077808	0.172405	0.140202	1.51855	1.62523	0.430074	1.94489e-12	4.12542e-07	1	0.141144	0.0667042	0	0	0		0.857193	0.0363095	0.0156647	0.12018	0.0551376	0.0254586	-1	-1	-1
305	6.2698	6.26601	6.34378				279	279	279			0.390346	0.390961	0.486132	0.159363	0.159695	0.20003	5.99962	5.99355	5.90634	0.0622581	0.0623939	0.0766313	0.00870375	0.0359412	0.137942	0.980039	0.869086	0.453212	1	0.941331	0.591919	0.333333	0.333333	0.333333		0.986486	0.893222	0.465395	0.00858613	0.0321034	0.0641976	-0.666667	-0.666667	-0.666667
311	4.12507	4.6114	4.81586				279	279	279			0.630945	0.71306	0.716575	0.258359	0.4041	0.494321	5.964	3.11367	2.10138	0.152954	0.15463	0.148795	0.0851055	1.05469	1.49208	0.699218	0.00416776	0.00279952	1	0.62804	0.215995	0	0	0		0.879512	0.219449	0.0543312	0.0748514	0.231452	0.0810667	-1	-1	-1
313	7.22552	7.23387	7.28468				279	279	279			0.451909	0.448479	0.436095	0.184513	0.183245	0.182008	5.99857	5.98988	5.74091	0.0625435	0.0619972	0.0598647	0.0168861	0.0450333	0.232714	1	0.997512	0.888495	0.94943	0.870804	0.45065	0.333333	0.333333	0.333333		0.974549	0.948173	0.634372	0.0164563	0.0426993	0.147627	0.666667	0.666667	0.666667
317	4.16103	4.39418	4.35384				279	279	279			0.372001	0.229409	0.281536	0.152631	0.136729	0.160298	5.94021	2.81512	3.08468	0.0894012	0.0522074	0.0646638	0.109901	1.16517	1.06495	0.545726	5.01698e-06	8.32742e-06	1	0.342786	0.0897144	0	0	0		0.878778	0.118534	0.0318805	0.0965787	0.138113	0.0339511	-1	-1	-1
323	8.29369	8.29695	8.28779				279	279	279			0.0885201	0.0900179	0.09505	0.0361521	0.0373465	0.0410614	5.99539	5.80977	5.35843	0.0106732	0.0108495	0.0114687	0.030377	0.198223	0.379048	1	0.849684	0.394778	0.854659	0.199893	0.0297651	0	0	0		0.974109	0.727306	0.27071	0.0295905	0.144169	0.102612	1	1	1
328	8.06665	8.14637	8.19214				279	279	279			0.61209	0.531434	0.471979	0.250163	0.231889	0.222032	5.98665	5.25218	4.51869	0.0758791	0.0652357	0.0576136	0.0517322	0.41335	0.627201	1	0.933827	0.491442	0.85008	0.252815	0.0557205	0	0	0		0.912844	0.531588	0.228829	0.0472234	0.219732	0.143522	1	1	1
334	7.80379	7.91779	8.15409				279	279	279			0.802552	0.759716	0.582242	0.328107	0.330483	0.311368	5.98296	5.28449	3.49671	0.102841	0.0959506	0.0714049	0.0584631	0.403084	0.926863	1	0.990463	0.807316	0.831851	0.270716	0.066391	0	0	0		0.894988	0.54918	0.283424	0.0523238	0.221366	0.262696	1	1	1
336	3.82528	3.71454	3.78434				279	279	279			0.422536	0.173508	0.24051	0.172623	0.0992902	0.122539	5.99146	3.05369	3.85229	0.110459	0.0467104	0.0635541	0.0413626	1.07601	0.817935	0.789563	9.2979e-07	0.000121243	1	0.00275688	0.00350778	0	0	0		0.948354	0.000937335	0.00161803	0.0392264	0.00100859	0.00132344	-1	-1	-1
341	6.7961	6.79851	6.81504				279	279	279			0.309694	0.317744	0.335966	0.126438	0.130018	0.143161	5.99943	5.97237	5.50734	0.0455693	0.0467372	0.0492977	0.0106772	0.0745146	0.327638	1	0.774048	0.247074	0.996604	0.757858	0.41461	1	1	0.666667		0.985814	0.703947	0.267033	0.0105258	0.0524543	0.0874903	0	0	-0.333333
342	7.87945	7.84127	7.87096				279	279	279			0.543861	0.558633	0.596369	0.222037	0.229961	0.270153	5.99964	5.90126	4.87316	0.0690227	0.0712427	0.0757683	0.00847635	0.141701	0.526765	1	0.112584	0.106942	0.974447	0.0725115	0.0138432	0	0	0		0.990183	0.0961701	0.0530556	0.00839313	0.0136274	0.0279478	1	1	1
343	4.04699	3.80889	3.73872				279	279	279			0.593073	0.373906	0.220422	0.243068	0.185146	0.125448	5.95331	4.07846	3.0873	0.146547	0.0981665	0.0589565	0.0970089	0.751911	1.06402	0.651546	0.00234639	0.000673017	1	0.979215	0.649768	0	0	0		0.890879	0.510031	0.254407	0.0864232	0.383498	0.270693	-1	-1	-1
352	4.31534	4.25879	4.62362				279	279	279			0.573326	0.651515	0.631363	0.234217	0.29816	0.298476	5.99194	4.77474	4.47445	0.132858	0.152981	0.136552	0.0401744	0.55492	0.639637	0.800639	0.00456241	0.00592146	1	0.153828	0.0484121	0	0	0		0.947945	0.0817078	0.0253917	0.0380832	0.0453413	0.0162415	-1	-1	-1
353	6.79671	6.80278	6.73588				279	279	279			0.308664	0.310539	0.342206	0.126016	0.126968	0.141933	5.99961	5.98197	5.81316	0.0454137	0.0456489	0.0508035	0.00884125	0.0601342	0.196391	0.998433	0.763779	0.319769	1	0.771235	0.346163	1	1	1		0.989834	0.721242	0.292013	0.00875137	0.0433713	0.0573488	0	0	0
361	7.07276	7.08682	7.04933				279	279	279			0.633512	0.62132	0.547917	0.258713	0.255499	0.234921	5.99617	5.9136	5.43984	0.0895707	0.0876725	0.0777262	0.0276922	0.132411	0.351522	1	0.96693	0.665692	0.933468	0.691895	0.283399	0.333333	0.333333	0.333333		0.965389	0.835527	0.414887	0.0267338	0.110633	0.145842	0.666667	0.666667	0.666667
362	4.08978	4.14732	4.52141				279	279	279			0.613362	0.653112	0.797551	0.250505	0.279111	0.442113	5.99516	5.47545	3.25425	0.149974	0.157478	0.176394	0.0311324	0.33906	1.00623	0.73667	0.00263643	0.00286084	1	0.325314	0.177633	0	0	0		0.968159	0.231337	0.0599825	0.0301411	0.078437	0.0603559	-1	-1	-1
364	6.84776	6.85007	6.8448				279	279	279			0.597597	0.580604	0.344538	0.243987	0.238028	0.142433	5.99906	5.94983	5.8513	0.087269	0.0847589	0.0503357	0.0136915	0.10059	0.174628	0.998668	0.748253	0.189144	1	0.754695	0.258545	0.666667	0.666667	1		0.984669	0.677666	0.20671	0.0134816	0.0681662	0.0360974	-0.333333	-0.333333	0
369	7.2552	7.04859	7.07039				279	279	279			0.858732	0.747101	0.845772	0.351653	0.458091	0.593924	5.96328	2.65983	2.02789	0.118361	0.105993	0.119622	0.0859607	1.22757	1.53313	1	0.891802	0.417957	0.818041	0.105748	0.0137657	0.333333	0.333333	0.333333		0.85532	0.257019	0.101975	0.0735239	0.31551	0.156342	0.666667	0.666667	0.666667
370	7.6321	7.63465	7.19312				279	279	279			0.663223	0.602849	0.468761	0.270844	0.262722	0.194362	5.99627	5.26533	5.81673	0.0868991	0.0789623	0.0651679	0.027331	0.409188	0.194447	1	0.20391	0.0318484	0.932077	0.0741958	0.0229562	0	0	0.333333		0.963523	0.128364	0.0230992	0.026334	0.052525	0.00449157	1	1	0.666667
372	5.71643	5.45416	5.57749				279	279	279			1.28745	1.18779	1.58162	0.526005	0.511192	0.702774	5.99071	5.39902	5.0649	0.225218	0.217778	0.283571	0.0431276	0.36548	0.47069	0.897299	0.300017	0.0949755	1	0.741405	0.22042	0.333333	0.333333	0.666667		0.938974	0.473785	0.13599	0.0404957	0.173159	0.0640093	-0.666667	-0.666667	-0.333333
383	8.29321	8.29292	8.31049				279	279	279			0.0892548	0.0931871	0.102441	0.0364521	0.0384048	0.0454052	5.99541	5.88761	5.09021	0.0107624	0.0112369	0.0123267	0.0303041	0.151348	0.463119	1	0.967719	0.705077	0.853781	0.308475	0.0834735	0	0	0		0.956112	0.801191	0.392989	0.0289741	0.121259	0.182001	1	1	1
389	6.68667	6.72511	6.89833				279	279	279			0.929577	0.893661	0.733332	0.379829	0.371723	0.354549	5.98954	5.77971	4.27809	0.139019	0.132884	0.106306	0.0457708	0.213864	0.694976	1	1	1	0.919494	0.735774	0.309222	0.666667	0.666667	0.666667		0.938001	0.789897	0.468633	0.0429331	0.16893	0.325689	0.333333	0.333333	0.333333
390	7.43061	7.4355	7.49455				279	279	279			0.929033	0.926304	0.917218	0.379284	0.37832	0.378453	5.99974	5.995	5.87381	0.125028	0.124579	0.122385	0.00725387	0.0316322	0.160562	1	0.919125	0.461885	0.987756	0.872912	0.376516	0.333333	0.333333	0.333333		0.992724	0.891494	0.399087	0.00720109	0.0281999	0.0640781	0.666667	0.666667	0.666667
397	7.33331	7.32782	7.11829				279	279	279			0.85848	0.855398	0.585758	0.350481	0.349309	0.241608	5.99975	5.99677	5.87777	0.117066	0.116733	0.0822891	0.00711974	0.02542	0.157972	1	0.954441	0.640697	0.989018	0.921121	0.461943	0.333333	0.333333	0.333333		0.987838	0.915745	0.48868	0.00703314	0.0232782	0.0771978	0.666667	0.666667	0.666667
399	6.92309	6.89275	6.88807				279	279	279			0.727019	0.702684	0.720031	0.296838	0.28792	0.300214	5.99862	5.95628	5.75228	0.105014	0.101945	0.104533	0.0166246	0.0938534	0.227325	1	0.898267	0.443326	0.987453	0.84832	0.388412	1	1	1		0.976581	0.795534	0.329642	0.0162353	0.0746636	0.0749357	0	0	0
404	5.85895	5.6819	5.69228				279	279	279			1.03431	1.0605	1.06138	0.423301	0.736405	0.723982	5.97045	2.07392	2.14926	0.176536	0.186646	0.18646	0.0770702	1.50721	1.46628	0.945379	0.0895086	0.0377018	1	0.229136	0.0866523	0.333333	0.333333	0.333333		0.888017	0.0592174	0.0231621	0.0684397	0.0892532	0.0339623	-0.666667	-0.666667	-0.666667
407	8.147	8.15831	8.05546				279	279	279			0.522411	0.485583	0.462605	0.213376	0.209156	0.203944	5.99427	5.38996	5.14516	0.0641232	0.0595201	0.0574275	0.0338764	0.368535	0.446511	1	0.687864	0.244095	0.865278	0.131045	0.0492273	0	0	0		0.944186	0.414384	0.136965	0.0319856	0.152715	0.0611562	1	1	1
414	7.29955	7.30014	7.41401				279	279	279			0.899012	0.906187	0.912359	0.367025	0.370057	0.379109	5.99985	5.99651	5.79168	0.12316	0.124133	0.123059	0.00544685	0.0264319	0.207757	0.997618	0.878934	0.456257	1	0.888292	0.372245	0.333333	0.333333	0.333333		0.992886	0.858897	0.335519	0.00540811	0.0227023	0.0697064	-0.666667	-0.666667	0.666667
418	5.77922	5.41836	5.56037				279	279	279			1.00503	0.71194	0.639074	0.412	0.381116	0.396999	5.9506	3.48958	2.59134	0.173904	0.131394	0.114934	0.0998111	0.929132	1.25638	0.800243	0.0878476	0.0322832	1	0.913514	0.430289	0.666667	0.666667	0.333333		0.872903	0.372027	0.123773	0.0871255	0.345662	0.155506	-0.333333	-0.333333	-0.666667
419	7.00267	7.00185	6.98978				279	279	279			0.218884	0.218667	0.213224	0.0893651	0.0893567	0.089028	5.99919	5.98844	5.73611	0.0312572	0.0312299	0.0305051	0.0127501	0.0481398	0.234958	1	0.965665	0.688674	0.954718	0.794252	0.346541	0	0	0		0.982002	0.907964	0.47915	0.0125206	0.0437092	0.11258	1	1	1
420	7.64887	8.02298	8.08019				279	279	279			0.727948	0.647473	0.626643	0.298437	0.355534	0.350305	5.94968	3.3165	3.19998	0.0951707	0.0807023	0.0775529	0.100738	0.985374	1.0247	1	0.830915	0.423024	0.782182	0.0310451	0.0131994	0	0	0		0.887349	0.352095	0.174486	0.08939	0.346945	0.178796	1	1	1
426	7.24787	7.28019	7.16991				279	279	279			1.03543	1.0882	1.08919	0.423325	0.501495	0.481626	5.98266	4.70849	5.11432	0.14286	0.149474	0.151911	0.0589831	0.57372	0.455863	1	0.11738	0.0185244	0.964742	0.0622623	0.0140184	0.666667	0.666667	0.666667		0.954046	0.0669619	0.0115746	0.0562726	0.0384174	0.00527644	0.333333	0.333333	0.333333
427	7.6497	8.12045	8.16895				279	279	279			0.729637	0.642095	0.615516	0.298525	0.35359	0.350276	5.9738	3.29761	3.08787	0.0953811	0.0790713	0.0753482	0.0725437	0.991667	1.06382	1	0.566007	0.0919397	0.78439	0.0167583	0.00420115	0	0	0		0.893893	0.196891	0.0305144	0.0648463	0.195251	0.0324618	1	1	1
428	7.05445	5.95507	5.83186				279	279	279			0.986813	1.43223	1.22604	0.406774	1.29311	1.1785	5.88524	1.22675	1.0823	0.139885	0.240506	0.210231	0.15297	2.16083	2.33506	0.765332	0.0461855	0.0141223	1	1	1	0.666667	0.666667	1		0.770871	0.184945	0.173426	0.11792	0.399634	0.404961	-0.333333	-0.333333	0
435	5.43554	5.34403	5.27467				279	279	279			0.822807	0.710098	0.478977	0.335982	0.300429	0.20834	5.99739	5.58668	5.28545	0.151375	0.132877	0.090807	0.0228554	0.29796	0.402779	0.932678	0.195395	0.0240063	1	0.469199	0.108107	0.333333	0.333333	0		0.962265	0.305109	0.0676975	0.0219929	0.0909105	0.0272672	-0.666667	-0.666667	-1
Q2f1=	0.740114	0.720458	0.679068
Q2f2=	0.739941	0.720272	0.678854
RMSEP=	0.618676	0.641646	0.68751
MAE=	0.480218	0.49079	0.536368
Compounds	<2	signifies	only	one or zero	compounds	in the	Threshold	value

## Sheet: Table S7
Table S7. The detailed results of the q-RASAR model.
No.	Status	Experimental pIC50	Predicted pIC50	Predicted Residuals	HAT i/i (h*=0.0430)	Std.Pred.Mod.Eq. Res.	Std.Pred.LOO Res.
1	Training	4.658	6.1443	1.4863	0.0111	1.9252	1.9468
2	Training	7.398	7.1557	-0.2423	0.0062	-0.313	-0.315
5	Prediction	7.62	7.7482	0.1282	0.0156	0.1664	0.1664
6	Prediction	6.939	6.5236	-0.4154	0.0088	-0.5374	-0.5374
8	Training	6.367	6.5244	0.1574	0.0088	0.2036	0.2054
9	Training	7.699	7.0829	-0.6161	0.0089	-0.7971	-0.8043
10	Training	6.824	7.2618	0.4378	0.007	0.5659	0.5698
13	Training	4.237	5.8591	1.6221	0.0086	2.0983	2.1165
15	Training	5.046	6.8662	1.8202	0.0059	2.3514	2.3654
16	Prediction	5	5.6869	0.6869	0.0098	0.8891	0.8891
17	Prediction	6.187	6.323	0.136	0.0053	0.1756	0.1756
18	Training	7.523	7.4836	-0.0394	0.0085	-0.051	-0.0514
21	Training	7.046	7.1171	0.0711	0.0121	0.0921	0.0933
24	Training	6.602	6.8077	0.2057	0.0109	0.2664	0.2694
33	Training	7.125	7.1921	0.0671	0.0067	0.0868	0.0873
34	Training	6.638	6.1783	-0.4597	0.0082	-0.5946	-0.5995
37	Training	7.155	7.0194	-0.1356	0.0063	-0.1752	-0.1763
39	Training	7.456	7.0787	-0.3773	0.0069	-0.4877	-0.4911
40	Training	6.398	5.9067	-0.4913	0.0082	-0.6355	-0.6407
41	Training	6.125	6.7444	0.6194	0.0199	0.8058	0.8222
42	Training	8.347	7.752	-0.595	0.0129	-0.7714	-0.7815
43	Training	7.097	6.6209	-0.4761	0.0051	-0.6148	-0.618
44	Training	6.638	6.5747	-0.0633	0.0089	-0.0819	-0.0826
45	Training	7.699	7.3076	-0.3914	0.0085	-0.5063	-0.5107
46	Prediction	8.222	6.607	-1.615	0.009	-2.0896	-2.0896
47	Prediction	6.456	5.959	-0.497	0.0146	-0.6449	-0.6449
48	Training	7.481	7.6509	0.1699	0.0223	0.2213	0.2263
49	Training	6.456	6.609	0.153	0.0041	0.1975	0.1983
50	Training	6.886	7.008	0.122	0.0112	0.1581	0.1598
51	Prediction	6.26	6.0644	-0.1956	0.0111	-0.2534	-0.2534
52	Training	6.046	6.6827	0.6367	0.0048	0.8221	0.826
53	Training	8.469	7.6612	-0.8078	0.0145	-1.0481	-1.0635
54	Training	8.398	7.7061	-0.6919	0.0124	-0.8968	-0.908
55	Training	5.854	6.6074	0.7534	0.009	0.9749	0.9837
56	Prediction	8.301	7.7298	-0.5712	0.0154	-0.7415	-0.7415
57	Training	5.222	6.565	1.343	0.0052	1.7344	1.7435
58	Training	6.648	6.2937	-0.3543	0.0101	-0.4587	-0.4633
59	Prediction	7.523	6.5985	-0.9245	0.0051	-1.1939	-1.1939
60	Training	6.62	7.5249	0.9049	0.0084	1.1704	1.1803
61	Training	7.602	7.8955	0.2935	0.0127	0.3805	0.3854
62	Training	7.347	7.3149	-0.0321	0.0072	-0.0416	-0.0419
63	Training	7.056	6.6238	-0.4322	0.0051	-0.5582	-0.561
64	Training	5.721	5.3018	-0.4192	0.0117	-0.5432	-0.5496
65	Training	6.523	5.5116	-1.0114	0.0098	-1.3092	-1.3221
66	Training	4.553	5.1036	0.5506	0.0145	0.7144	0.7249
67	Training	7.523	7.4224	-0.1006	0.0118	-0.1303	-0.1319
69	Training	7.699	6.4843	-1.2147	0.0067	-1.5698	-1.5805
70	Training	5.237	5.4533	0.2163	0.011	0.2802	0.2833
71	Training	8.097	7.6814	-0.4156	0.0147	-0.5393	-0.5474
72	Training	6.614	7.5327	0.9187	0.0084	1.1883	1.1984
73	Training	7.783	6.6217	-1.1613	0.0091	-1.5027	-1.5165
74	Training	7.757	6.3141	-1.4429	0.0058	-1.8639	-1.8749
75	Training	6.77	5.6286	-1.1414	0.0089	-1.4768	-1.4901
76	Training	6.097	6.6289	0.5319	0.0067	0.6874	0.6921
77	Training	5.301	5.9738	0.6728	0.0087	0.8704	0.878
78	Training	5.398	6.5632	1.1652	0.0089	1.5076	1.5211
79	Training	5.638	6.8891	1.2511	0.0062	1.6164	1.6264
80	Prediction	6.398	5.8685	-0.5295	0.009	-0.6851	-0.6851
81	Training	6.301	6.7269	0.4259	0.0041	0.5497	0.5519
82	Prediction	7.143	7.5786	0.4356	0.0135	0.5649	0.5649
83	Training	8	7.2429	-0.7571	0.0067	-0.9784	-0.985
84	Training	8.046	6.7155	-1.3305	0.0048	-1.7178	-1.7261
85	Training	7.347	6.8534	-0.4936	0.0051	-0.6374	-0.6406
86	Training	8.187	6.7628	-1.4242	0.0072	-1.841	-1.8543
87	Prediction	7.959	7.3951	-0.5639	0.0078	-0.7291	-0.7291
88	Training	8.222	7.3725	-0.8495	0.0076	-1.0983	-1.1067
89	Training	7.602	7.9455	0.3435	0.0134	0.4454	0.4514
90	Training	8.553	7.5782	-0.9748	0.0135	-1.2642	-1.2815
91	Training	7.824	7.6154	-0.2086	0.0113	-0.2703	-0.2734
92	Training	6.699	6.7179	0.0189	0.0095	0.0244	0.0246
93	Training	6.602	6.9035	0.3015	0.0105	0.3904	0.3946
94	Prediction	7.398	7.1865	-0.2115	0.0064	-0.2733	-0.2733
95	Training	5.097	6.5527	1.4557	0.0065	1.8811	1.8935
96	Training	6.481	6.7062	0.2252	0.0048	0.2907	0.2921
97	Prediction	7.699	6.976	-0.723	0.0082	-0.9351	-0.9351
98	Training	8.155	7.6457	-0.5093	0.01	-0.6593	-0.6659
99	Training	8	7.4785	-0.5215	0.0099	-0.6751	-0.6819
100	Training	7.699	7.0254	-0.6736	0.0066	-0.8704	-0.8762
101	Training	7.745	7.0729	-0.6721	0.0069	-0.8687	-0.8748
102	Training	6.658	7.8255	1.1675	0.0596	1.5507	1.649
103	Training	6.495	7.1205	0.6255	0.0564	0.8293	0.8789
104	Training	8.187	6.8418	-1.3452	0.005	-1.7371	-1.7459
105	Prediction	6.824	7.3735	0.5495	0.0075	0.7105	0.7105
106	Prediction	6.638	6.6063	-0.0317	0.0064	-0.0409	-0.0409
107	Training	8.319	8.0435	-0.2755	0.0147	-0.3575	-0.3628
108	Training	4.125	4.8343	0.7093	0.0196	0.9227	0.9411
109	Prediction	7.444	6.9019	-0.5421	0.0105	-0.702	-0.702
110	Training	7.745	7.131	-0.614	0.0092	-0.7946	-0.802
111	Training	4.854	5.3736	0.5196	0.011	0.673	0.6805
112	Training	8.553	7.3118	-1.2412	0.0072	-1.6044	-1.616
113	Training	5.097	5.8265	0.7295	0.0077	0.9433	0.9507
114	Prediction	5.854	5.7147	-0.1393	0.0084	-0.1802	-0.1802
115	Training	7.155	6.2652	-0.8898	0.0149	-1.1548	-1.1723
116	Training	7.658	6.9807	-0.6773	0.0054	-0.8747	-0.8795
117	Prediction	8.022	7.085	-0.937	0.0089	-1.2123	-1.2123
118	Training	8.046	6.7776	-1.2684	0.0072	-1.6397	-1.6516
119	Training	7.602	7.7626	0.1606	0.0774	0.2154	0.2334
120	Training	6.301	7.1846	0.8836	0.0064	1.1418	1.1491
121	Prediction	6.62	6.7645	0.1445	0.0103	0.1871	0.1871
122	Prediction	6.699	7.3488	0.6498	0.0142	0.8431	0.8431
124	Prediction	7.097	6.6899	-0.4071	0.0048	-0.5256	-0.5256
125	Training	6.824	7.2994	0.4754	0.0071	0.6145	0.6189
126	Prediction	7.347	7.4744	0.1274	0.0084	0.1648	0.1648
127	Training	7.301	6.9457	-0.3553	0.0044	-0.4586	-0.4606
128	Training	6.602	6.8285	0.2265	0.005	0.2924	0.2939
129	Training	6.939	6.5418	-0.3972	0.0048	-0.5129	-0.5153
130	Training	6.553	6.7228	0.1698	0.0048	0.2192	0.2202
131	Prediction	5.921	6.3405	0.4195	0.0278	0.548	0.548
132	Training	6.824	6.4927	-0.3313	0.0048	-0.4277	-0.4298
134	Training	8.201	7.4202	-0.7808	0.015	-1.0133	-1.0288
138	Training	6.824	7.4584	0.6344	0.0155	0.8235	0.8365
139	Training	6.125	7.0199	0.8949	0.0055	1.1558	1.1622
140	Training	7.022	6.3764	-0.6456	0.005	-0.8336	-0.8378
141	Prediction	6.824	6.9752	0.1512	0.0064	0.1953	0.1953
142	Training	4.301	6.3895	2.0885	0.0085	2.7015	2.7246
144	Prediction	6.495	7.1435	0.6485	0.0066	0.838	0.838
145	Training	6.658	6.8487	0.1907	0.0042	0.2461	0.2471
146	Training	6.569	5.771	-0.798	0.008	-1.0321	-1.0404
147	Training	5.187	6.2499	1.0629	0.0061	1.3732	1.3817
148	Training	6.824	5.68	-1.144	0.0082	-1.4796	-1.4919
151	Training	5.071	6.3663	1.2953	0.0152	1.6813	1.7073
154	Prediction	5.569	5.9396	0.3706	0.0072	0.4791	0.4791
155	Training	7.721	6.7761	-0.9449	0.0081	-1.2221	-1.2321
156	Training	7.959	6.7111	-1.2479	0.0051	-1.6114	-1.6196
157	Prediction	7.046	5.7821	-1.2639	0.0083	-1.6348	-1.6348
158	Training	4.208	5.6931	1.4851	0.0101	1.9225	1.9421
159	Training	5.585	5.3115	-0.2735	0.0117	-0.3543	-0.3585
160	Training	7.62	6.9927	-0.6273	0.0064	-0.8106	-0.8159
161	Training	7.745	6.978	-0.767	0.0064	-0.991	-0.9974
163	Training	7.824	6.7497	-1.0743	0.0051	-1.3873	-1.3944
164	Training	5.022	7.3032	2.2812	0.0071	2.9487	2.9698
165	Prediction	7.301	7.3771	0.0761	0.0076	0.0984	0.0984
166	Training	7.523	7.0115	-0.5115	0.0065	-0.6609	-0.6653
167	Training	6.26	6.9905	0.7305	0.005	0.9433	0.9481
168	Training	6.143	6.8665	0.7235	0.0042	0.9338	0.9377
169	Training	5.959	6.7558	0.7968	0.0104	1.0317	1.0425
170	Prediction	5.959	7.1523	1.1933	0.0074	1.5427	1.5427
173	Training	6.824	7.2588	0.4348	0.0081	0.5624	0.567
174	Training	6.638	7.2544	0.6164	0.0102	0.7981	0.8063
175	Training	5.638	7.0276	1.3896	0.0056	1.7949	1.8051
176	Training	6.824	6.9762	0.1522	0.0171	0.1978	0.2012
177	Training	6.921	7.1052	0.1842	0.006	0.238	0.2394
178	Prediction	6.796	7.4707	0.6747	0.0077	0.8725	0.8725
179	Training	6.523	7.0959	0.5729	0.0064	0.7403	0.7451
181	Prediction	7.125	6.6532	-0.4718	0.0041	-0.6089	-0.6089
182	Training	6.854	6.5897	-0.2643	0.0132	-0.3427	-0.3472
183	Training	6.387	6.4768	0.0898	0.0048	0.1159	0.1165
184	Prediction	6.367	6.8205	0.4535	0.0068	0.5862	0.5862
193	Prediction	6.523	5.3184	-1.2046	0.0125	-1.5615	-1.5615
194	Prediction	6.114	6.6614	0.5474	0.0063	0.7073	0.7073
195	Prediction	6.602	6.4812	-0.1208	0.012	-0.1565	-0.1565
196	Prediction	6.469	6.4573	-0.0117	0.0048	-0.0151	-0.0151
197	Training	5.979	7.5233	1.5443	0.0129	2.0021	2.0282
198	Prediction	7.469	7.3727	-0.0963	0.0076	-0.1245	-0.1245
199	Prediction	6.523	5.3081	-1.2149	0.0127	-1.5749	-1.5749
200	Training	6.796	7.1892	0.3932	0.0064	0.508	0.5113
201	Prediction	6.288	6.2212	-0.0668	0.019	-0.0869	-0.0869
202	Training	6.502	6.6466	0.1446	0.0196	0.1881	0.1919
203	Training	6.237	6.3421	0.1051	0.0062	0.1358	0.1367
204	Training	6.959	6.6563	-0.3027	0.0063	-0.3912	-0.3937
205	Prediction	6.824	6.5125	-0.3115	0.0048	-0.4022	-0.4022
206	Training	5.939	6.5068	0.5678	0.0062	0.7337	0.7382
207	Training	6.481	6.8295	0.3485	0.0061	0.4502	0.453
208	Training	5.26	6.9729	1.7129	0.005	2.2119	2.2231
209	Training	6.208	6.6018	0.3938	0.0063	0.5088	0.512
210	Training	6	6.2209	0.2209	0.019	0.2872	0.2928
211	Training	4.699	5.926	1.227	0.0101	1.5885	1.6047
214	Prediction	5.009	5.1104	0.1014	0.0204	0.132	0.132
216	Prediction	6.886	6.7824	-0.1036	0.0049	-0.1338	-0.1338
217	Training	6.796	7.0042	0.2082	0.0063	0.269	0.2707
218	Training	6.939	7.2661	0.3271	0.0069	0.4228	0.4257
219	Training	6.921	7.2613	0.3403	0.007	0.4399	0.443
220	Training	7.125	6.6743	-0.4507	0.0048	-0.5819	-0.5847
221	Training	4.638	5.634	0.996	0.0092	1.2888	1.3007
222	Training	3.991	5.1992	1.2082	0.019	1.5712	1.6016
223	Training	7.444	7.049	-0.395	0.0143	-0.5125	-0.5199
225	Prediction	7.022	6.4076	-0.6144	0.0052	-0.7934	-0.7934
227	Training	3.764	6.0734	2.3094	0.0068	2.9848	3.0052
228	Training	6.721	6.2196	-0.5014	0.0054	-0.6476	-0.6511
229	Training	7.097	6.1614	-0.9356	0.0083	-1.2102	-1.2203
230	Training	7.292	7.0674	-0.2246	0.0125	-0.2911	-0.2948
231	Training	7.377	7.3892	0.0122	0.0077	0.0158	0.016
232	Training	6.807	6.8161	0.0091	0.0061	0.0118	0.0119
233	Prediction	7.717	6.9965	-0.7205	0.0055	-0.9305	-0.9305
234	Prediction	7.319	6.4553	-0.8637	0.0125	-1.1195	-1.1195
235	Training	7.046	6.6726	-0.3734	0.0063	-0.4824	-0.4855
236	Prediction	7.071	6.4395	-0.6315	0.0132	-0.8189	-0.8189
237	Training	7.125	6.3716	-0.7534	0.0112	-0.9759	-0.9869
238	Prediction	6.301	6.6919	0.3909	0.0083	0.5056	0.5056
239	Training	6.444	6.6976	0.2536	0.0051	0.3274	0.3291
241	Training	5.556	5.2341	-0.3219	0.0136	-0.4174	-0.4232
242	Training	7.71	7.0063	-0.7037	0.0142	-0.9129	-0.926
243	Training	7.276	6.8822	-0.3938	0.0061	-0.5088	-0.512
244	Training	6.796	7.3223	0.5263	0.0072	0.6803	0.6853
245	Training	7.347	7.048	-0.299	0.0067	-0.3864	-0.389
246	Training	7.131	6.3217	-0.8093	0.0254	-1.056	-1.0834
247	Prediction	6.981	6.8259	-0.1551	0.0069	-0.2005	-0.2005
248	Training	7.585	6.7344	-0.8506	0.0345	-1.115	-1.1549
249	Training	6.569	6.9612	0.3922	0.0313	0.5132	0.5298
251	Prediction	6.585	6.9168	0.3318	0.0278	0.4335	0.4335
252	Training	7.638	6.6489	-0.9891	0.0063	-1.2781	-1.2862
253	Training	7.357	7.2925	-0.0645	0.0247	-0.0842	-0.0863
254	Training	6.268	6.3169	0.0489	0.0254	0.0638	0.0655
256	Training	7.337	7.0162	-0.3208	0.0106	-0.4154	-0.4198
257	Training	3.398	5.5947	2.1967	0.0103	2.8442	2.8739
258	Training	5.056	6.569	1.513	0.0119	1.9605	1.9841
259	Prediction	7.824	6.6503	-1.1737	0.0063	-1.5166	-1.5166
260	Training	5.523	6.741	1.218	0.0301	1.5929	1.6423
261	Training	7.907	6.7623	-1.1447	0.0066	-1.4793	-1.4891
262	Training	8.076	6.3533	-1.7227	0.0046	-2.2241	-2.2345
263	Training	6.886	7.1532	0.2672	0.0123	0.3464	0.3507
264	Prediction	6.796	6.8057	0.0097	0.0103	0.0126	0.0126
265	Prediction	7.284	5.7131	-1.5709	0.0085	-2.0321	-2.0321
266	Training	7.398	6.9067	-0.4913	0.0052	-0.6344	-0.6377
267	Training	6.796	7.1504	0.3544	0.0149	0.4599	0.4669
270	Training	6.886	6.6884	-0.1976	0.0073	-0.2555	-0.2574
271	Training	6.739	6.5264	-0.2126	0.0251	-0.2774	-0.2845
272	Training	7.041	6.5321	-0.5089	0.0052	-0.6572	-0.6606
273	Training	6.886	6.9944	0.1084	0.0055	0.14	0.1408
274	Training	7.77	7.7264	-0.0436	0.0153	-0.0566	-0.0575
275	Prediction	7.301	7.3672	0.0662	0.0076	0.0856	0.0856
276	Training	7	5.6209	-1.3791	0.011	-1.7863	-1.8062
278	Training	7.222	7.3712	0.1492	0.0111	0.1933	0.1955
279	Training	5.155	3.7945	-1.3605	0.0367	-1.7854	-1.8534
280	Training	7.097	6.539	-0.558	0.0048	-0.7205	-0.724
281	Training	6.301	6.3712	0.0702	0.005	0.0907	0.0911
282	Training	6.602	7.0428	0.4408	0.0184	0.5731	0.5839
283	Training	6.854	7.2672	0.4132	0.0091	0.5347	0.5396
284	Training	7.398	7.2799	-0.1181	0.014	-0.1532	-0.1554
286	Training	6.264	6.7373	0.4733	0.0241	0.6172	0.6324
287	Training	8.155	8.348	0.193	0.0155	0.2506	0.2545
288	Training	6.295	6.4417	0.1467	0.044	0.1933	0.2022
289	Training	7.058	6.4657	-0.5923	0.0247	-0.7725	-0.792
291	Training	6.456	6.0424	-0.4136	0.0639	-0.5506	-0.5882
292	Training	8.155	7.1797	-0.9753	0.0111	-1.2632	-1.2774
294	Training	6.398	6.2116	-0.1864	0.0055	-0.2407	-0.242
295	Training	6.824	7.1249	0.3009	0.0183	0.3911	0.3984
296	Training	6.699	7.1074	0.4084	0.006	0.5276	0.5308
297	Training	7.301	7.501	0.2	0.0086	0.2588	0.261
298	Training	7.886	6.9778	-0.9082	0.0106	-1.176	-1.1886
299	Prediction	4.022	3.8032	-0.2188	0.0374	-0.2873	-0.2873
300	Training	4.337	3.7648	-0.5722	0.0382	-0.7515	-0.7814
301	Prediction	4.222	3.7883	-0.4337	0.0377	-0.5695	-0.5695
302	Prediction	4.268	3.7528	-0.5152	0.0385	-0.6768	-0.6768
303	Training	4.569	3.8853	-0.6837	0.0354	-0.8966	-0.9296
304	Training	6.462	6.6949	0.2329	0.0257	0.3039	0.3119
305	Prediction	6.648	6.4463	-0.2017	0.0085	-0.2609	-0.2609
306	Training	6.398	6.9549	0.5569	0.0187	0.7241	0.7379
307	Training	6.301	6.6183	0.3173	0.0329	0.4156	0.4298
309	Training	7.174	5.9476	-1.2264	0.0145	-1.5913	-1.6147
310	Training	4.903	5.4257	0.5227	0.0105	0.6769	0.6841
311	Prediction	3.699	4.0548	0.3558	0.031	0.4655	0.4655
312	Training	5.939	6.3052	0.3662	0.019	0.4763	0.4855
313	Prediction	6.886	7.062	0.176	0.0241	0.2294	0.2294
314	Training	6.87	5.9305	-0.9395	0.0164	-1.2202	-1.2405
315	Training	7.377	7.5201	0.1431	0.0083	0.1851	0.1867
316	Training	7.886	8.315	0.429	0.0165	0.5572	0.5666
317	Prediction	4.155	4.016	-0.139	0.032	-0.182	-0.182
318	Training	7.022	7.2003	0.1783	0.0106	0.2308	0.2333
319	Training	4.155	4.2249	0.0699	0.0293	0.0914	0.0942
320	Training	5.561	6.58	1.019	0.0114	1.32	1.3353
321	Training	6.301	6.7752	0.4742	0.0049	0.6123	0.6154
323	Prediction	8	8.235	0.235	0.013	0.3046	0.3046
325	Training	7.301	7.5825	0.2815	0.0088	0.3642	0.3674
326	Training	8	7.1153	-0.8847	0.0052	-1.1424	-1.1484
327	Training	7.42	6.921	-0.499	0.0427	-0.6569	-0.6862
328	Prediction	8.301	8.1808	-0.1202	0.0163	-0.1561	-0.1561
329	Training	8.222	6.2642	-1.9578	0.0181	-2.5449	-2.5919
330	Training	7.244	7.4305	0.1865	0.0114	0.2416	0.2444
331	Training	8.222	8.5402	0.3182	0.022	0.4145	0.4238
332	Training	8.046	7.4093	-0.6367	0.0113	-0.8248	-0.8342
333	Training	3.721	4.0988	0.3778	0.0317	0.4945	0.5107
334	Prediction	8.398	7.9391	-0.4589	0.0141	-0.5952	-0.5952
335	Training	3.638	4.0701	0.4321	0.031	0.5654	0.5835
336	Prediction	3.125	3.7074	0.5824	0.0387	0.7651	0.7651
337	Training	8.398	8.3932	-0.0048	0.0151	-0.0062	-0.0063
339	Training	4.398	4.0536	-0.3444	0.031	-0.4506	-0.4651
340	Training	4.523	4.0363	-0.4867	0.0314	-0.637	-0.6576
341	Prediction	8.222	6.9301	-1.2919	0.0067	-1.6696	-1.6696
342	Prediction	8.097	7.9503	-0.1467	0.0276	-0.1916	-0.1916
343	Prediction	3.796	3.9112	0.1152	0.0342	0.151	0.151
344	Training	3.824	3.9552	0.1312	0.0333	0.1718	0.1777
345	Training	3.796	4.0794	0.2834	0.0308	0.3708	0.3826
346	Training	4.398	4.058	-0.34	0.0309	-0.4448	-0.459
347	Training	3.62	4.0522	0.4322	0.0325	0.566	0.585
348	Training	6.337	6.5195	0.1825	0.0341	0.2392	0.2477
349	Training	6.638	6.7663	0.1283	0.024	0.1672	0.1713
350	Training	3.699	3.8866	0.1876	0.0357	0.246	0.2552
351	Training	8.523	7.6831	-0.8399	0.0882	-1.133	-1.2426
352	Prediction	4.222	4.1579	-0.0641	0.0293	-0.0838	-0.0838
353	Prediction	7.301	6.7261	-0.5749	0.0048	-0.7423	-0.7423
354	Training	4.699	3.8069	-0.8921	0.0373	-1.1711	-1.2165
355	Training	3.886	4.5725	0.6865	0.0306	0.898	0.9264
356	Training	4.301	4.4882	0.1872	0.0325	0.2451	0.2533
357	Training	2.222	4.2225	2.0005	0.0281	2.6138	2.6895
358	Training	5.824	6.3346	0.5106	0.0132	0.662	0.6709
359	Training	7.523	7.4892	-0.0338	0.0093	-0.0438	-0.0442
360	Training	7.155	7.5714	0.4164	0.0262	0.5435	0.5581
361	Prediction	6.301	6.9799	0.6789	0.0054	0.8768	0.8768
362	Prediction	3.921	3.8787	-0.0423	0.0359	-0.0555	-0.0555
363	Training	4.469	4.1216	-0.3474	0.0313	-0.4546	-0.4693
364	Prediction	6.553	6.7384	0.1854	0.0104	0.2401	0.2401
365	Training	7.648	6.8832	-0.7648	0.007	-0.9885	-0.9955
366	Training	6.222	5.8888	-0.3332	0.0222	-0.4341	-0.4439
367	Training	6.076	7.4082	1.3322	0.0111	1.7255	1.7448
368	Training	8.398	7.878	-0.52	0.0157	-0.6751	-0.6859
369	Prediction	7.523	7.2803	-0.2427	0.0056	-0.3134	-0.3134
370	Prediction	7.638	7.7095	0.0715	0.0106	0.0926	0.0926
371	Training	6.523	6.6768	0.1538	0.0048	0.1986	0.1996
372	Prediction	5.222	5.7331	0.5111	0.0083	0.661	0.661
373	Training	7.699	7.0762	-0.6228	0.0064	-0.8048	-0.81
374	Training	8.301	7.1102	-1.1908	0.0082	-1.5401	-1.5528
375	Training	8.367	7.9088	-0.4582	0.0129	-0.594	-0.6018
376	Training	7.523	7.4024	-0.1206	0.0078	-0.156	-0.1572
377	Training	7.77	7.9962	0.2262	0.052	0.2993	0.3157
378	Training	7.081	6.4031	-0.6779	0.0064	-0.876	-0.8816
379	Training	5.377	6.4682	1.0912	0.0156	1.4166	1.4391
380	Training	6.569	7.0682	0.4992	0.0177	0.6487	0.6604
381	Training	8.328	8.0018	-0.3262	0.0173	-0.4238	-0.4313
382	Training	8.337	7.5923	-0.7447	0.0134	-0.9658	-0.9789
383	Prediction	8.328	8.0191	-0.3089	0.0146	-0.4008	-0.4008
384	Training	7.585	6.785	-0.8	0.0049	-1.033	-1.0381
385	Training	7.071	6.5423	-0.5287	0.012	-0.6852	-0.6935
386	Training	8.444	8.0411	-0.4029	0.013	-0.5224	-0.5293
387	Training	8.187	8.0639	-0.1231	0.067	-0.1642	-0.176
389	Prediction	6.854	6.4813	-0.3727	0.0065	-0.4816	-0.4816
390	Prediction	8.347	7.4525	-0.8945	0.0079	-1.1568	-1.1568
391	Training	8.328	7.0915	-1.2365	0.0234	-1.6116	-1.6502
393	Training	7.62	7.7073	0.0873	0.0188	0.1135	0.1156
394	Training	8.387	7.3064	-1.0806	0.0072	-1.3969	-1.407
395	Training	7.232	7.925	0.693	0.0164	0.9	0.9151
396	Training	7.474	7.461	-0.013	0.008	-0.0168	-0.0169
397	Prediction	7.662	7.2085	-0.4535	0.0053	-0.5857	-0.5857
398	Training	7.018	7.5691	0.5511	0.0097	0.7134	0.7204
399	Prediction	7.593	7.0231	-0.5699	0.0119	-0.7384	-0.7384
400	Training	7.349	6.8032	-0.5458	0.0115	-0.7071	-0.7153
401	Training	8.602	7.4958	-1.1062	0.0082	-1.4307	-1.4425
402	Training	8.74	7.9965	-0.7435	0.0169	-0.9658	-0.9825
403	Training	6.854	6.1707	-0.6833	0.0056	-0.8826	-0.8875
404	Prediction	5.533	5.8641	0.3311	0.0073	0.428	0.428
405	Training	6.764	7.1339	0.3699	0.0259	0.4828	0.4957
406	Training	6.62	5.8748	-0.7452	0.0136	-0.9664	-0.9797
407	Prediction	8.523	7.9565	-0.5665	0.0116	-0.7339	-0.7339
408	Training	7.658	7.4883	-0.1697	0.0093	-0.2196	-0.2216
409	Training	8.398	8.4492	0.0512	0.0213	0.0666	0.0681
410	Training	8.222	8.4342	0.2122	0.0183	0.2758	0.2809
411	Training	8.523	8.2514	-0.2716	0.0159	-0.3527	-0.3584
412	Training	8.222	7.718	-0.504	0.0152	-0.6542	-0.6643
413	Training	6.378	6.6375	0.2595	0.0428	0.3416	0.3569
414	Prediction	7.237	7.332	0.095	0.0073	0.1228	0.1228
415	Training	6.754	7.474	0.72	0.0126	0.9332	0.9451
416	Training	7.45	7.7932	0.3432	0.0104	0.4444	0.4491
417	Training	7.234	7.5025	0.2685	0.0071	0.3471	0.3496
418	Prediction	6.032	6.0781	0.0461	0.0154	0.0598	0.0598
419	Prediction	5.783	7.1918	1.4088	0.009	1.8229	1.8229
420	Prediction	8.398	7.1638	-1.2342	0.0368	-1.6197	-1.6197
421	Training	8.523	7.1863	-1.3367	0.0151	-1.7349	-1.7615
424	Training	6.921	7.199	0.278	0.0053	0.359	0.361
425	Training	6.357	7.4227	1.0657	0.0123	1.3812	1.3983
426	Prediction	7.77	7.2499	-0.5201	0.0108	-0.6736	-0.6736
427	Prediction	6.745	7.2018	0.4568	0.0795	0.6133	0.6133
428	Prediction	5.638	7.0721	1.4341	0.0106	1.857	1.857
429	Training	5.77	7.2681	1.4981	0.0108	1.9402	1.9615
430	Training	5.398	5.705	0.307	0.0085	0.3972	0.4006
431	Training	5.666	6.6948	1.0288	0.0083	1.3307	1.3419
432	Training	7.252	6.4293	-0.8227	0.0248	-1.0731	-1.1004
434	Training	6	6.2354	0.2354	0.0237	0.3068	0.3143
435	Prediction	5.328	5.8712	0.5432	0.0331	0.7115	0.7115
437	Training	4.886	6.2913	1.4053	0.0273	1.8353	1.8869
438	Training	5.18	4.5424	-0.6376	0.0476	-0.8416	-0.8837

## Sheet: Table S8
Table S8. The value of each variable in q-RASAR-Full model and the response endpoint pIC50
The modeling dataset (N=370)
No.	RA function(ED)	CATS2D_07_AL	LLS_02	pIC50	Pred. pIC50 by q-RASAR-Full model
1	6.47634	1	1	4.658	6.2093
2	7.26409	5	1	7.398	7.1968
5	8.0648	3	1	7.62	7.7959
6	6.81081	2	1	6.939	6.582
8	6.81164	2	1	6.367	6.5828
9	7.3411	3	1	7.699	7.1338
10	7.22319	7	1	6.824	7.2927
13	5.77537	6	1	4.237	5.9015
15	7.02719	4	1	5.046	6.9133
16	5.90055	2	1	5	5.7492
17	6.43632	4	1	6.187	6.3728
18	7.62072	5	1	7.523	7.523
21	7.45644	2	1	7.046	7.1727
24	6.57298	9	1	6.602	6.8313
33	7.14741	7	1	7.125	7.2234
34	6.0445	7	1	6.638	6.2144
37	6.95953	7	1	7.155	7.0515
39	7.25835	4	1	7.456	7.1248
40	5.82715	6	1	6.398	5.9488
41	7.16671	5	0.75	6.125	6.7785
42	7.99086	4	1	8.347	7.795
43	6.60411	6	1	7.097	6.6597
44	6.86639	2	1	6.638	6.6328
45	7.19492	8	1	7.699	7.3335
46	6.90151	2	1	8.222	6.665
47	6.35285	0	1	6.456	6.0296
48	8.11522	1	1	7.481	7.7087
49	6.68117	7	0.88	6.456	6.6389
50	7.33776	2	1	6.886	7.0641
51	6.38935	1	1	6.26	6.1297
52	6.74947	5	1	6.046	6.726
53	7.97018	3	1	8.469	7.7094
54	7.94089	4	1	8.398	7.7493
55	6.90199	2	1	5.854	6.6654
56	8.04482	3	1	8.301	7.7776
57	6.6996	4	1	5.222	6.6136
58	6.09194	8	1	6.648	6.3245
59	6.57972	6	1	7.523	6.6373
60	7.50939	7	1	6.62	7.5546
61	8.06887	5	1	7.602	7.933
62	7.43718	5	1	7.347	7.3551
63	6.60725	6	1	7.056	6.6625
64	5.40349	3	1	5.721	5.3612
65	5.63174	3	1	6.523	5.57
66	5.26603	2	1	4.553	5.1687
67	7.71046	3	1	7.523	7.4717
69	6.37745	7	1	7.699	6.519
70	5.41209	5	1	5.237	5.5024
71	7.99217	3	1	8.097	7.7295
72	7.51787	7	1	6.614	7.5623
73	6.91745	2	1	7.783	6.6796
74	6.27043	6	1	7.757	6.3544
75	5.75898	3	1	6.77	5.6864
76	6.84721	3	1	6.097	6.682
77	6.2127	2	1	5.301	6.0348
78	6.85391	2	1	5.398	6.6214
79	6.81773	7	1	5.638	6.9218
80	6.09815	2	1	6.398	5.93
81	6.80936	7	0.88	6.301	6.7561
82	7.88033	3	1	7.143	7.6272
83	7.35895	5	1	8	7.2835
84	6.78522	5	1	8.046	6.7587
85	6.93517	5	1	7.347	6.8958
86	6.99292	3	1	8.187	6.8153
87	7.5245	5	1	7.959	7.435
88	7.49991	5	1	8.222	7.4125
89	8.1232	5	1	7.602	7.9827
90	7.87986	3	1	8.553	7.6267
91	7.8422	4	1	7.824	7.659
92	7.02211	2	1	6.699	6.7753
93	7.22409	2	1	6.602	6.9601
94	7.29751	5	1	7.398	7.2273
95	6.45179	7	1	5.097	6.587
96	6.77502	5	1	6.481	6.7493
97	7.22479	3	1	7.699	7.0274
98	7.79707	5	1	8.155	7.6844
99	7.69331	4	1	8	7.5228
100	7.20047	4	1	7.699	7.0719
101	7.25204	4	1	7.745	7.119
102	7.19672	22	0.62	6.658	7.7686
103	6.5079	21	0.62	6.495	7.0717
104	6.92253	5	1	8.187	6.8843
105	7.34477	7	1	6.824	7.4039
106	6.51014	7	1	6.638	6.6404
107	8.22986	5	1	8.319	8.0803
108	4.73871	5	1	4.125	4.8864
109	7.22229	2	1	7.444	6.9584
110	7.39338	3	1	7.745	7.1817
111	5.48163	3	1	4.854	5.4327
112	7.43389	5	1	8.553	7.3521
113	5.97436	3	1	5.097	5.8834
114	5.85267	3	1	5.854	5.7721
115	6.68591	0	1	7.155	6.3344
116	7.07371	5	1	7.658	7.0226
117	7.34338	3	1	8.022	7.1359
118	7.009	3	1	8.046	6.83
119	6.97208	24	0.62	7.602	7.6964
120	7.29547	5	1	6.301	7.2255
121	6.87611	9	0.75	6.62	6.7794
122	7.70854	2	1	6.699	7.4033
124	6.75735	5	1	7.097	6.7332
125	7.42039	5	1	6.824	7.3398
126	7.61074	5	1	7.347	7.5139
127	7.04743	7	0.88	7.301	6.9739
128	6.90805	5	1	6.602	6.871
129	6.59619	5	1	6.939	6.5857
130	6.79306	5	1	6.553	6.7658
131	6.59689	9	0.62	5.921	6.3528
132	6.54284	5	1	6.824	6.5369
134	7.78618	2	1	8.201	7.4743
138	7.8277	2	1	6.824	7.5123
139	7.03815	6	1	6.125	7.0567
140	6.41631	5	1	7.022	6.4212
141	7.14577	4	1	6.824	7.0218
142	6.6649	2	1	4.301	6.4485
144	7.09449	7	1	6.495	7.175
145	6.94184	7	0.88	6.658	6.8773
146	5.91389	3	1	6.569	5.8281
147	6.20049	6	1	5.187	6.2904
148	5.73682	4	1	6.824	5.7328
151	6.79594	0	1	5.071	6.435
154	6.09737	3	1	5.569	5.996
155	6.61669	8	1	7.721	6.8045
156	6.70228	6	1	7.959	6.7495
157	5.93781	5	0.88	7.046	5.8254
158	5.59477	6	1	4.208	5.7362
159	5.33595	4	1	5.585	5.3661
160	7.16483	4	1	7.62	7.0393
161	7.14891	4	1	7.745	7.0247
163	6.74423	6	1	7.824	6.7878
164	7.42447	5	1	5.022	7.3435
165	7.50486	5	1	7.301	7.417
166	7.18535	4	1	7.523	7.058
167	6.93992	9	0.88	6.26	7.009
168	6.88308	8	0.88	6.143	6.8903
169	6.86669	9	0.75	5.959	6.7708
170	7.33847	4	1	5.959	7.1981
173	7.45437	4	1	6.824	7.3041
174	7.52767	3	1	6.638	7.3045
175	7.1247	5	1	5.638	7.0692
176	7.34083	6	0.75	6.824	7.0045
177	7.20915	5	1	6.921	7.1465
178	7.52864	6	1	6.796	7.5055
179	7.04271	7	1	6.523	7.1276
181	6.72921	7	0.88	7.125	6.6828
182	6.84223	7	0.75	6.854	6.615
183	6.52549	5	1	6.387	6.521
184	7.06751	5	0.88	6.367	6.8589
193	5.26528	5	1	6.523	5.3681
194	6.57005	7	1	6.114	6.6952
195	6.41171	11	0.75	6.602	6.4879
196	6.5942	6	0.88	6.469	6.4926
197	7.70156	9	0.75	5.979	7.5346
198	7.50011	5	1	7.469	7.4127
199	5.25407	5	1	6.523	5.3579
200	7.30044	5	1	6.796	7.23
201	6.59758	5	0.75	6.288	6.2578
202	7.06037	5	0.75	6.502	6.6812
203	6.54703	5	0.88	6.237	6.3828
204	6.56447	7	1	6.959	6.6901
205	6.56436	5	1	6.824	6.5566
206	6.72623	5	0.88	5.939	6.5467
207	6.7529	7	1	6.481	6.8625
208	6.92074	9	0.88	5.26	6.9914
209	6.82953	5	0.88	6.208	6.6412
210	6.59721	5	0.75	6	6.2575
211	5.77004	7	1	4.699	5.9633
214	4.88282	7	1	5.009	5.1516
216	6.85792	5	1	6.886	6.8252
217	6.94298	7	1	6.796	7.0364
218	7.38412	5	1	6.939	7.3066
219	7.22269	7	1	6.921	7.2923
220	6.74036	5	1	7.125	6.7176
221	5.60864	5	1	4.638	5.6822
222	4.97945	7	1	3.991	5.24
223	7.34185	7	0.75	7.444	7.0721
225	6.52837	4	1	7.022	6.457
227	6.24295	3	1	3.764	6.1292
228	6.24573	5	1	6.721	6.2651
229	6.02613	7	1	7.097	6.1976
230	6.78918	12	0.88	7.292	7.0711
231	7.5181	5	1	7.377	7.4291
232	6.73839	7	1	6.807	6.8492
233	7.0909	5	1	7.717	7.0383
234	6.18958	9	1	7.319	6.4805
235	6.58229	7	1	7.046	6.7064
236	6.67876	7	0.75	7.071	6.4655
237	6.44872	9	0.75	7.125	6.3884
238	6.52511	8	1	6.301	6.7208
239	6.68753	6	1	6.444	6.736
241	5.17365	5	1	5.556	5.2843
242	7.29535	7	0.75	7.71	7.0296
243	6.81023	7	1	7.276	6.9149
244	7.44523	5	1	6.796	7.3625
245	7.22506	4	1	7.347	7.0944
246	6.42018	11	0.62	7.131	6.3245
247	6.68269	10	0.88	6.981	6.8403
248	7.18169	7	0.62	7.585	6.7545
249	7.35028	8	0.62	6.569	6.9754
251	7.22387	9	0.62	6.585	6.9264
252	6.55645	7	1	7.638	6.6827
253	7.47628	11	0.62	7.357	7.2907
254	6.41499	11	0.62	6.268	6.3198
256	7.14994	9	0.75	7.337	7.0299
257	5.8003	2	1	3.398	5.6575
258	6.95012	3	0.88	5.056	6.6181
259	6.55799	7	1	7.824	6.6842
260	7.31927	3	0.75	5.523	6.7847
261	7.00419	5	0.88	7.907	6.801
262	6.40294	7	0.88	8.076	6.3843
263	6.88255	12	0.88	6.886	7.1565
264	6.92096	9	0.75	6.796	6.8205
265	5.69466	5	1	7.284	5.7609
266	6.99321	5	1	7.398	6.9489
267	7.45219	7	0.75	6.796	7.1731
270	6.53308	10	0.88	6.886	6.7034
271	6.48664	13	0.62	6.739	6.5187
272	6.50756	6	1	7.041	6.5713
273	7.08857	5	1	6.886	7.0362
274	8.04115	3	1	7.77	7.7743
275	7.49413	5	1	7.301	7.4072
276	5.52805	8	0.88	7	5.6506
278	7.37988	11	0.75	7.222	7.3737
279	3.92009	1	1	5.155	3.8707
280	6.59311	5	1	7.097	6.5829
281	6.41064	5	1	6.301	6.416
282	6.6725	11	1	6.602	7.0557
283	7.08468	11	0.88	6.854	7.2748
284	7.0085	10	1	7.398	7.2964
286	6.71613	13	0.62	6.264	6.7287
287	8.26044	11	0.88	8.155	8.3504
288	6.56261	13	0.5	6.295	6.4302
289	6.57692	11	0.62	7.058	6.4679
291	6.59694	7	0.5	6.456	6.0615
292	7.32781	9	0.75	8.155	7.1927
294	6.23704	5	1	6.398	6.2571
295	6.76175	11	1	6.824	7.1373
296	7.21148	5	1	6.699	7.1486
297	7.63972	5	1	7.301	7.5404
298	6.75805	9	1	7.886	7.0006
299	4.00763	0	1	4.022	3.8841
300	3.96585	0	1	4.337	3.8458
301	3.99139	0	1	4.222	3.8692
302	3.95279	0	1	4.268	3.8339
303	3.86263	3	1	4.569	3.9515
304	6.59182	14	0.62	6.462	6.6816
305	6.2698	10	0.88	6.648	6.4626
306	6.57682	11	1	6.398	6.9681
307	6.05447	13	1	6.301	6.6236
309	5.90927	10	0.75	7.174	5.9616
310	5.53836	3	1	4.903	5.4846
311	4.12507	2	1	3.699	4.1249
312	6.689	5	0.75	5.939	6.3415
313	7.22552	11	0.62	6.886	7.0613
314	5.81254	11	0.75	6.87	5.9398
315	7.50421	7	1	7.377	7.5498
316	8.36899	7	1	7.886	8.341
317	4.16103	1	1	4.155	4.0911
318	7.00001	9	1	7.022	7.2219
319	4.15392	4	1	4.155	4.2847
320	6.75349	8	0.75	5.561	6.6006
321	6.85015	5	1	6.301	6.8181
323	8.29369	9	0.88	8	8.2475
325	7.57206	7	1	7.301	7.6119
326	7.0757	9	0.88	8	7.1332
327	7.08396	13	0.5	7.42	6.9072
328	8.06665	9	1	8.301	8.1978
329	5.90362	10	1	8.222	6.2856
330	7.52247	10	0.75	7.244	7.4375
331	8.31327	13	0.88	8.222	8.5322
332	7.49941	10	0.75	8.046	7.4164
333	4.3292	0	1	3.721	4.1783
334	7.80379	9	1	8.398	7.9573
335	4.2199	1	1	3.638	4.145
336	3.82528	1	1	3.125	3.7839
337	8.38773	10	0.88	8.398	8.4002
339	4.1238	2	1	4.398	4.1237
340	4.10497	2	1	4.523	4.1065
341	6.7961	10	0.88	8.222	6.9441
342	7.87945	15	0.62	8.097	7.9263
343	4.04699	1	1	3.796	3.9868
344	4.09484	1	1	3.824	4.0305
345	4.23002	1	1	3.796	4.1542
346	4.12861	2	1	4.398	4.1281
347	4.27853	0	1	3.62	4.1319
348	6.94796	7	0.62	6.337	6.5406
349	6.90385	11	0.62	6.638	6.767
350	4.09835	0	1	3.699	3.9671
351	6.80743	25	0.62	8.523	7.6125
352	4.31534	1	1	4.222	4.2323
353	6.79671	5	1	7.301	6.7692
354	4.01171	0	1	4.699	3.8878
355	4.2976	7	1	3.886	4.6162
356	4.20588	7	1	4.301	4.5323
357	4.3857	1	1	2.222	4.2967
358	6.05825	9	1	5.824	6.3603
359	7.39243	8	1	7.523	7.5142
360	7.4672	15	0.62	7.155	7.5492
361	7.07276	5	1	6.301	7.0217
362	4.08978	0	1	3.921	3.9592
363	4.35405	0	1	4.469	4.201
364	6.84776	9	0.75	6.553	6.7535
365	7.13571	5	0.88	7.648	6.9213
366	5.49516	10	1	6.222	5.9119
367	7.22617	9	1	6.076	7.4288
368	8.21785	5	0.88	8.398	7.9113
369	7.2552	9	0.88	7.523	7.2974
370	7.6321	8	1	7.638	7.7335
371	6.7431	5	1	6.523	6.7201
372	5.71643	5	1	5.222	5.7809
373	7.02125	7	1	7.699	7.108
374	7.38265	5	0.88	8.301	7.1472
375	8.08329	5	1	8.367	7.9462
376	7.53239	5	1	7.523	7.4422
377	7.4606	21	0.62	7.77	7.9433
378	6.60158	3	1	7.081	6.4573
379	6.90675	0	1	5.377	6.5364
380	7.44087	6	0.75	6.569	7.096
381	8.22213	9	0.75	8.328	8.0109
382	7.77658	9	0.75	8.337	7.6032
383	8.29321	6	0.88	8.328	8.047
384	6.86077	5	1	7.585	6.8278
385	6.28419	9	1	7.071	6.567
386	8.07093	7	1	8.444	8.0683
387	7.37793	23	0.62	8.187	8.001
389	6.68667	3	1	6.854	6.5351
390	7.43061	7	1	8.347	7.4825
391	7.10143	13	0.62	8.328	7.0812
393	7.3953	11	1	7.62	7.7169
394	7.27173	7	1	8.387	7.3371
395	7.7103	10	1	7.232	7.9384
396	7.43994	7	1	7.474	7.491
397	7.33331	7	0.88	7.662	7.2355
398	7.47941	8	1	7.018	7.5938
399	6.92309	12	0.75	7.593	7.0225
400	6.99632	8	0.75	7.349	6.8227
401	7.47774	7	1	8.602	7.5256
402	7.78809	10	1	8.74	8.0096
403	6.19254	5	1	6.854	6.2164
404	5.85895	5	1	5.533	5.9112
405	7.38195	10	0.62	6.764	7.1377
406	5.63627	8	1	6.62	5.9076
407	8.147	7	0.88	8.523	7.9799
408	7.39151	8	1	7.658	7.5134
409	8.2805	10	1	8.398	8.4601
410	8.42044	8	1	8.222	8.4547
411	8.22159	8	1	8.523	8.2728
412	7.48509	10	1	8.222	7.7324
413	6.69744	14	0.5	6.378	6.6203
414	7.29955	7	1	7.237	7.3626
415	7.64789	9	0.75	6.754	7.4855
416	7.8013	7	1	7.45	7.8216
417	7.65315	7	0.88	7.234	7.5281
418	5.77922	9	1	6.032	6.1051
419	7.00267	11	0.88	5.783	7.1998
420	7.64887	7	0.62	8.398	7.1819
421	7.49116	7	0.75	8.523	7.2087
424	7.1667	9	0.88	6.921	7.2164
425	7.59214	9	0.75	6.357	7.4345
426	7.24787	11	0.75	7.77	7.2529
427	7.6497	12	0.37	6.745	7.1869
428	7.05445	11	0.75	5.638	7.076
429	7.26774	11	0.75	5.77	7.2711
430	5.68594	5	1	5.398	5.753
431	6.52827	8	1	5.666	6.7237
432	6.45911	12	0.62	7.252	6.4268
434	5.79407	11	1	6	6.252
435	5.43554	15	0.75	5.328	5.8616
437	5.89255	15	0.75	4.886	6.2797
438	4.0305	10	1	5.18	4.5719
The true external set (N=66)
No.	RA function(ED)	CATS2D_07_AL	LLS_02
7	7.03985	3	1
11	5.96751	5	1
12	6.61102	3	1
14	5.96622	2	1
19	7.57833	2	1
20	6.09217	3	1
22	5.9546	0	1
23	7.48075	4	1
25	5.92929	1	1
26	6.70289	2	1
27	7.05016	5	1
28	5.21668	0	1
29	4.47594	5	1
30	4.47617	4	1
31	4.47213	6	1
32	4.12447	5	1
35	4.47555	5	1
36	4.15738	2	1
38	6.91257	8	1
68	7.70888	4	1
123	5.84634	7	1
133	6.06849	5	1
135	5.68349	7	1
136	6.0813	5	1
137	6.14964	6	1
143	5.30389	7	1
149	7.42598	1	1
150	5.87132	0	1
152	6.66505	3	1
153	6.15933	7	1
162	5.50512	7	1
171	7.5021	5	1
172	7.23733	3	1
180	7.08153	1	1
185	5.89113	4	1
186	6.86777	3	1
187	6.77346	3	1
188	7.21545	5	1
189	7.40351	4	1
190	7.15971	5	1
191	6.93219	5	1
192	7.57507	5	1
212	6.00373	3	1
213	6.20901	3	1
215	7.20754	5	1
224	6.43632	4	1
226	7.09282	3	1
240	7.09258	2	1
250	6.4166	2	1
255	5.65091	6	1
268	7.48536	3	1
269	6.64758	5	1
277	5.22514	5	1
285	4.18501	0	1
290	6.96168	5	1
293	4.33656	1	1
308	3.94664	3	0.875
322	4.13636	1	1
324	4.24668	1	1
338	3.66403	0	1
388	7.16569	9	0.62
392	5.74922	10	0.625
422	4.91932	0	1
423	4.53022	0	1
433	7.58729	9	1
436	5.98783	17	0.875

## Sheet: Table S9
Table S9. Detailed results of the prediction quality of 2D-QSAR-Full model for each true external compound from "Prediction Reliability Indicator".
No.	Score(MAE-LOO)	Score(Proximity Train YObs Mean)	Score(Similarity based AD)	CompositeScore	Prediction Quality	YPred(Test) pIC50	Closest Training Compound	Euclidean Distance	Generalized Jaccard Coeff.
7	2	3	3	3	Good	6.5647	50	0.0317194	0.97177
11	2	3	3	3	Good	6.2825	151	0.0850257	0.917415
12	2	3	3	3	Good	6.9494	17	0.0546731	0.970808
14	2	3	3	3	Good	6.2427	151	0.0807318	0.917222
19	2	3	3	3	Good	6.5627	5	0.126597	0.921935
20	2	3	3	3	Good	6.4183	109	0.0757709	0.934928
22	1	3	3	3	Good	6.3829	310	0.194363	0.854885
23	2	3	3	3	Good	7.161	173	0.0320072	0.982196
25	2	3	3	3	Good	6.0381	17	0.215621	0.875148
26	2	3	3	3	Good	7.2135	46	0.120819	0.909809
27	2	3	3	3	Good	6.3852	48	0.181996	0.88587
28	2	3	3	3	Good	5.7949	310	0.0706784	0.942372
29	1	3	1	2	Moderate	4.3225	302	0.194026	0.768609
30	1	3	1	2	Moderate	4.0966	302	0.232534	0.655677
31	2	3	1	2	Moderate	4.5819	355	0.204063	0.729696
32	1	3	1	2	Moderate	4.8254	356	0.182418	0.778972
35	2	3	1	2	Moderate	4.5166	355	0.194378	0.785333
36	2	3	1	2	Moderate	5.1005	355	0.596741	0.273453
38	2	3	3	3	Good	6.8231	175	0.0103213	0.991381
68	2	3	3	3	Good	7.2125	138	0.0196087	0.990236
123	2	3	3	3	Good	5.9851	404	0.0918515	0.893179
133	2	3	3	3	Good	6.1385	114	0.0606766	0.942908
135	3	3	3	3	Good	5.629	70	0.0987464	0.868538
136	2	3	3	3	Good	6.2863	114	0.0903877	0.909608
137	2	3	3	3	Good	6.5851	358	0.0943691	0.918976
143	2	3	3	3	Good	6.5163	66	0.253179	0.703609
149	2	3	3	3	Good	6.8865	117	0.0787774	0.951269
150	2	3	3	3	Good	5.8011	151	0.14753	0.875387
152	3	3	3	3	Good	6.9966	229	0.136496	0.877066
153	2	3	3	3	Good	6.7183	358	0.0958664	0.916244
162	2	3	3	3	Good	6.3443	366	0.0400269	0.959556
171	2	3	3	3	Good	7.397	18	0.0237596	0.982962
172	2	3	3	3	Good	5.6044	86	0.125688	0.90764
180	2	3	3	3	Good	6.2085	291	0.0885227	0.937705
185	1	3	3	3	Good	5.6886	208	0.102971	0.920146
186	2	3	3	3	Good	6.3687	182	0.105394	0.928321
187	2	3	3	3	Good	6.2383	321	0.103687	0.927902
188	2	3	3	3	Good	6.5383	208	0.0697415	0.935255
189	2	3	3	3	Good	7.1401	243	0.0453454	0.966108
190	2	3	3	3	Good	7.268	275	0.0321156	0.978626
191	2	3	3	3	Good	7.1187	104	0.0799539	0.940382
192	2	2	3	3	Good	9.2613	219	0.101803	0.94339
212	2	3	2	3	Good	5.9263	151	0.238485	0.820352
213	1	3	3	3	Good	6.0128	227	0.0655358	0.95901
215	2	2	2	2	Moderate	9.2005	219	0.0961373	0.928681
224	3	3	3	3	Good	6.8468	17	0	1
226	2	3	3	3	Good	6.7093	233	0.0597561	0.956652
240	2	3	3	3	Good	6.5947	233	0.067313	0.948819
250	2	3	3	3	Good	6.5822	234	0.0582032	0.956189
255	2	3	3	3	Good	5.6732	257	0.121689	0.922938
268	2	3	3	3	Good	7.2255	9	0.0158623	0.988294
269	2	3	3	3	Good	6.6928	272	0.0229823	0.97969
277	2	3	3	3	Good	6.2445	310	0.0406187	0.969282
285	3	3	3	3	Good	4.6871	317	0.222736	0.754984
290	2	3	3	3	Good	5.632	181	0.146615	0.850339
293	2	1	2	2	Moderate	1.802	279	0.331458	0.757521
308	2	2	1	2	Moderate	3.3484	303	0.0191173	0.963496
322	3	3	3	3	Good	4.6766	340	0.148128	0.818239
324	2	2	3	3	Good	3.5168	279	0.136905	0.854274
338	2	2	1	2	Moderate	3.2994	336	0.0558567	0.950314
388	2	3	3	3	Good	7.2415	72	0.119317	0.930161
392	2	3	3	3	Good	4.8775	418	0.046753	0.969849
422	2	3	3	3	Good	4.7944	66	0.214363	0.709847
423	2	3	2	3	Good	5.2115	66	0.166208	0.77631
433	2	3	3	3	Good	6.3208	88	0.105858	0.923884
436	2	3	3	3	Good	4.8981	81	0.214612	0.816736
User-defined Weightage :
To Score MAE(Loo)	0
To Score (AD)	0.5
To Score (Mean)	0.5
Internal validation metrics:
R^2	0.6426
Q^2(LOO)	0.6202
Avg Rm^2	0.4666
Delta Rm^2	0.2667
MAE (100% data)	0.6101
MAE (95% data)	0.546

## Sheet: Table S10
Table S10. Detailed results of the prediction quality of q-RASAR-Full QSAR model for each true external compound from "Prediction Reliability Indicator".
No.	Score(MAE-LOO)	Score(Proximity Train YObs Mean)	Score(Similarity based AD)	CompositeScore	PredictionQuality	YPred(Test)	AD status	Closest Training Compound	Euclidean Distance	Generalized Jaccard Coeff.
7	2	3	3	3	Good	6.85823	In	118	0.00626285	0.99631
11	2	3	3	3	Good	6.01056	In	404	0.0212994	0.985821
12	2	3	3	3	Good	6.46591	In	378	0.0018908	0.998809
14	2	3	3	3	Good	5.80931	In	16	0.0125103	0.990756
19	2	3	3	3	Good	7.28417	In	21	0.0239162	0.986015
20	2	3	3	3	Good	5.99122	In	154	0.00101551	0.999299
22	2	3	3	3	Good	5.6653	In	16	0.0707858	0.940545
23	2	3	3	3	Good	7.32828	In	173	0.00546339	0.997064
25	2	3	3	3	Good	5.70883	In	16	0.0354418	0.969924
26	2	3	3	3	Good	6.48326	In	142	0.00751218	0.995155
27	2	3	3	3	Good	7.00104	In	361	0.00470135	0.997421
28	2	3	3	3	Good	4.9902	In	66	0.0675209	0.934886
29	2	3	3	3	Good	4.64597	In	108	0.0470111	0.959117
30	2	3	3	3	Good	4.57949	In	319	0.0540854	0.946125
31	2	3	3	3	Good	4.70918	In	355	0.043992	0.945113
32	3	3	3	3	Good	4.32443	In	319	0.0312436	0.963501
35	2	3	3	3	Good	4.64561	In	108	0.0470804	0.959057
36	3	2	3	3	Good	4.15445	In	346	0.00473653	0.994567
38	2	3	3	3	Good	7.07524	In	217	0.0393119	0.976673
68	3	3	3	3	Good	7.53699	In	99	0.00322021	0.998311
123	2	3	3	3	Good	6.03309	In	211	0.0151108	0.990346
133	2	3	3	3	Good	6.10295	In	403	0.0248631	0.98426
135	1	3	3	2	Moderate	5.8841	In	211	0.017142	0.988941
136	2	3	3	3	Good	6.11467	In	403	0.0222954	0.985886
137	2	3	3	3	Good	6.24387	In	147	0.0102889	0.993701
143	2	3	3	3	Good	5.53681	In	222	0.0601538	0.955921
149	3	3	3	3	Good	7.07811	In	21	0.036556	0.975068
150	2	3	3	3	Good	5.58911	In	16	0.070254	0.943615
152	2	3	3	3	Good	6.51534	In	389	0.00434344	0.9973
153	2	3	3	3	Good	6.31943	In	34	0.0231815	0.986024
162	1	3	3	2	Moderate	5.72092	In	158	0.0396856	0.96426
171	2	3	3	3	Good	7.41451	In	198	0.000417	0.999783
172	3	3	3	3	Good	7.0389	In	97	0.00254936	0.998534
180	2	3	3	3	Good	6.76298	In	92	0.0381788	0.970407
185	2	3	3	3	Good	5.87399	In	148	0.0297318	0.979137
186	2	3	3	3	Good	6.70079	In	76	0.00415382	0.997489
187	2	3	3	3	Good	6.61452	In	76	0.0148998	0.990972
188	2	3	3	3	Good	7.15226	In	296	0.000827	0.999555
189	2	3	3	3	Good	7.25762	In	173	0.0105321	0.994324
190	2	3	3	3	Good	7.10127	In	175	0.00729221	0.996044
191	2	3	3	3	Good	6.89311	In	85	0.000618	0.999654
192	3	3	3	3	Good	7.48126	In	126	0.00747471	0.996164
212	2	3	3	3	Good	5.91031	In	113	0.00568753	0.995991
213	2	3	3	3	Good	6.09811	In	227	0.00667893	0.995512
215	2	3	3	3	Good	7.14502	In	177	0.000336	0.999819
224	3	3	3	3	Good	6.37277	In	17	1.86e-11	1
226	2	3	3	3	Good	6.90669	In	118	0.0170176	0.990038
240	2	3	3	3	Good	6.83978	In	92	0.0139294	0.991436
250	2	3	3	3	Good	6.22134	In	51	0.0355518	0.972062
255	2	3	3	3	Good	5.7876	In	158	0.0108934	0.992539
268	2	3	3	3	Good	7.26581	In	174	0.00853931	0.995218
269	3	3	3	3	Good	6.63274	In	129	0.0105169	0.993835
277	2	3	3	3	Good	5.33139	In	199	0.00541904	0.995833
285	3	2	3	3	Good	4.04636	In	350	0.0139495	0.98251
290	2	3	3	3	Good	6.9201	In	85	0.00549541	0.996935
293	2	3	3	3	Good	4.25169	In	352	0.00352058	0.995989
308	2	2	3	2	Moderate	3.86377	In	303	0.148152	0.81098
322	3	2	3	3	Good	4.06854	In	317	0.00403414	0.995178
324	2	2	3	2	Moderate	4.16947	In	345	0.00274346	0.996795
338	2	2	1	2	Moderate	3.56972	Outside AD	336	0.038744	0.927796
388	2	3	3	3	Good	6.8732	In	251	0.012579	0.991539
392	3	3	3	3	Good	5.65059	In	254	0.163786	0.863084
422	2	3	3	3	Good	4.71815	In	66	0.0919889	0.888448
423	2	3	3	3	Good	4.36217	In	363	0.0290241	0.966761
433	2	3	3	3	Good	7.75921	In	370	0.040654	0.977266
436	2	3	3	3	Good	6.66487	In	307	0.241008	0.827763
